# Supplementary material for: 4-Azidocinnoline—Cinnoline-4-amine Pair as a New Fluorogenic and Fluorochromic Environment-Sensitive Probe
Source: MDPI journal article supplement (doi:10.3390/molecules26247460), 2021-12-09
Supplement: s1 [file s1]

## Supporting Information

### 4-Azidocinnoline – Cinnoline-4-amine Pair as a New Fluorogenic and Fluorochromic Environment-Sensitive Probe

Natalia A. Danilkina <sup>1</sup>, Ekaterina V. Andrievskaya <sup>2</sup>, Anna V. Vasileva <sup>1</sup>, Anna L. Lyapunova <sup>1</sup>, Andrey M. Rumyantsev <sup>3</sup>, Andrey A. Kuzmin <sup>4</sup>, Elena A. Bessonova <sup>1</sup> and Irina A. Balova <sup>1,\*</sup>

<sup>1</sup> Institute of Chemistry, Saint Petersburg State University (SPbU), Universitetskaya nab. 7/9, 199034 Saint Petersburg, Russia; i.balova@spbu.ru

<sup>2</sup> Faculty of Chemistry, Belarusian State University, Leningradskaya str. 14, 220006 Minsk, Belarus; kateandrievskaya@yandex.by

<sup>3</sup> Department of Genetics and Biotechnology, Saint Petersburg State University (SPbU), Universitetskaya nab. 7/9, 199034 Saint Petersburg, Russia

<sup>4</sup> Institute of Cytology, Russian Academy of Sciences, St Petersburg, Tikhoretsky avenue 4, 194064, Saint Petersburg, Russia; a.kuzmin@incras.ru

\* Correspondence: i.balova@spbu.ru; Tel.: +78124286733

## Table of Contents

|                                                                    |     |
|--------------------------------------------------------------------|-----|
| Copies of NMR Spectra and ESI HRMS.....                            | S2  |
| Details of HPLC Measurements and Copies of HPLC Chromatograms...   | S29 |
| Details of QY Fluorescence Measurements.....                       | S31 |
| Experimental details for the synthesis of amines <b>7a,b</b> ..... | S32 |
| References.....                                                    | S34 |

$^1\text{H}$  NMR, acetone- $d_6$ , 400 MHz

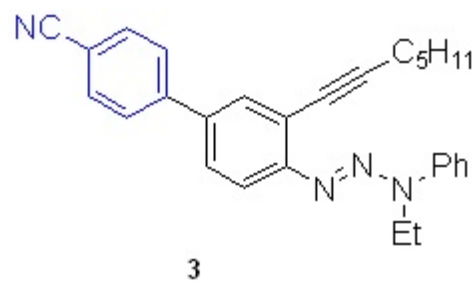

7.94  
7.92  
7.88  
7.87  
7.85  
7.81  
7.73  
7.73  
7.71  
7.71  
7.70  
7.67  
7.63  
7.63  
7.61  
7.47  
7.45  
7.43  
7.20  
7.18  
7.16

4.50  
4.48  
4.46  
4.44

2.52  
2.50  
2.49

2.05 Acetone- $d_6$

1.64  
1.63  
1.39  
1.38  
1.36  
0.91  
0.89

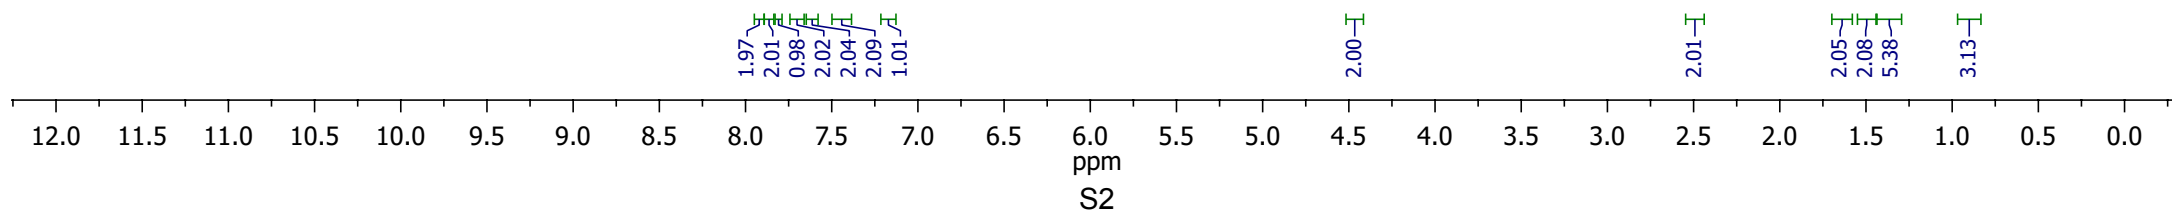

$^1\text{H}$  NMR, acetone- $d_6$ , 400 MHz

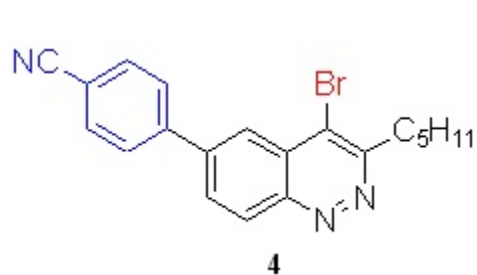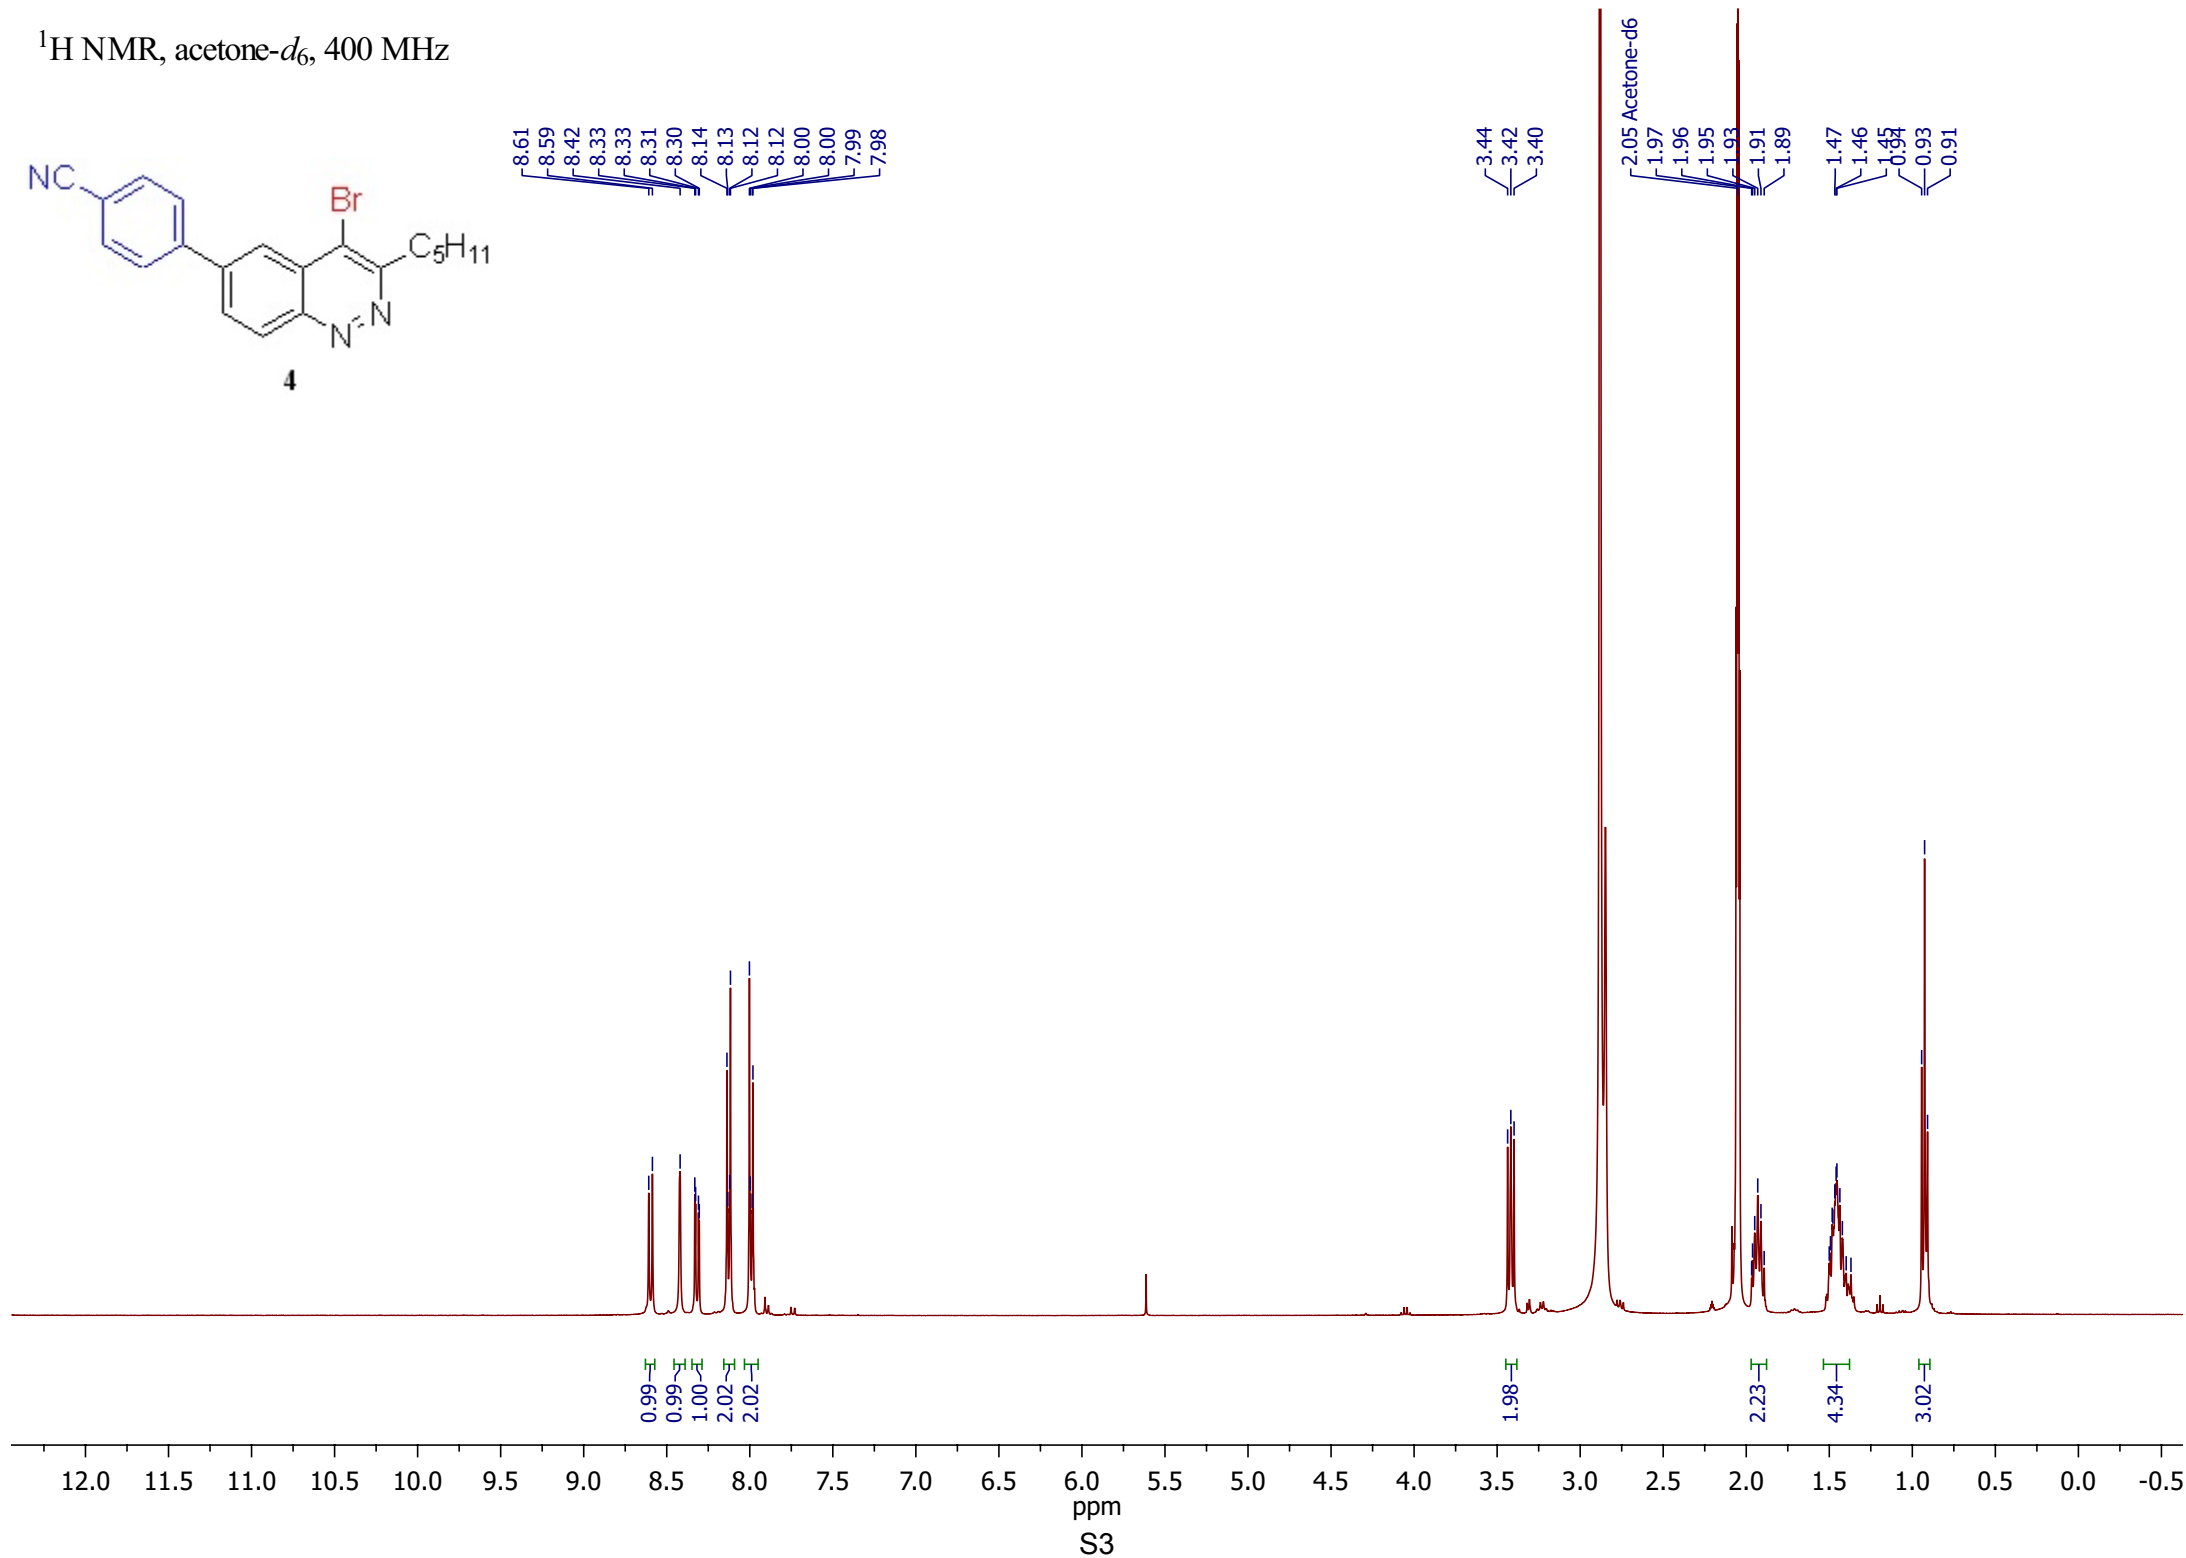

$^1\text{H}$  NMR, acetone- $d_6$ , 400 MHz

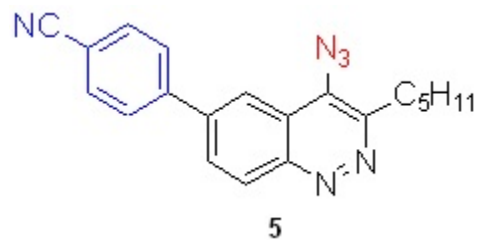

8.54  
8.54  
8.52  
8.51  
8.51  
8.51  
8.28  
8.28  
8.26  
8.25  
8.11  
8.11  
8.10  
8.09  
8.09  
7.99  
7.99  
7.97  
7.97

3.39  
3.37  
3.35

2.05 Acetone- $d_6$   
1.98  
1.96  
1.94  
1.92  
1.90  
1.48  
1.46  
1.45  
0.93  
0.91

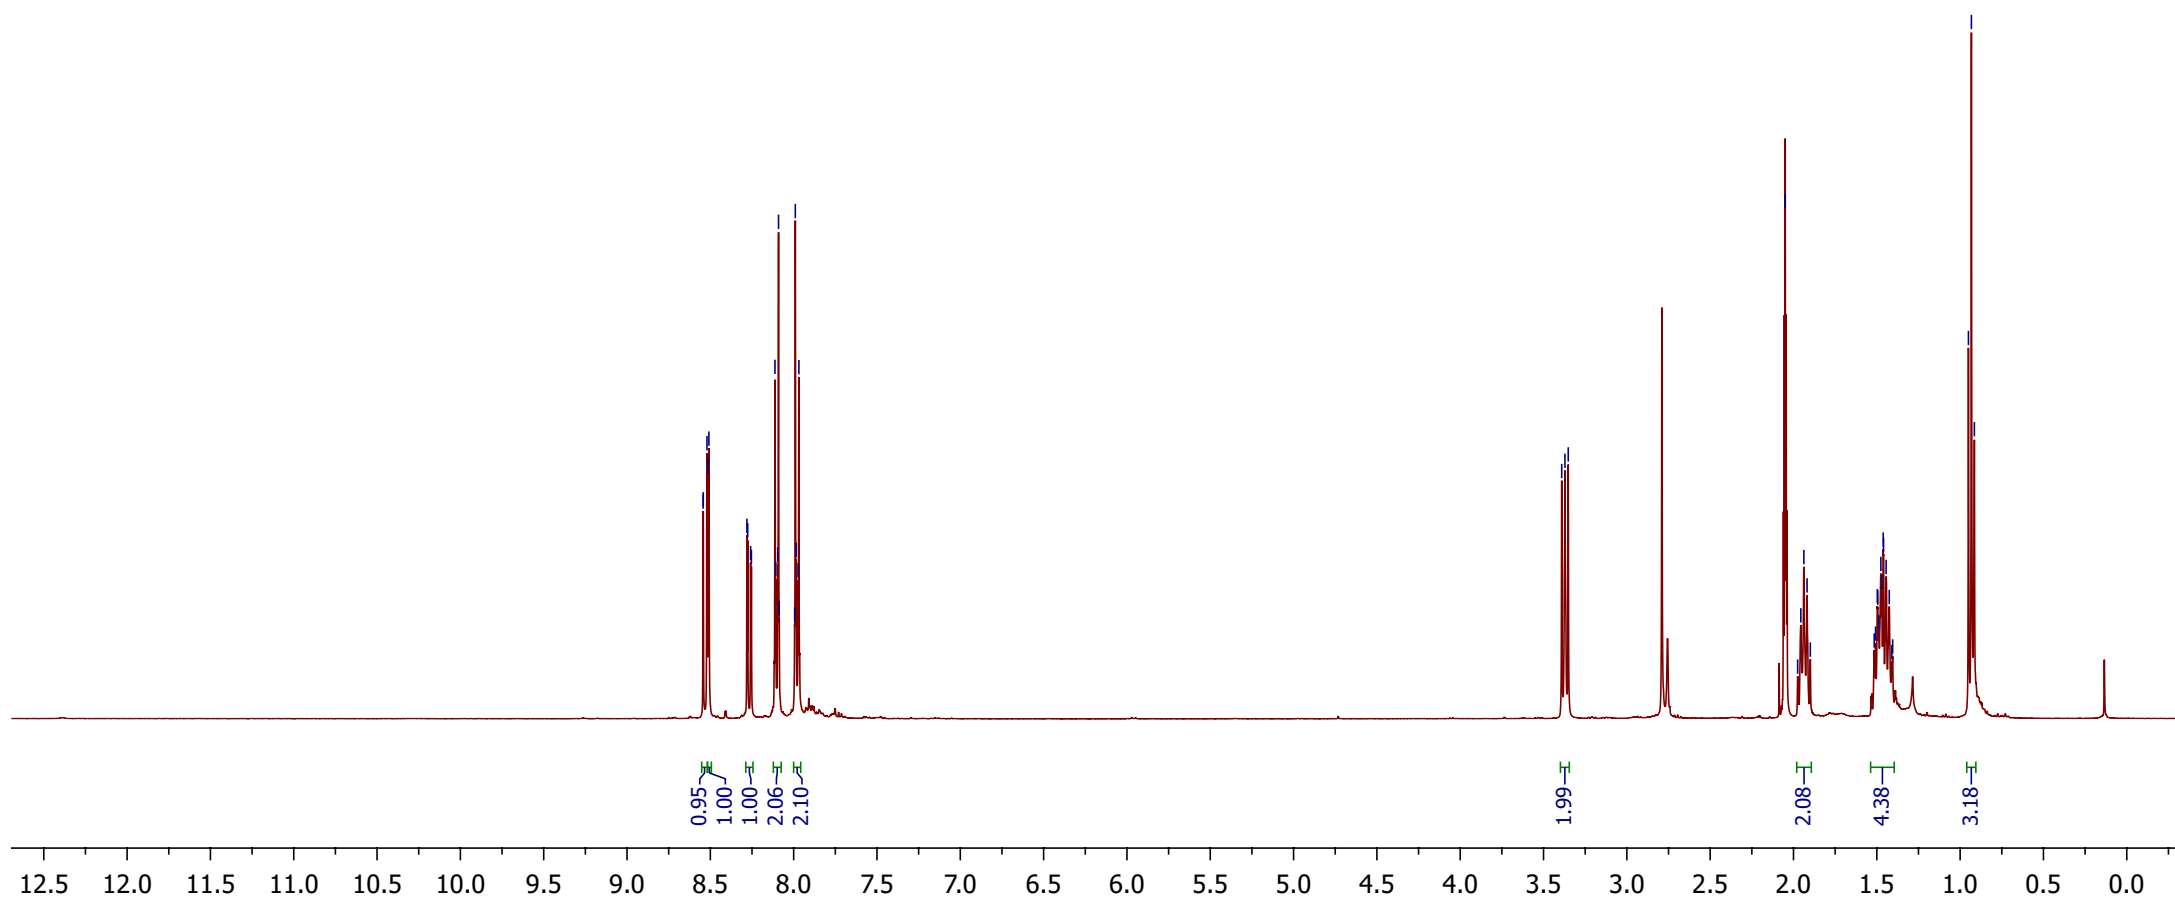

<sup>1</sup>H NMR, DMSO-*d*<sub>6</sub>, 400 MHz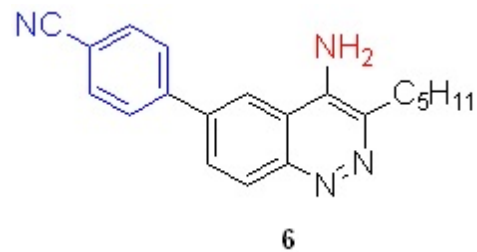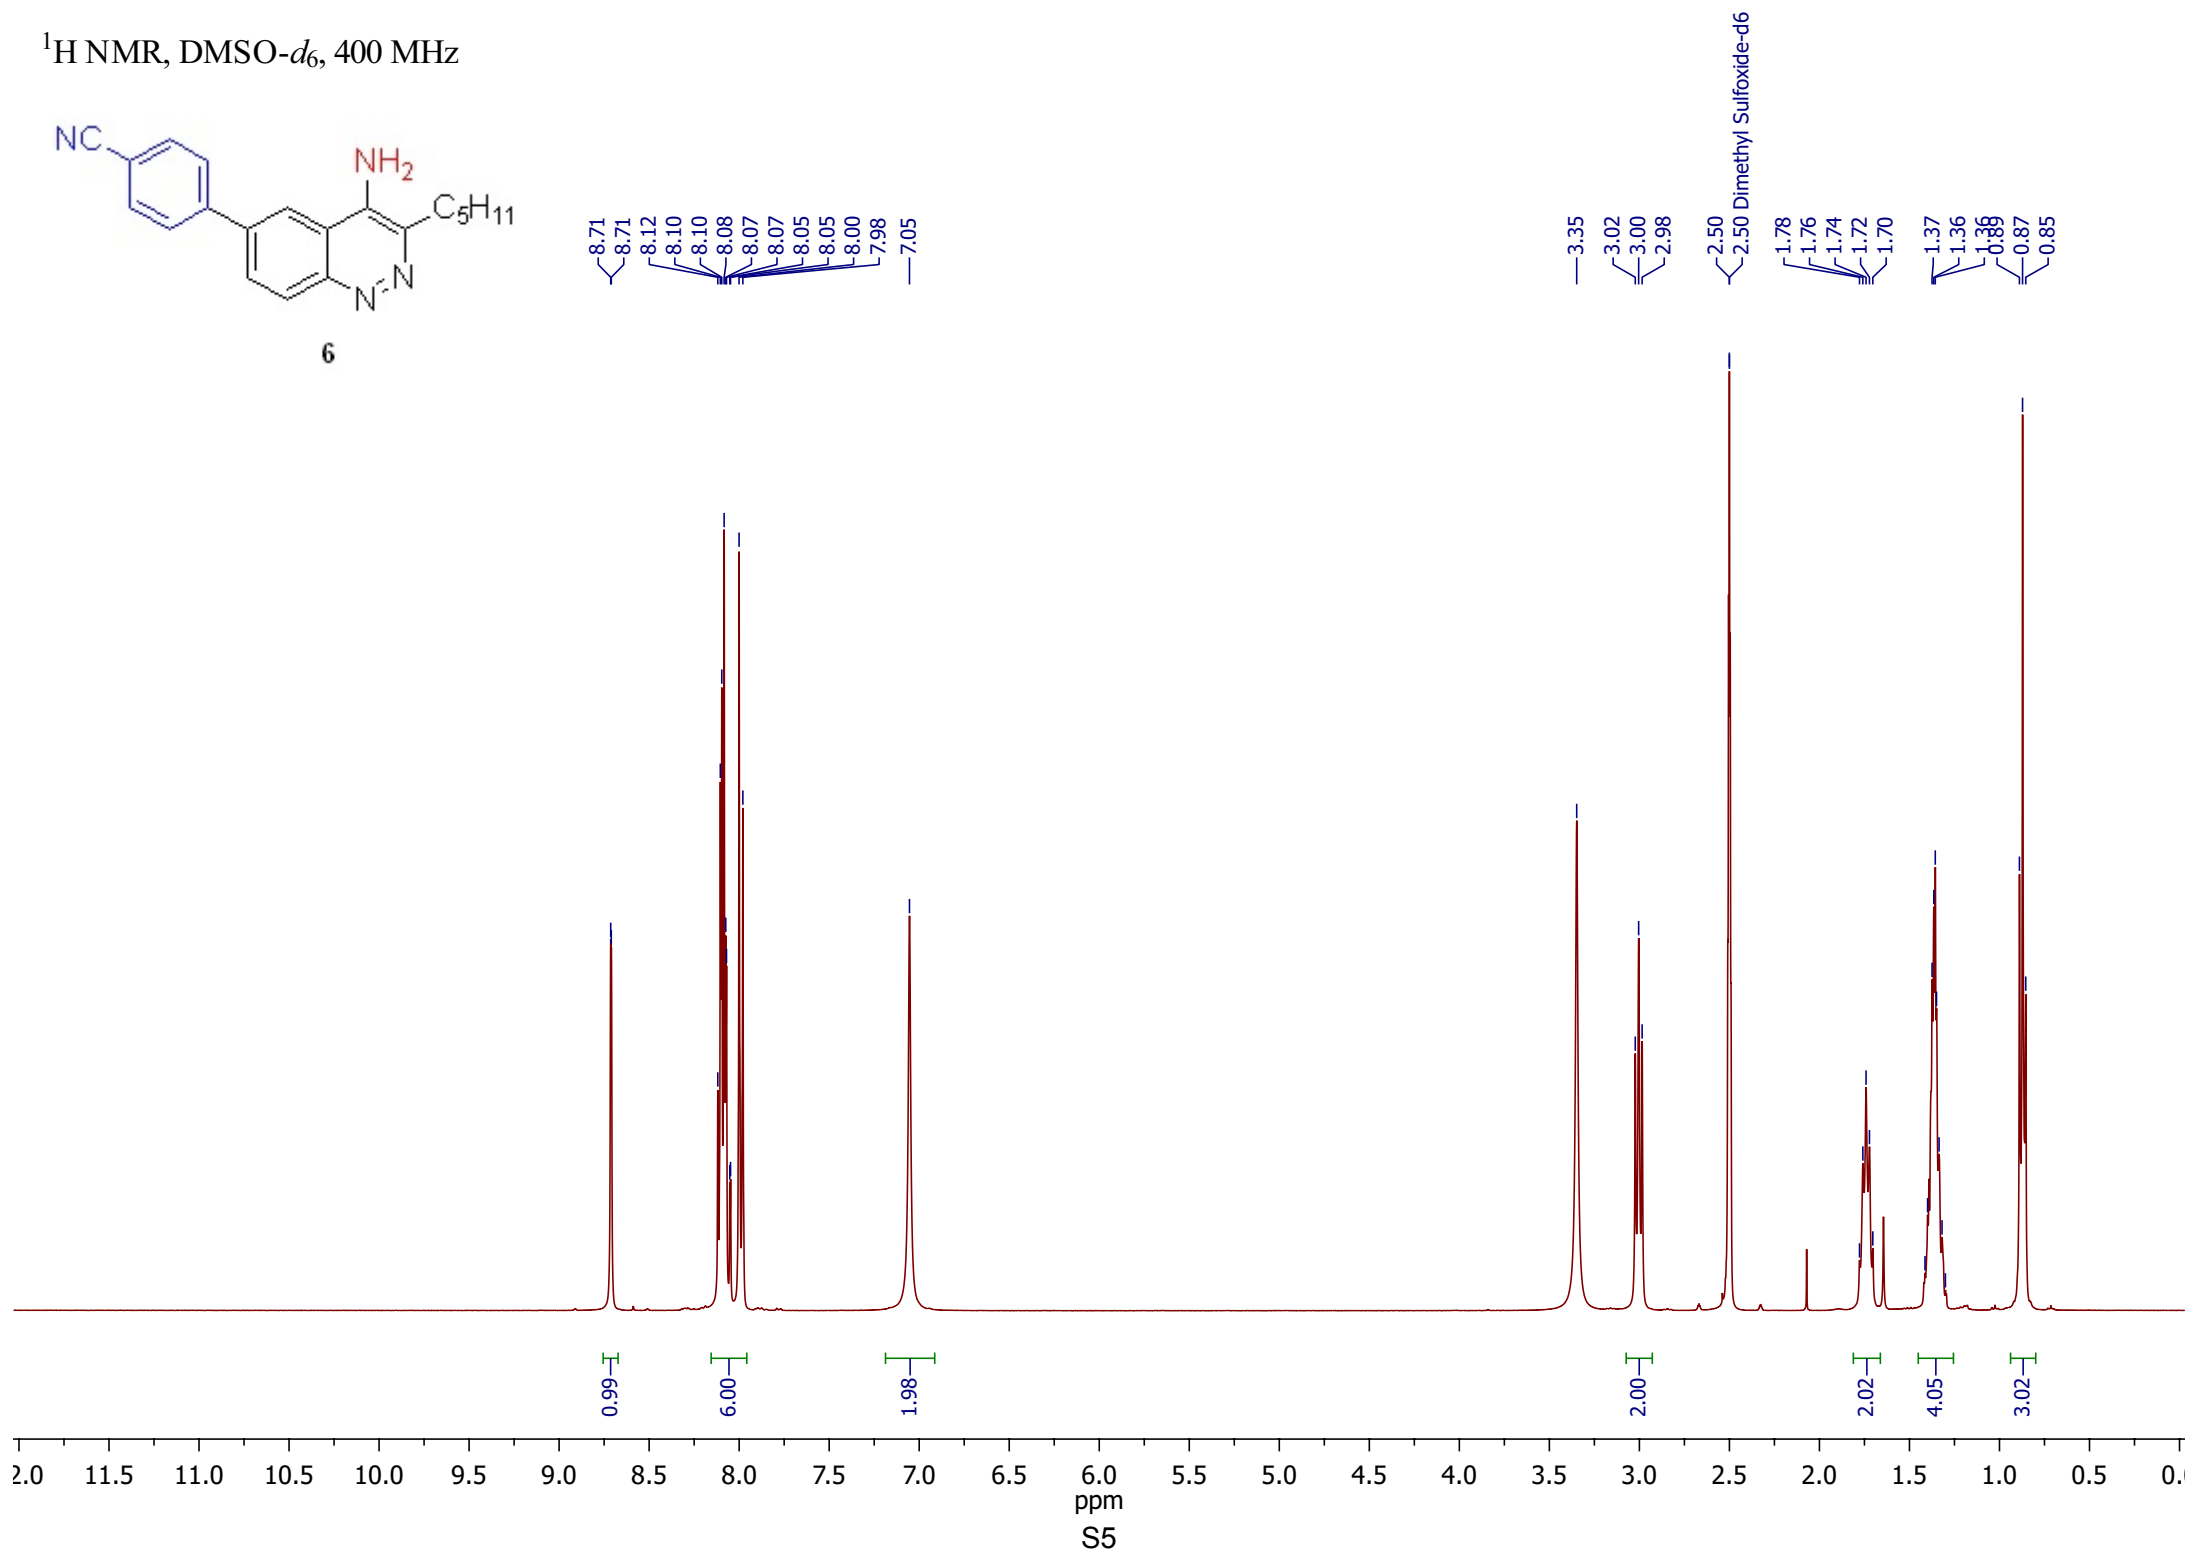

$^{13}\text{C}$  NMR, DMSO- $d_6$ , 101 MHz

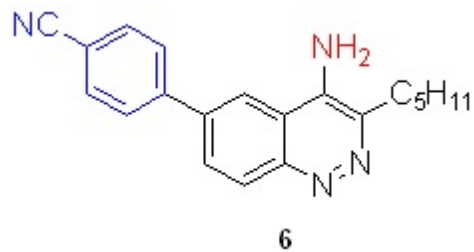

147.6  
143.5  
142.3  
139.2  
135.9  
132.8  
129.0  
127.8

120.5  
118.8  
114.5  
110.4

39.5 Dimethyl Sulfoxide- $d_6$

31.2  
31.0  
27.1  
22.1  
14.0

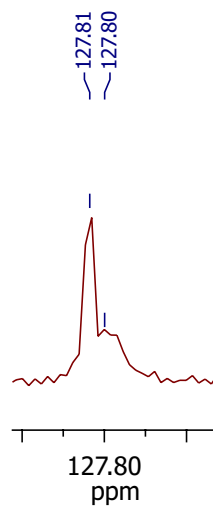

00 190 180 170 160 150 140 130 120 110 100 90 80 70 60 50 40 30 20 10 0 -1

ppm

S6

DEPT NMR, DMSO-*d*<sub>6</sub>, 101 MHz

132.9  
129.0  
127.9  
127.8

120.6

76.8

31.2  
31.0  
27.2

22.1

14.0

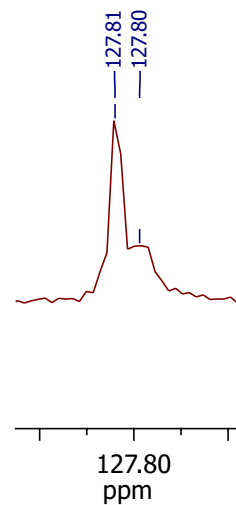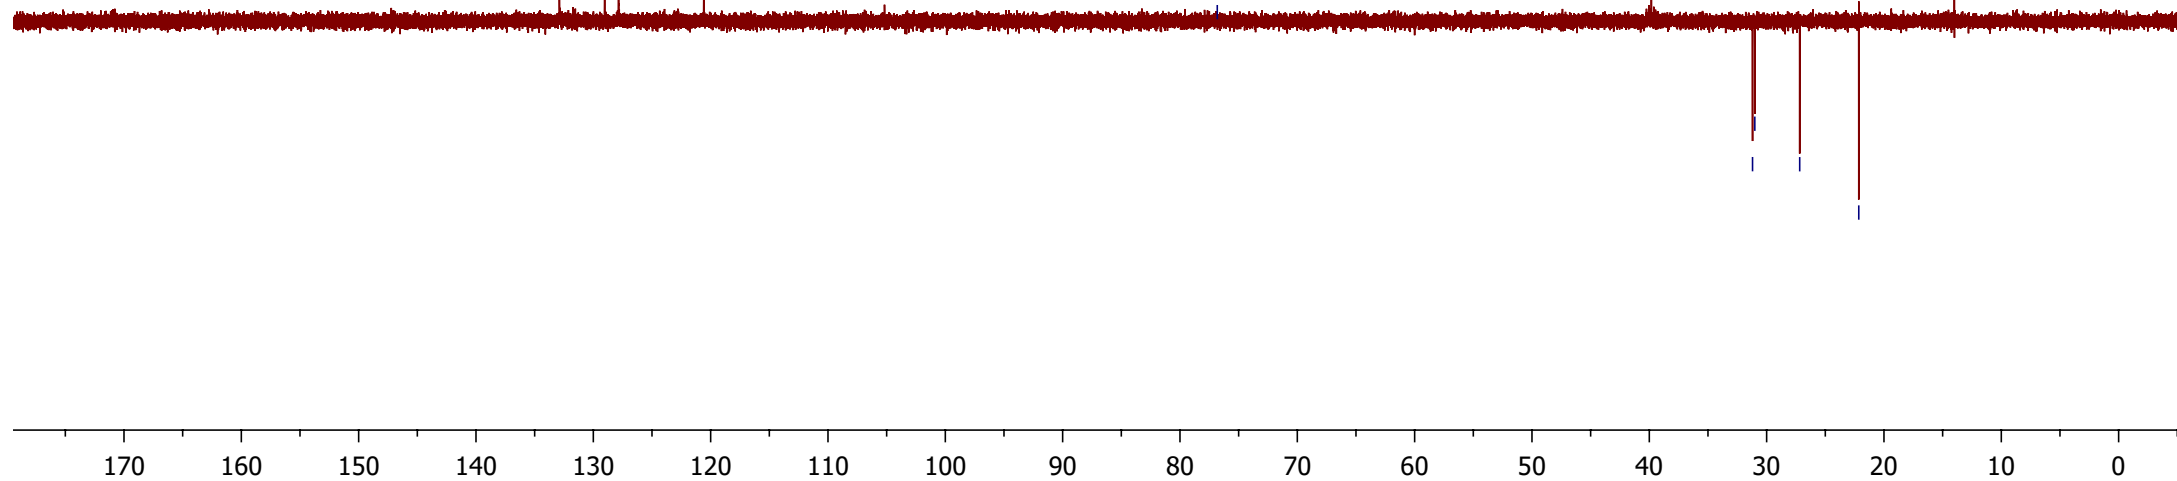

ppm

S7

## Mass Spectrum Report

### Analysis Info

Analysis Name D:\Data\2020\february\20\E6.d  
Method tune\_low.m  
Sample Name E6  
Comment MeOH

Acquisition Date 20.02.2020 16:33:49  
Operator  
Instrument / Ser# Bruker Customer  
microTOF 10223

### Acquisition Parameter

|             |            |                      |          |                  |           |
|-------------|------------|----------------------|----------|------------------|-----------|
| Source Type | ESI        | Ion Polarity         | Positive | Set Nebulizer    | 0.4 Bar   |
| Focus       | Not active |                      |          | Set Dry Heater   | 180 °C    |
| Scan Begin  | 50 m/z     | Set Capillary        | 4500 V   | Set Dry Gas      | 4.0 l/min |
| Scan End    | 3000 m/z   | Set End Plate Offset | -500 V   | Set Divert Valve | Source    |

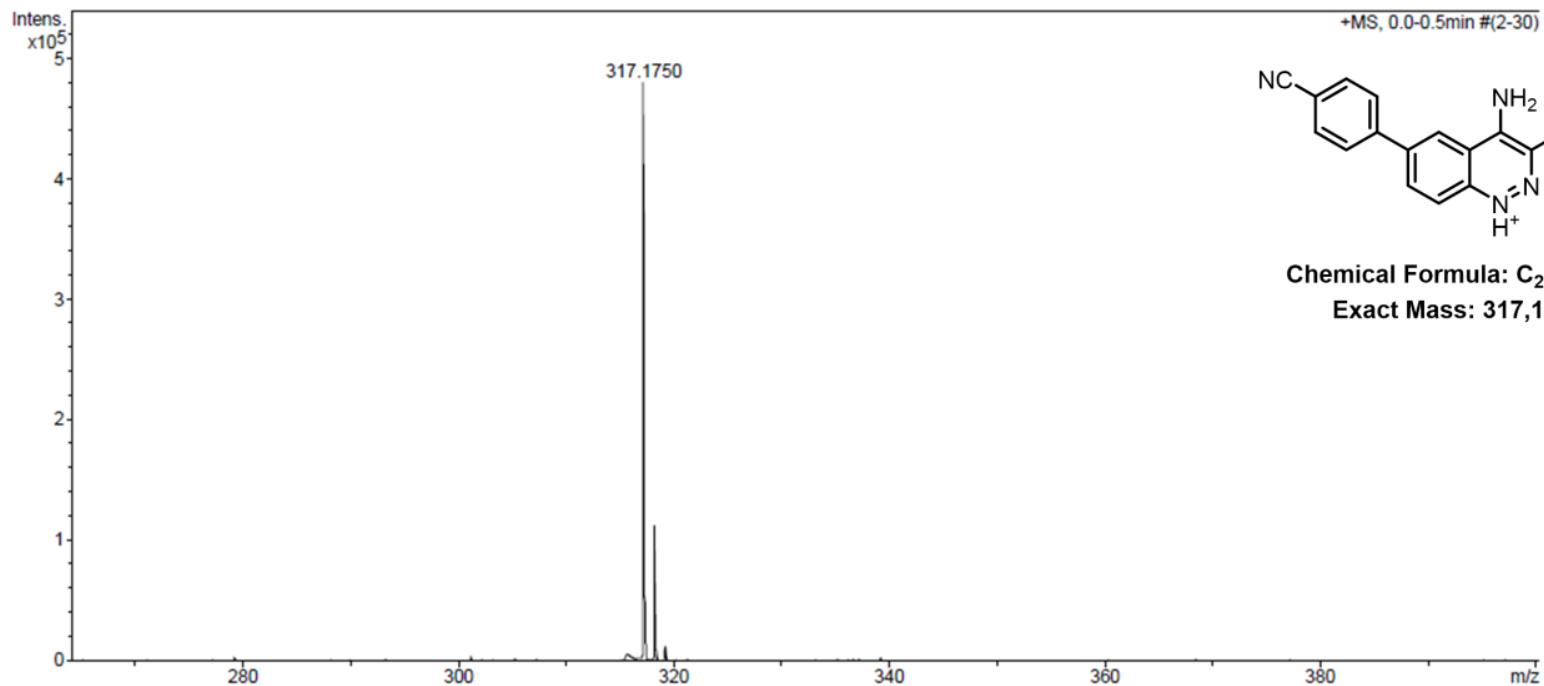



$^1\text{H}$  NMR, acetone- $d_6$ , 400 MHz

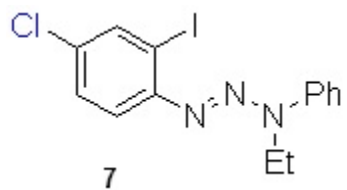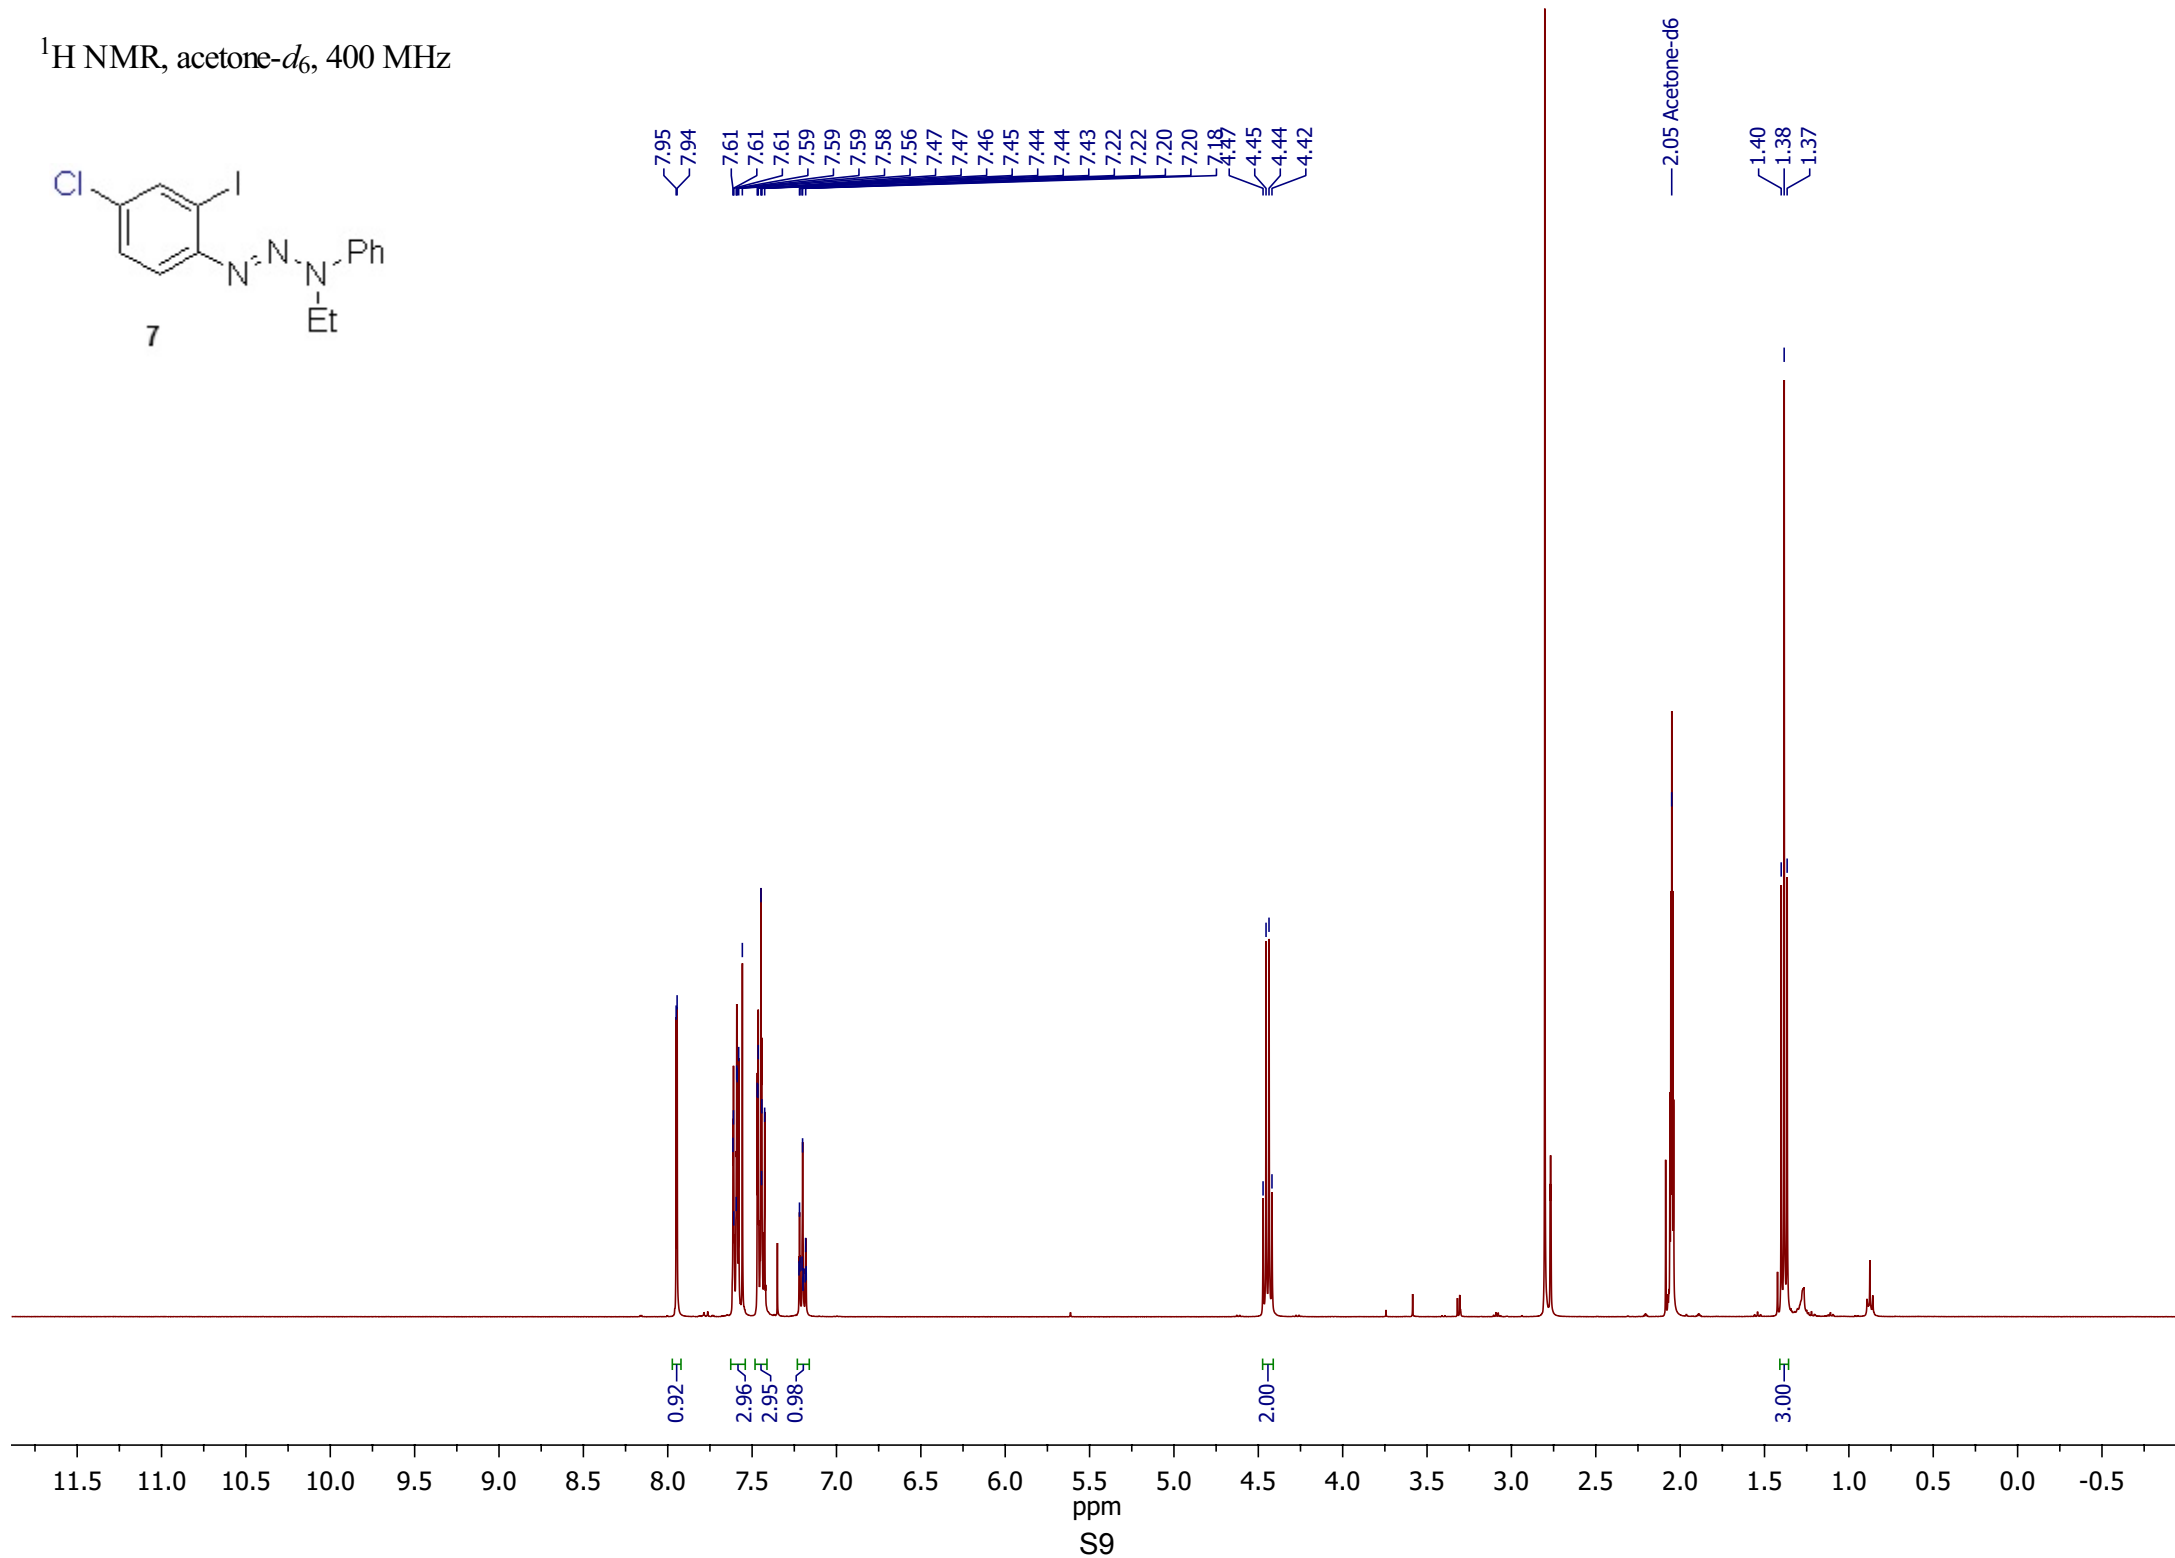

$^{13}\text{C}$  NMR, acetone- $d_6$ , 101 MHz

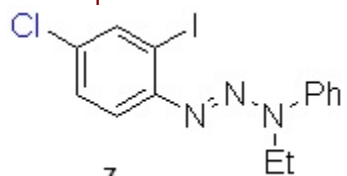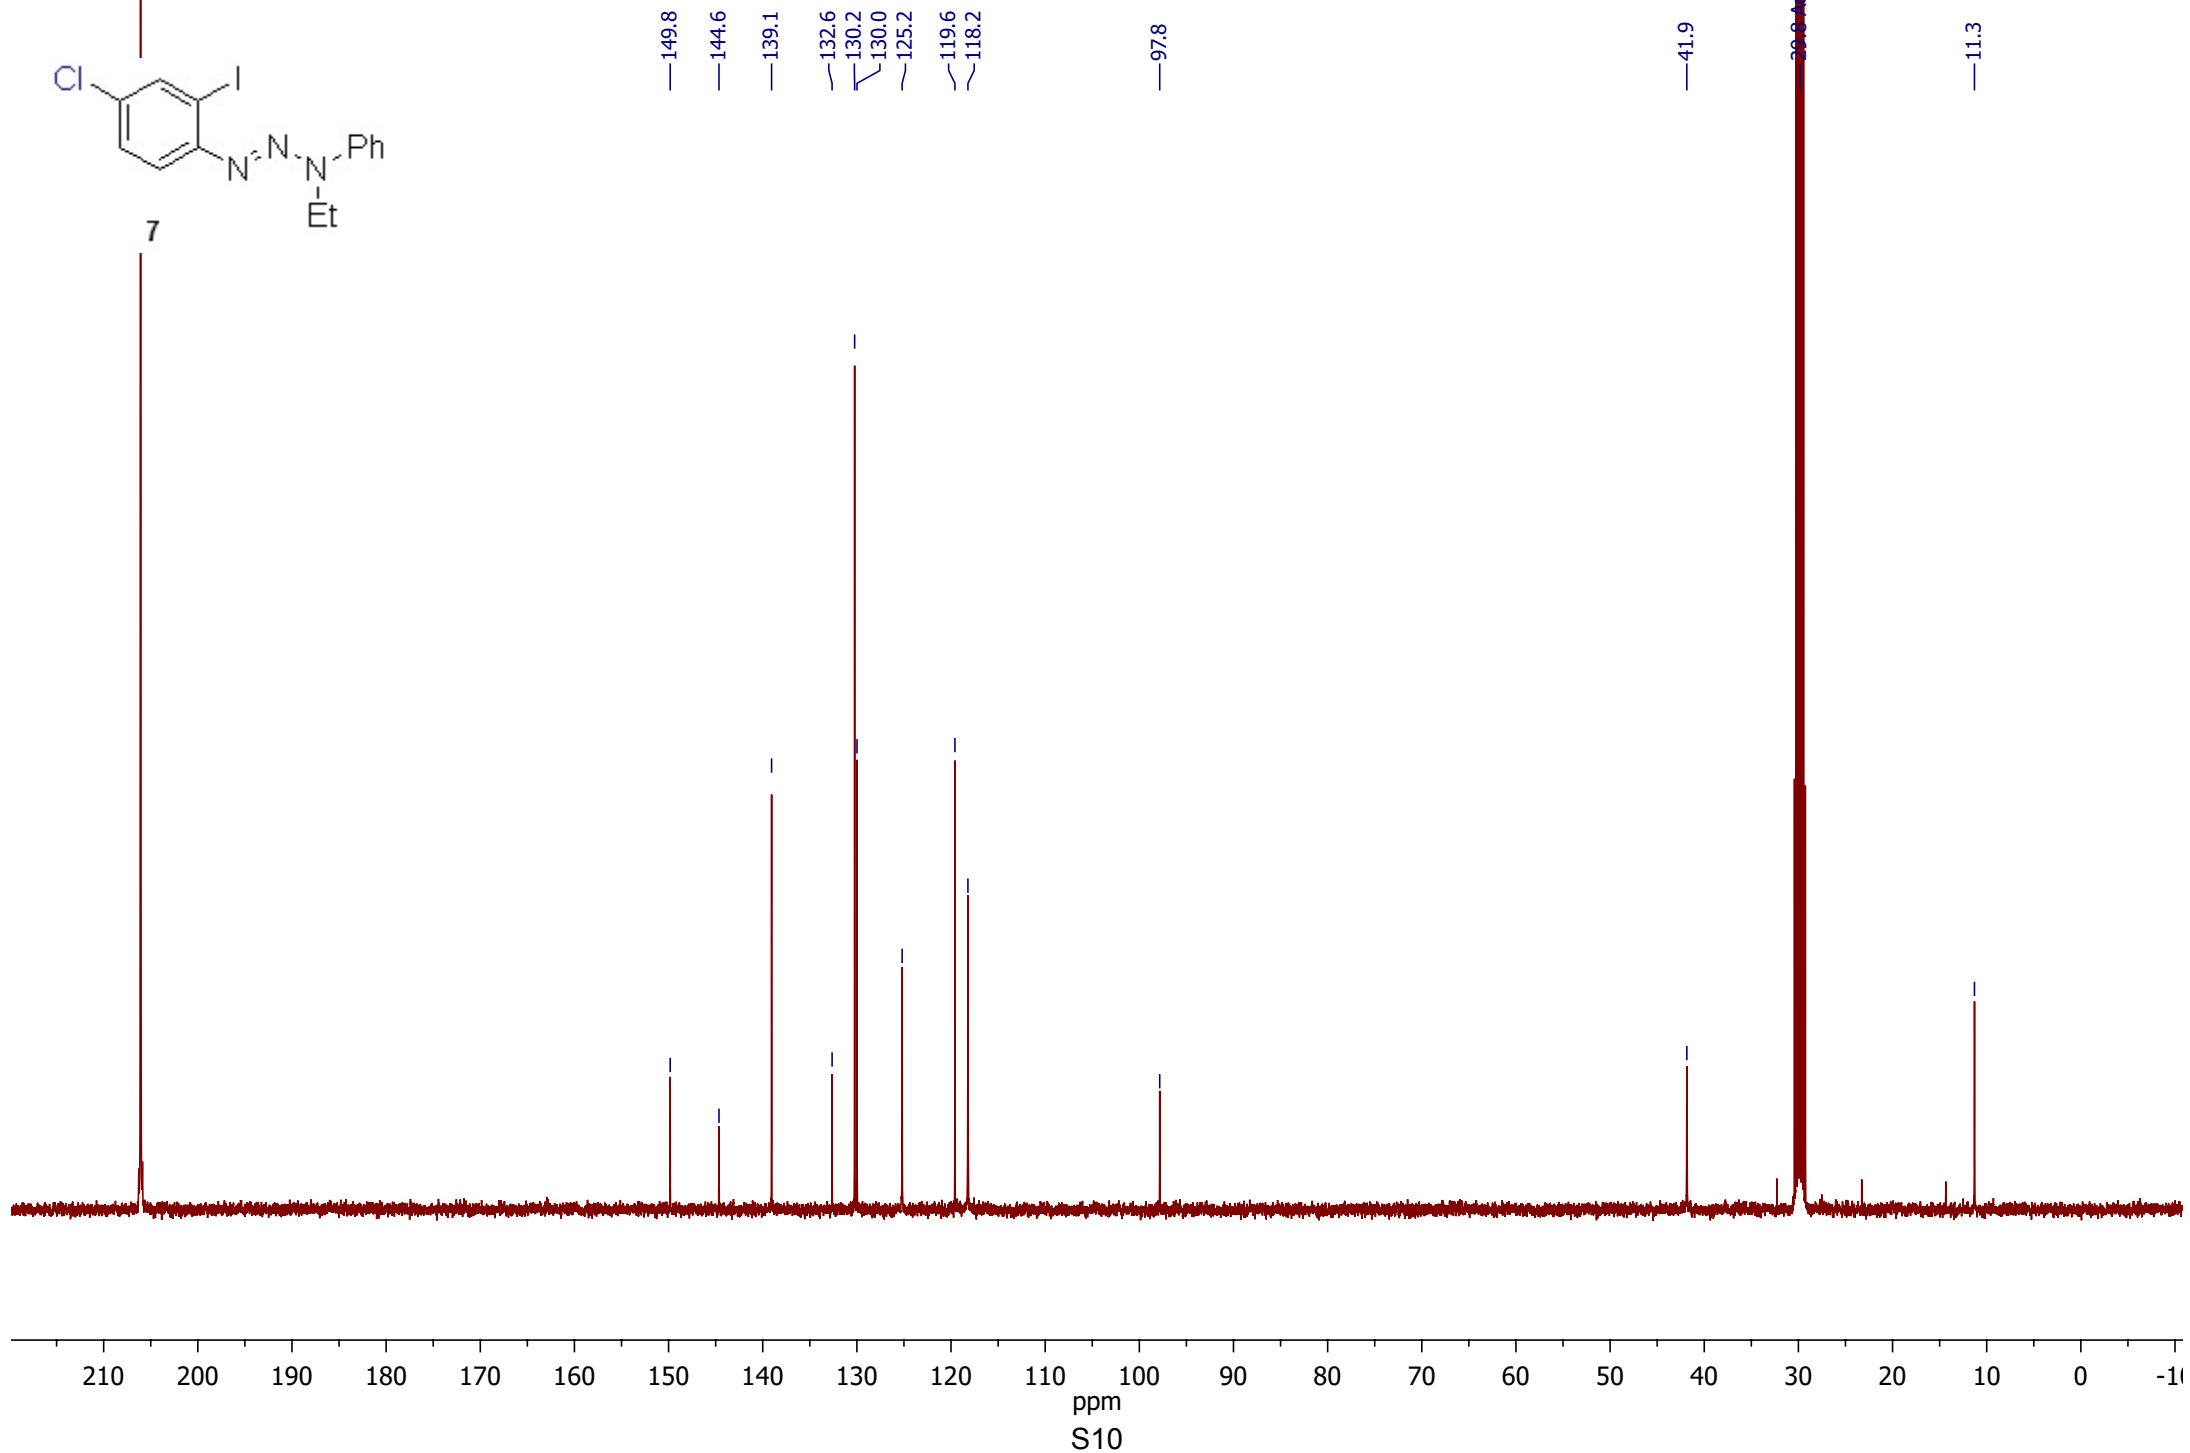

DEPT NMR, acetone-*d*<sub>6</sub>, 101 MHz

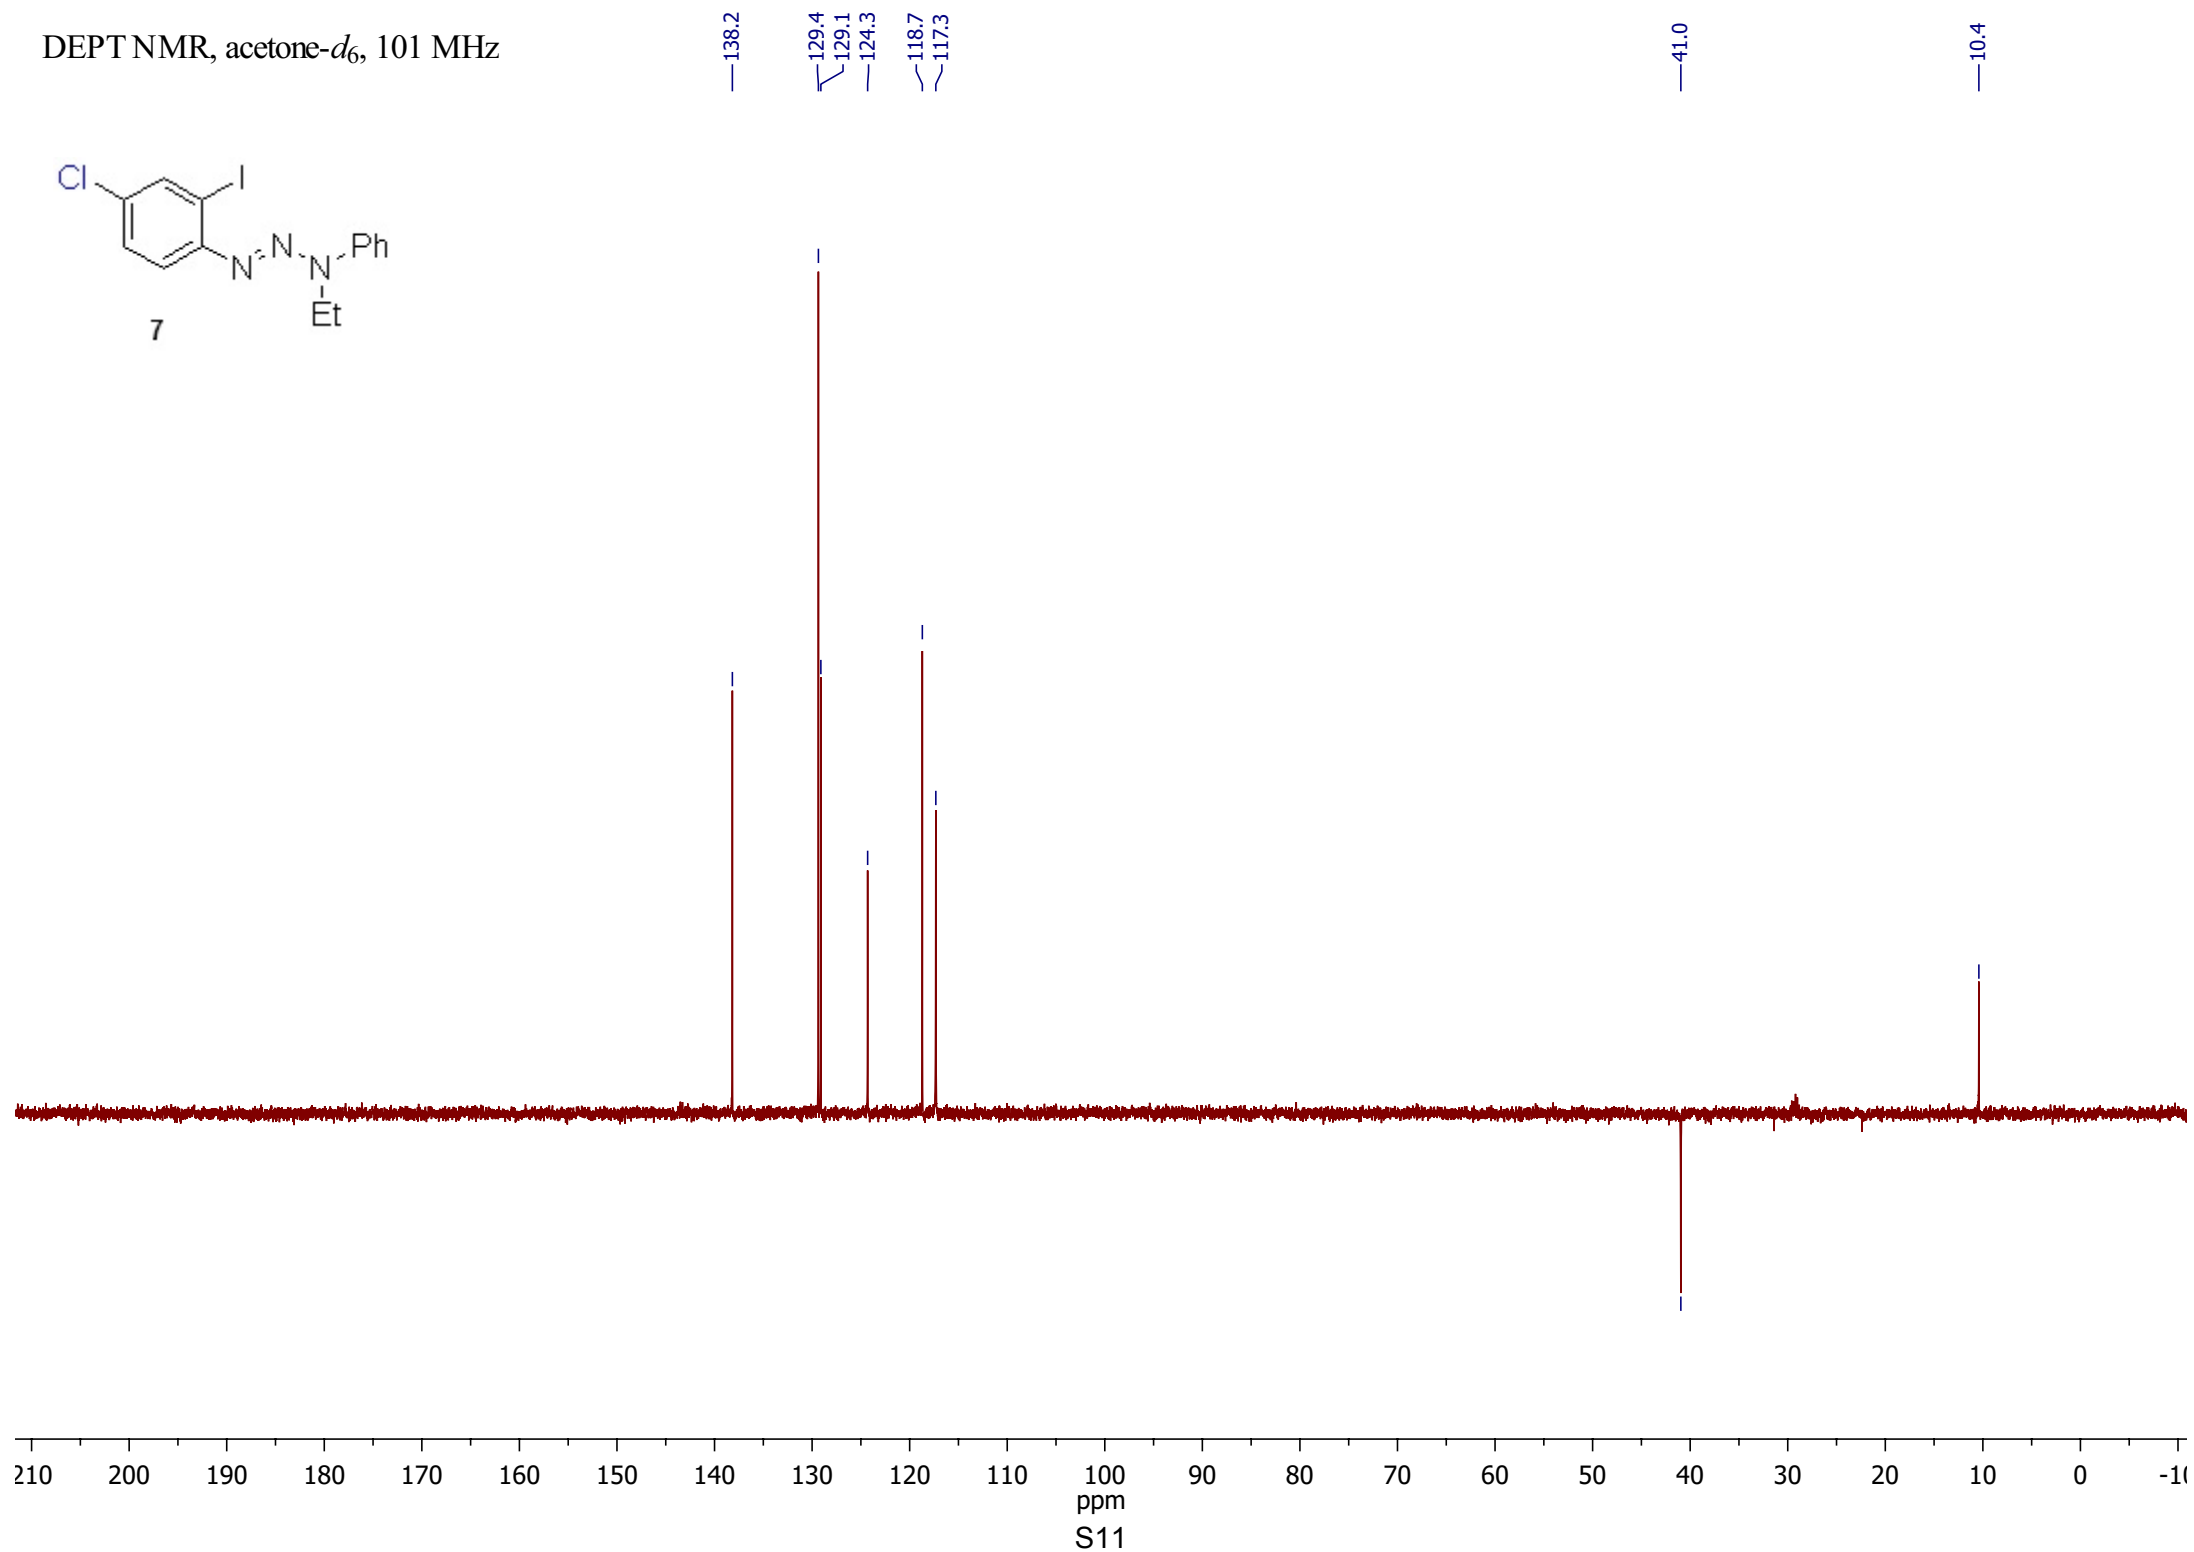

$^1\text{H}$  NMR, acetone- $d_6$ , 400 MHz

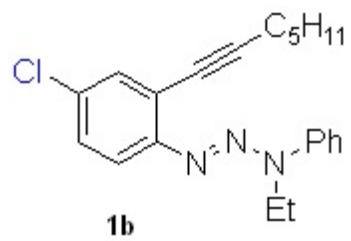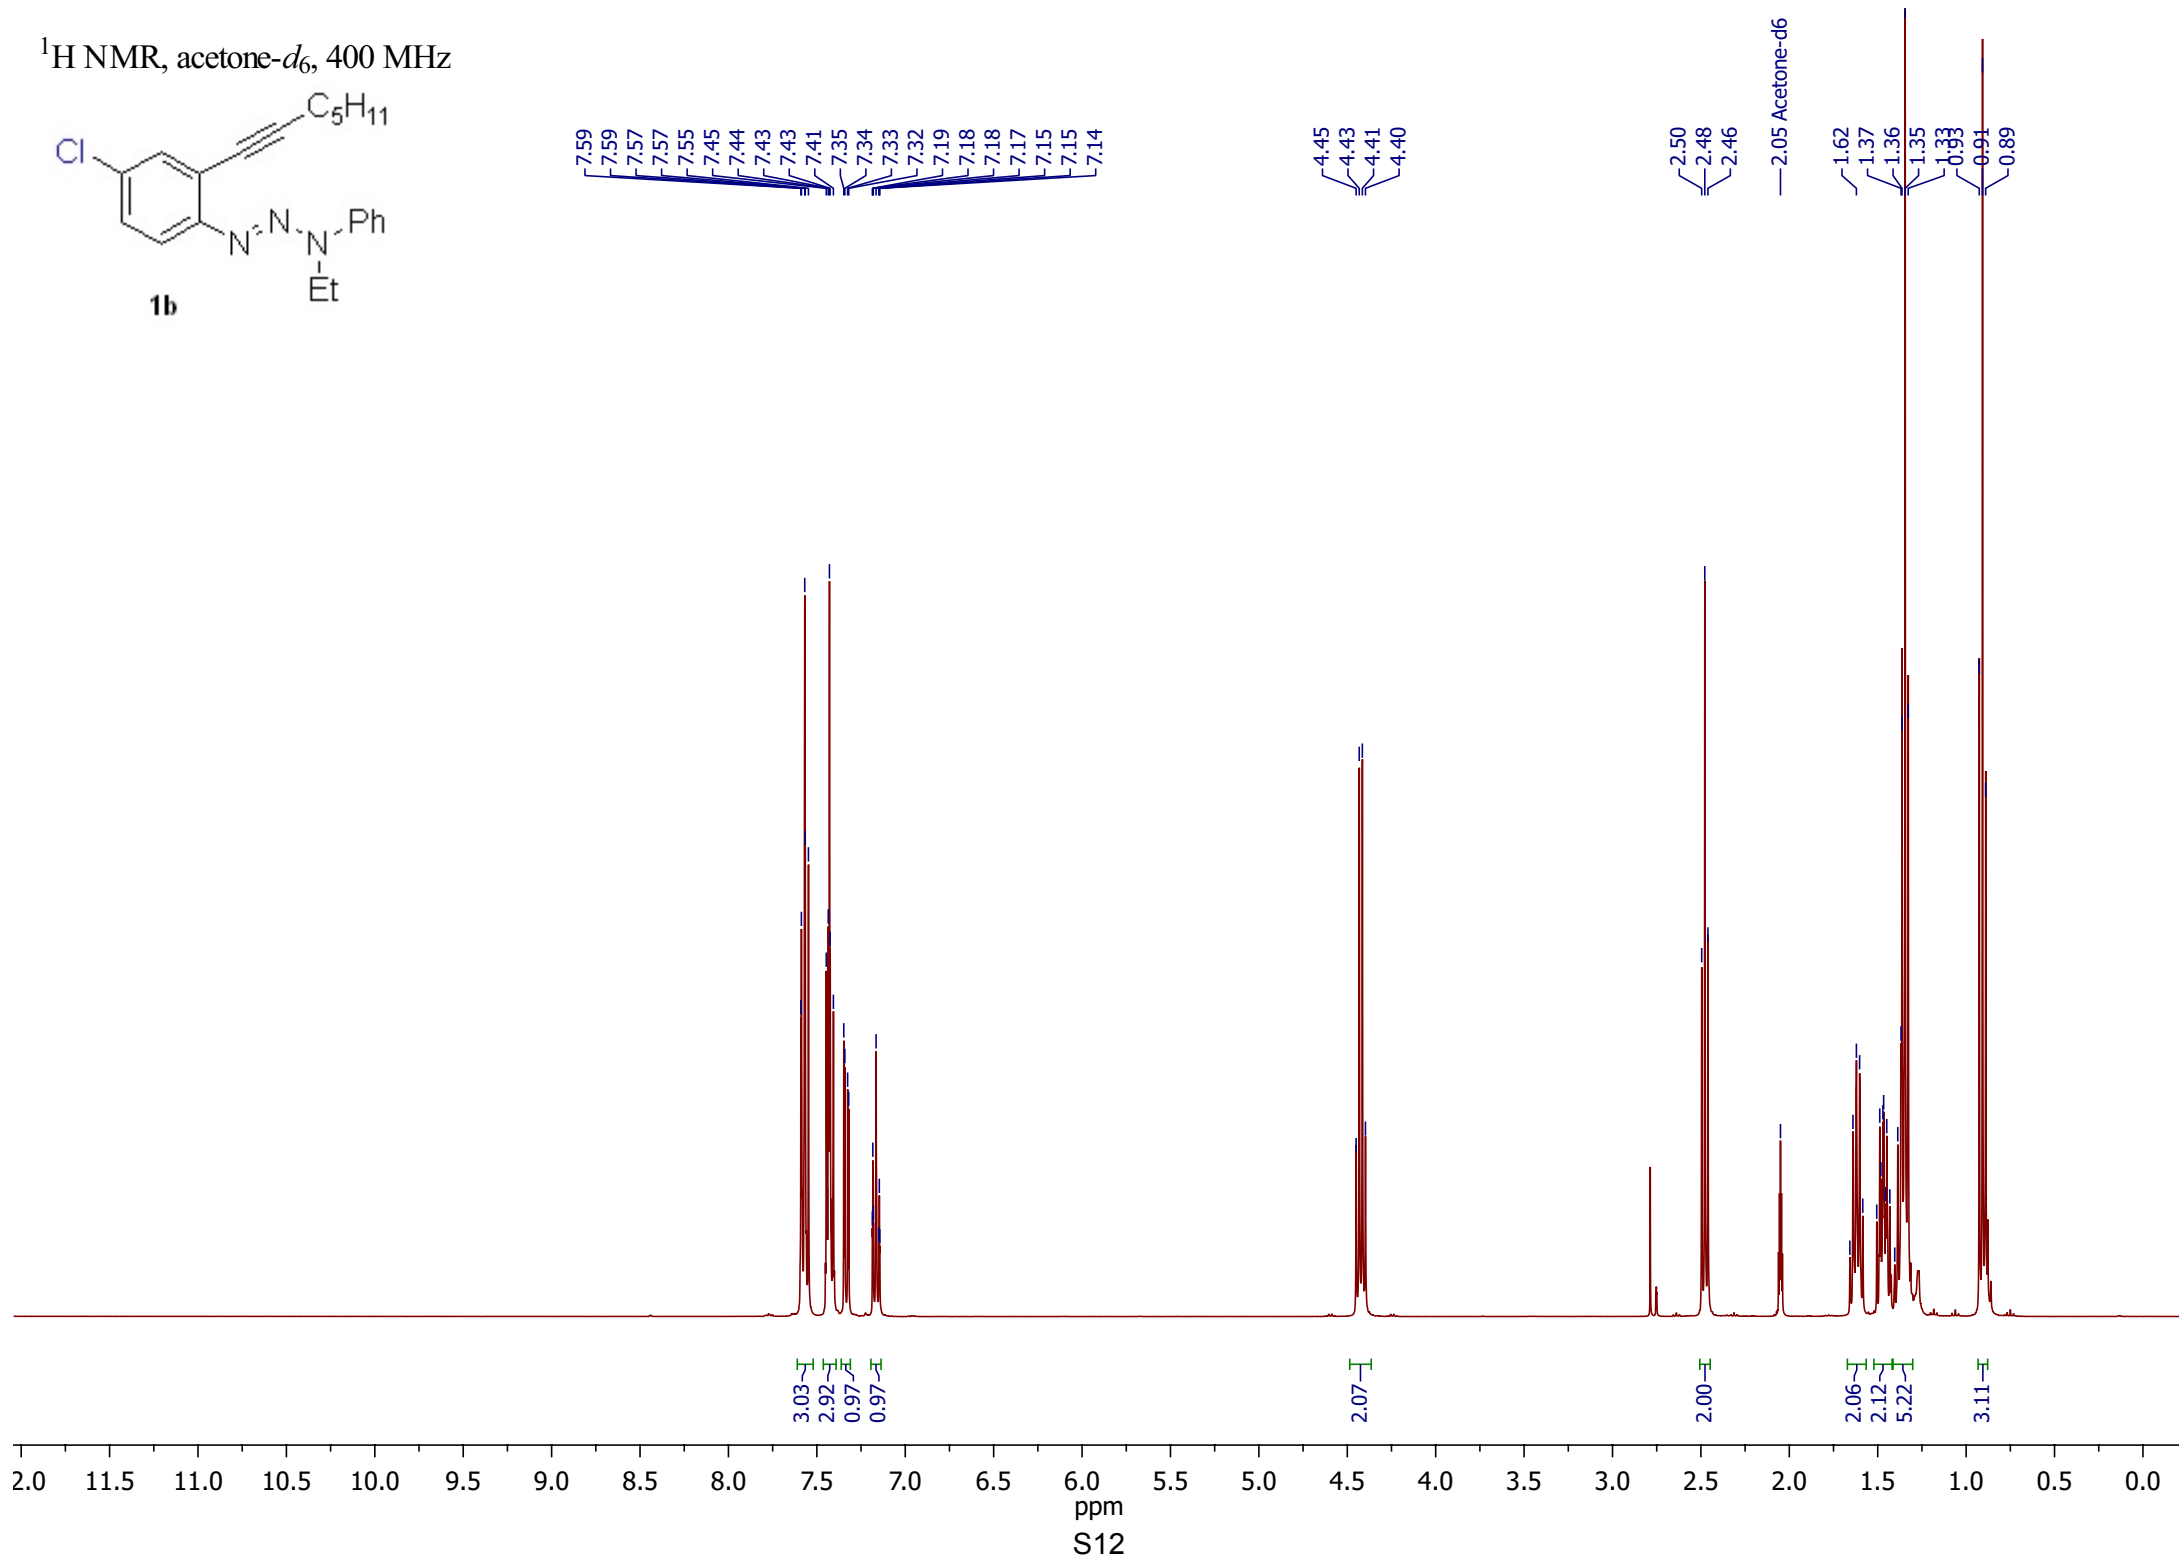

$^{13}\text{C}$  NMR, acetone- $d_6$ , 101 MHz

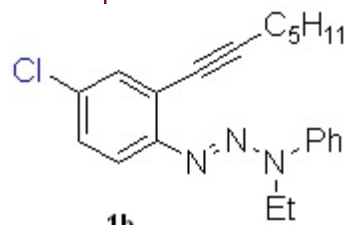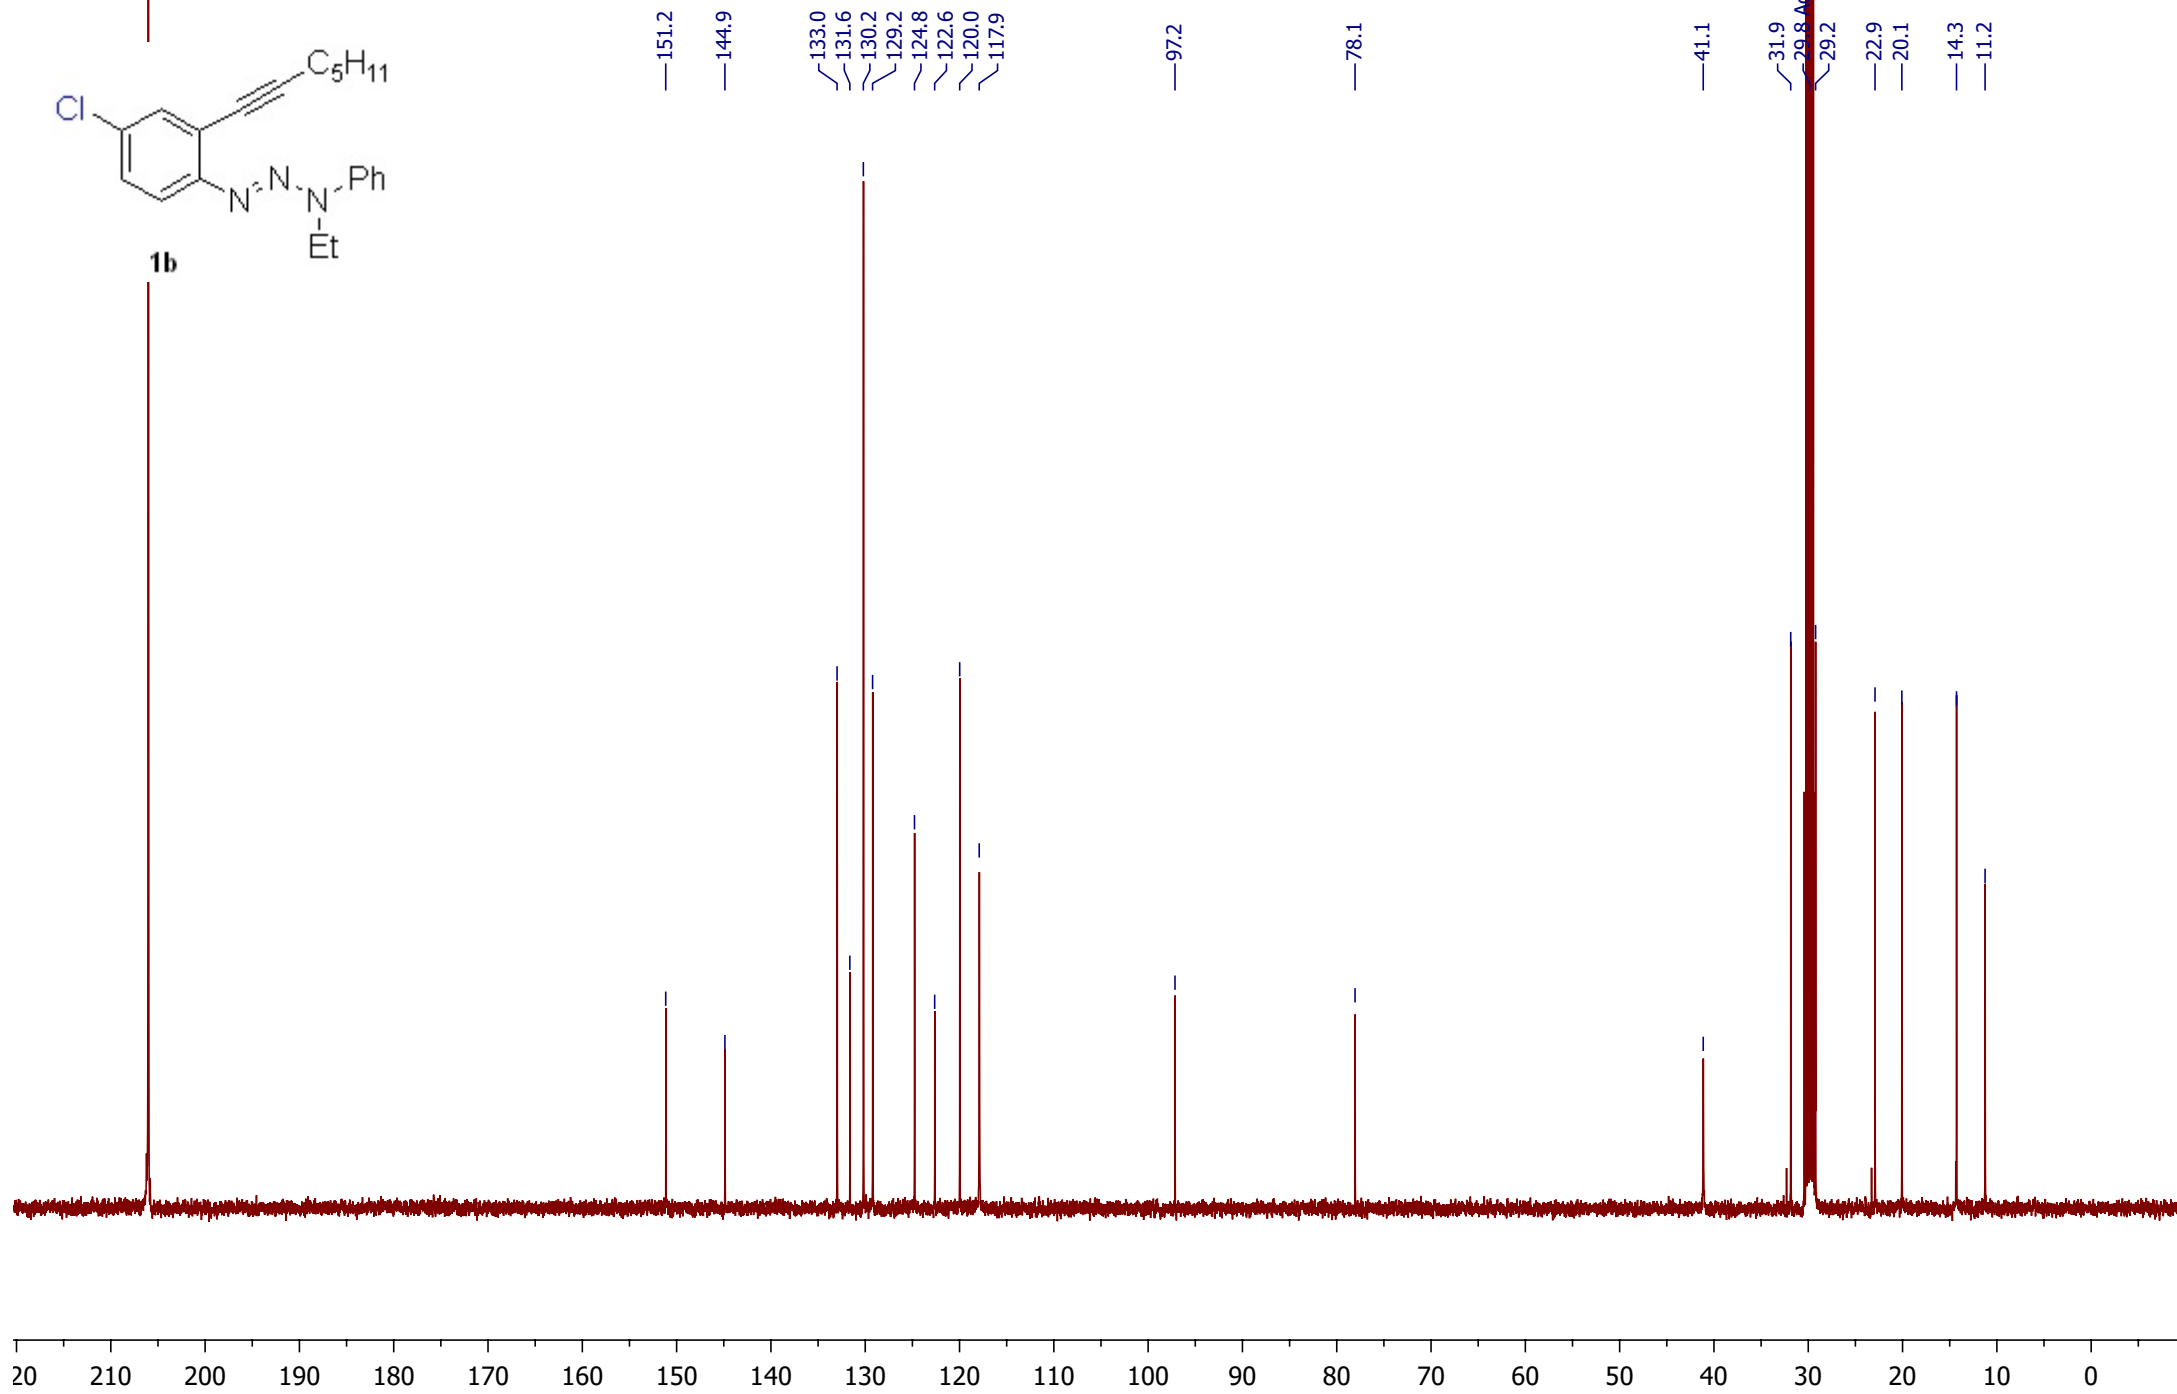

ppm

S13

DEPT NMR, acetone-*d*<sub>6</sub>, 101 MHz

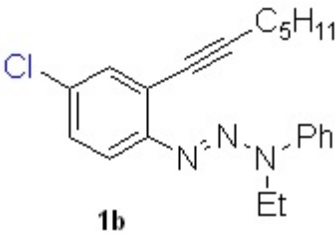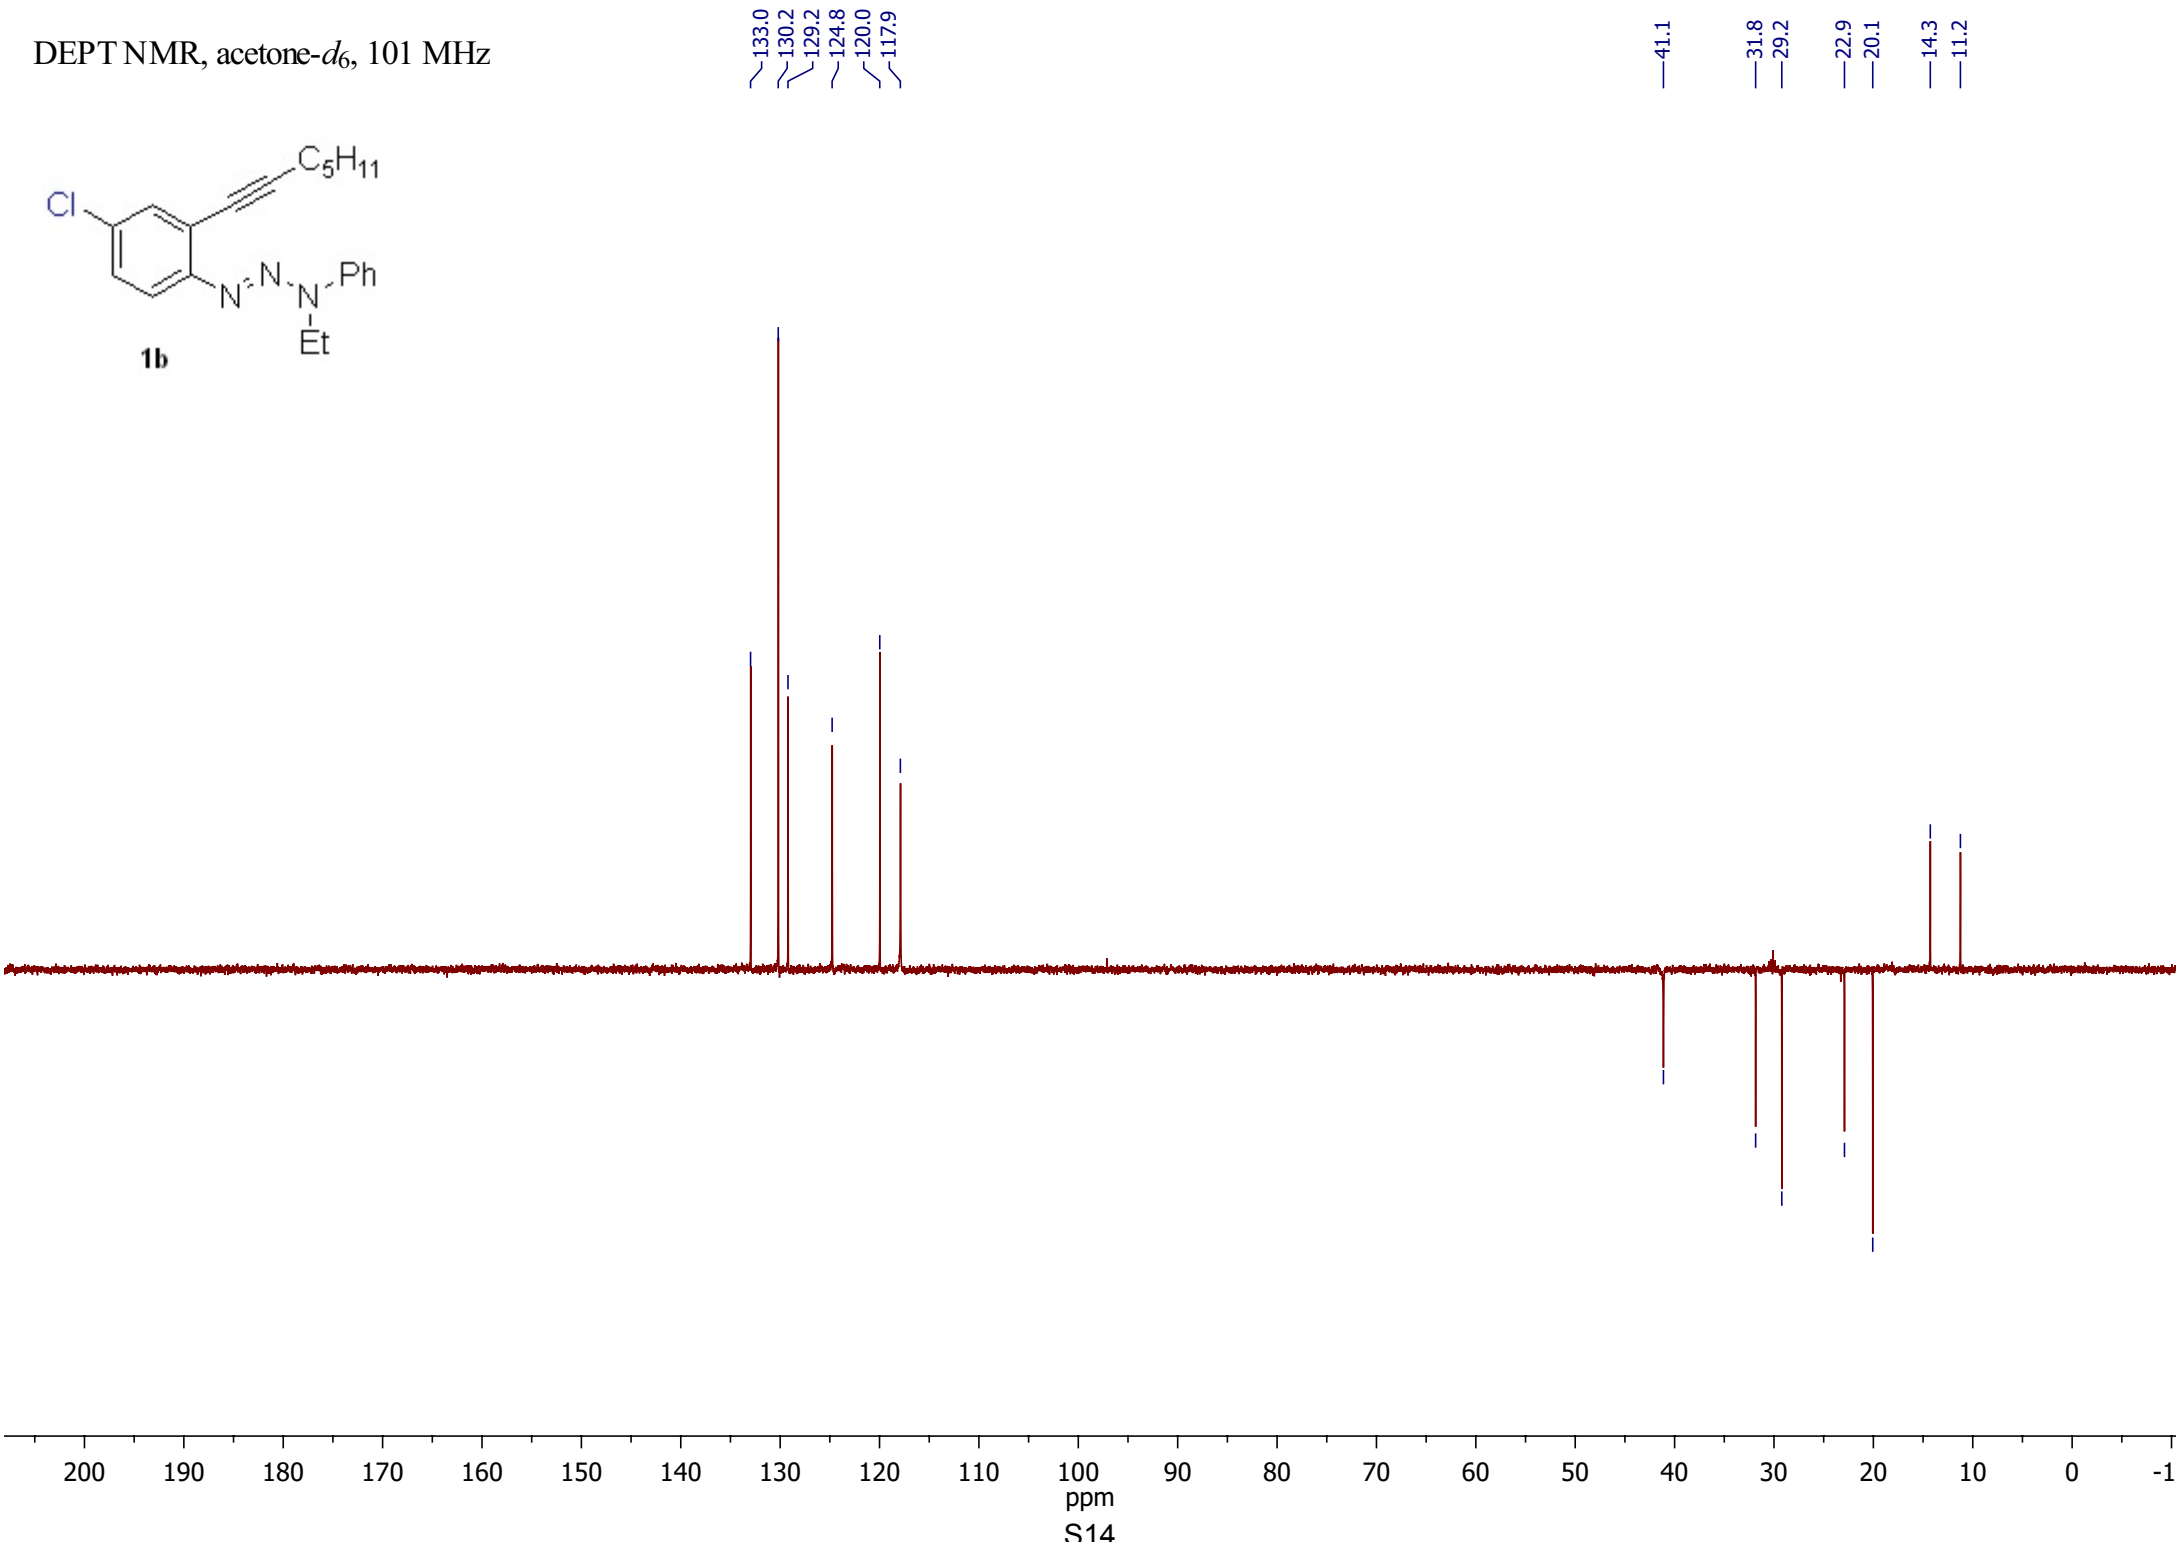

$^1\text{H}$  NMR, acetone- $d_6$ , 400 MHz

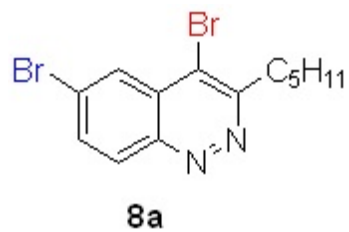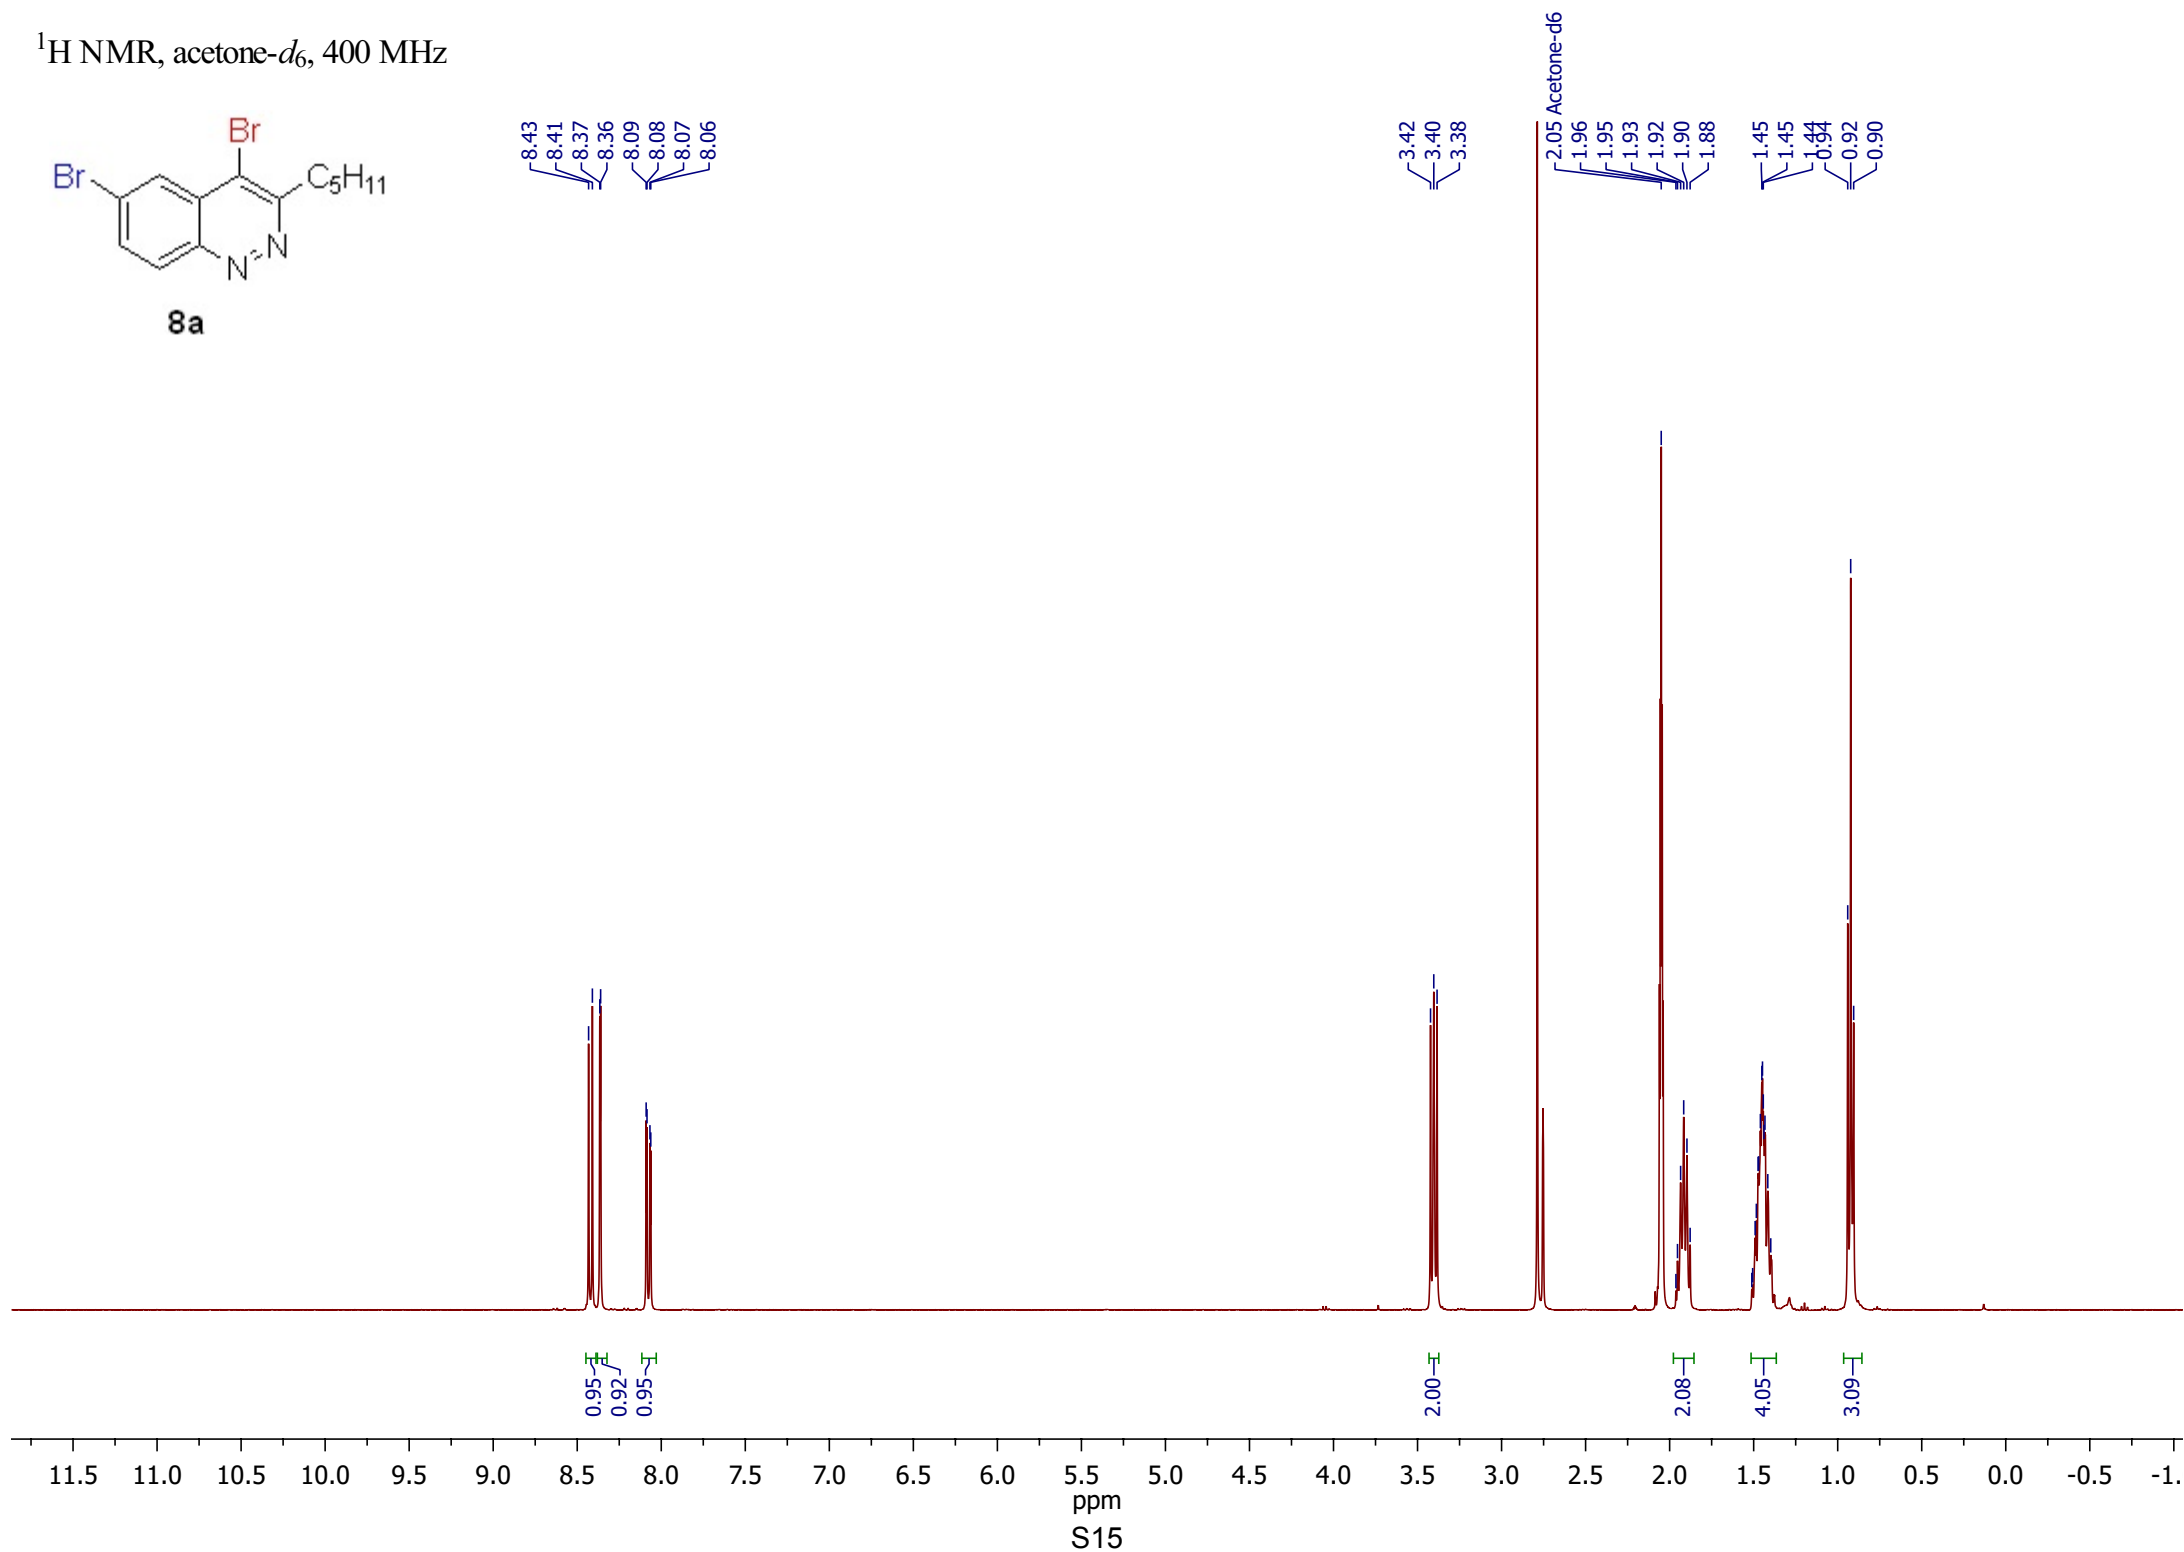

$^1\text{H}$  NMR, acetone- $d_6$ , 400 MHz

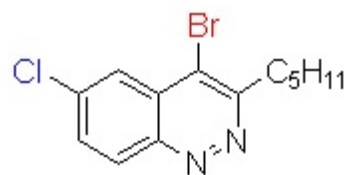

**8b**

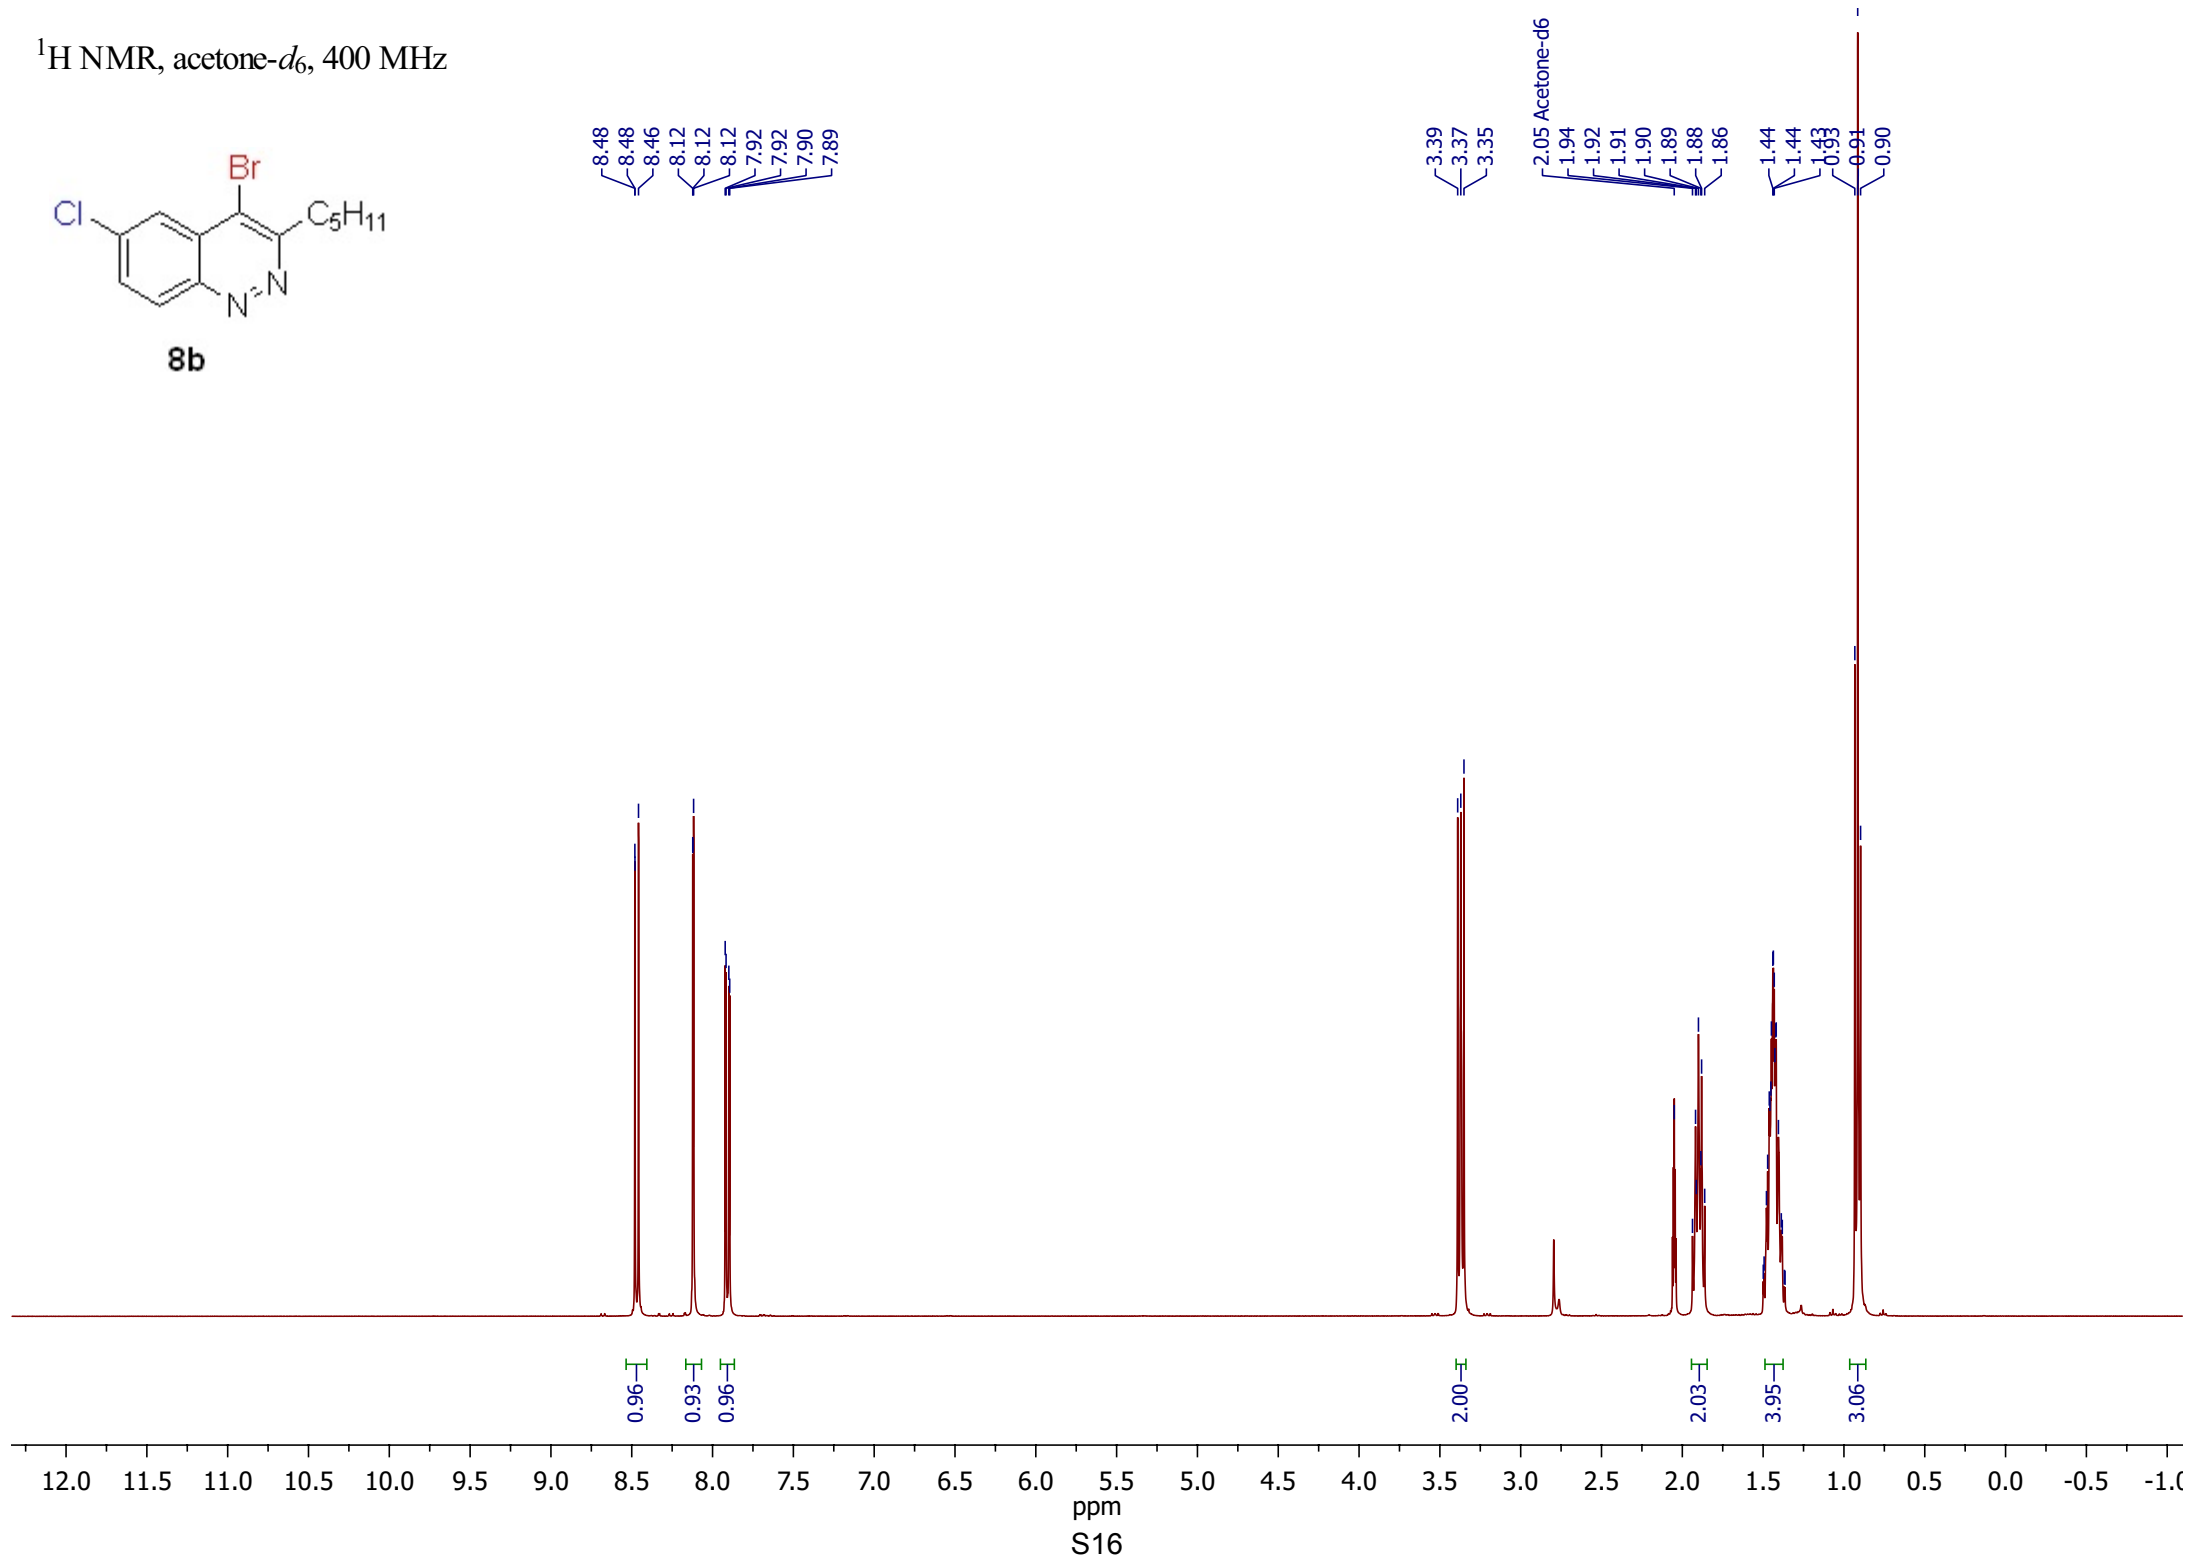



$^{13}\text{C}$  NMR, acetone- $d_6$ , 101 MHz

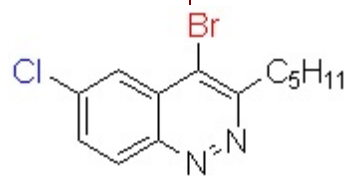

**8b**

— 158.5 — 148.8 — 139.3 — 133.0 — 132.4 — 128.1 — 125.7 — 125.3 — 36.8 — 32.3 — 29.8 — 29.3 — 23.1 — 14.3

230 220 210 200 190 180 170 160 150 140 130 120 110 100 90 80 70 60 50 40 30 20 10 0 -10

ppm

S17

DEPT NMR, acetone-*d*<sub>6</sub>, 101 MHz

133.0  
132.4  
125.3

36.8  
32.3  
29.3  
23.1  
14.3

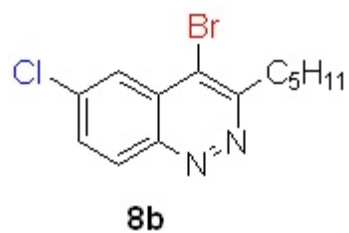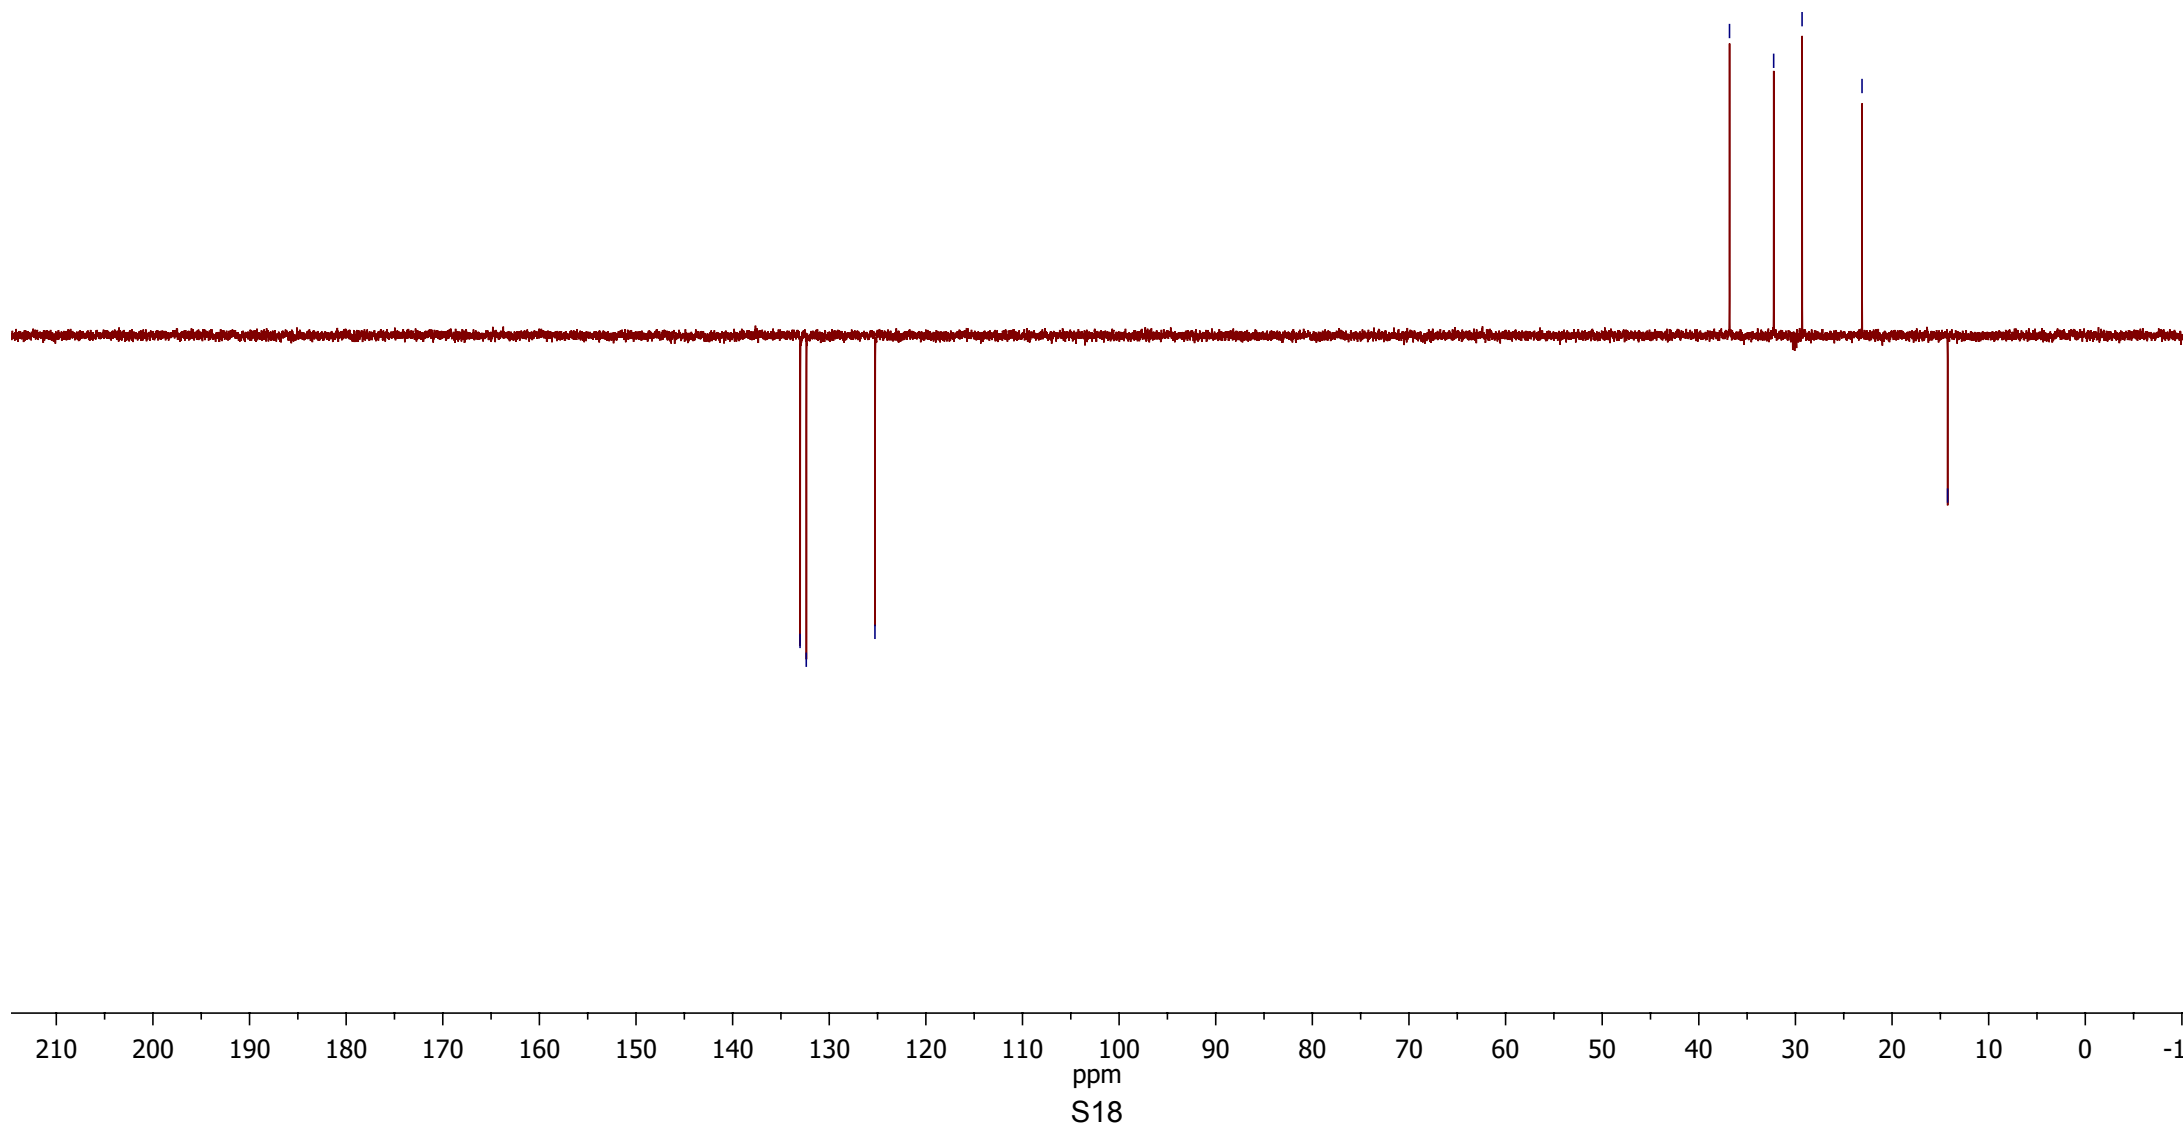

$^1\text{H}$  NMR, acetone- $d_6$ , 400 MHz

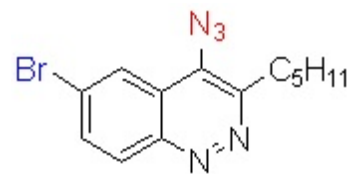

**9a**

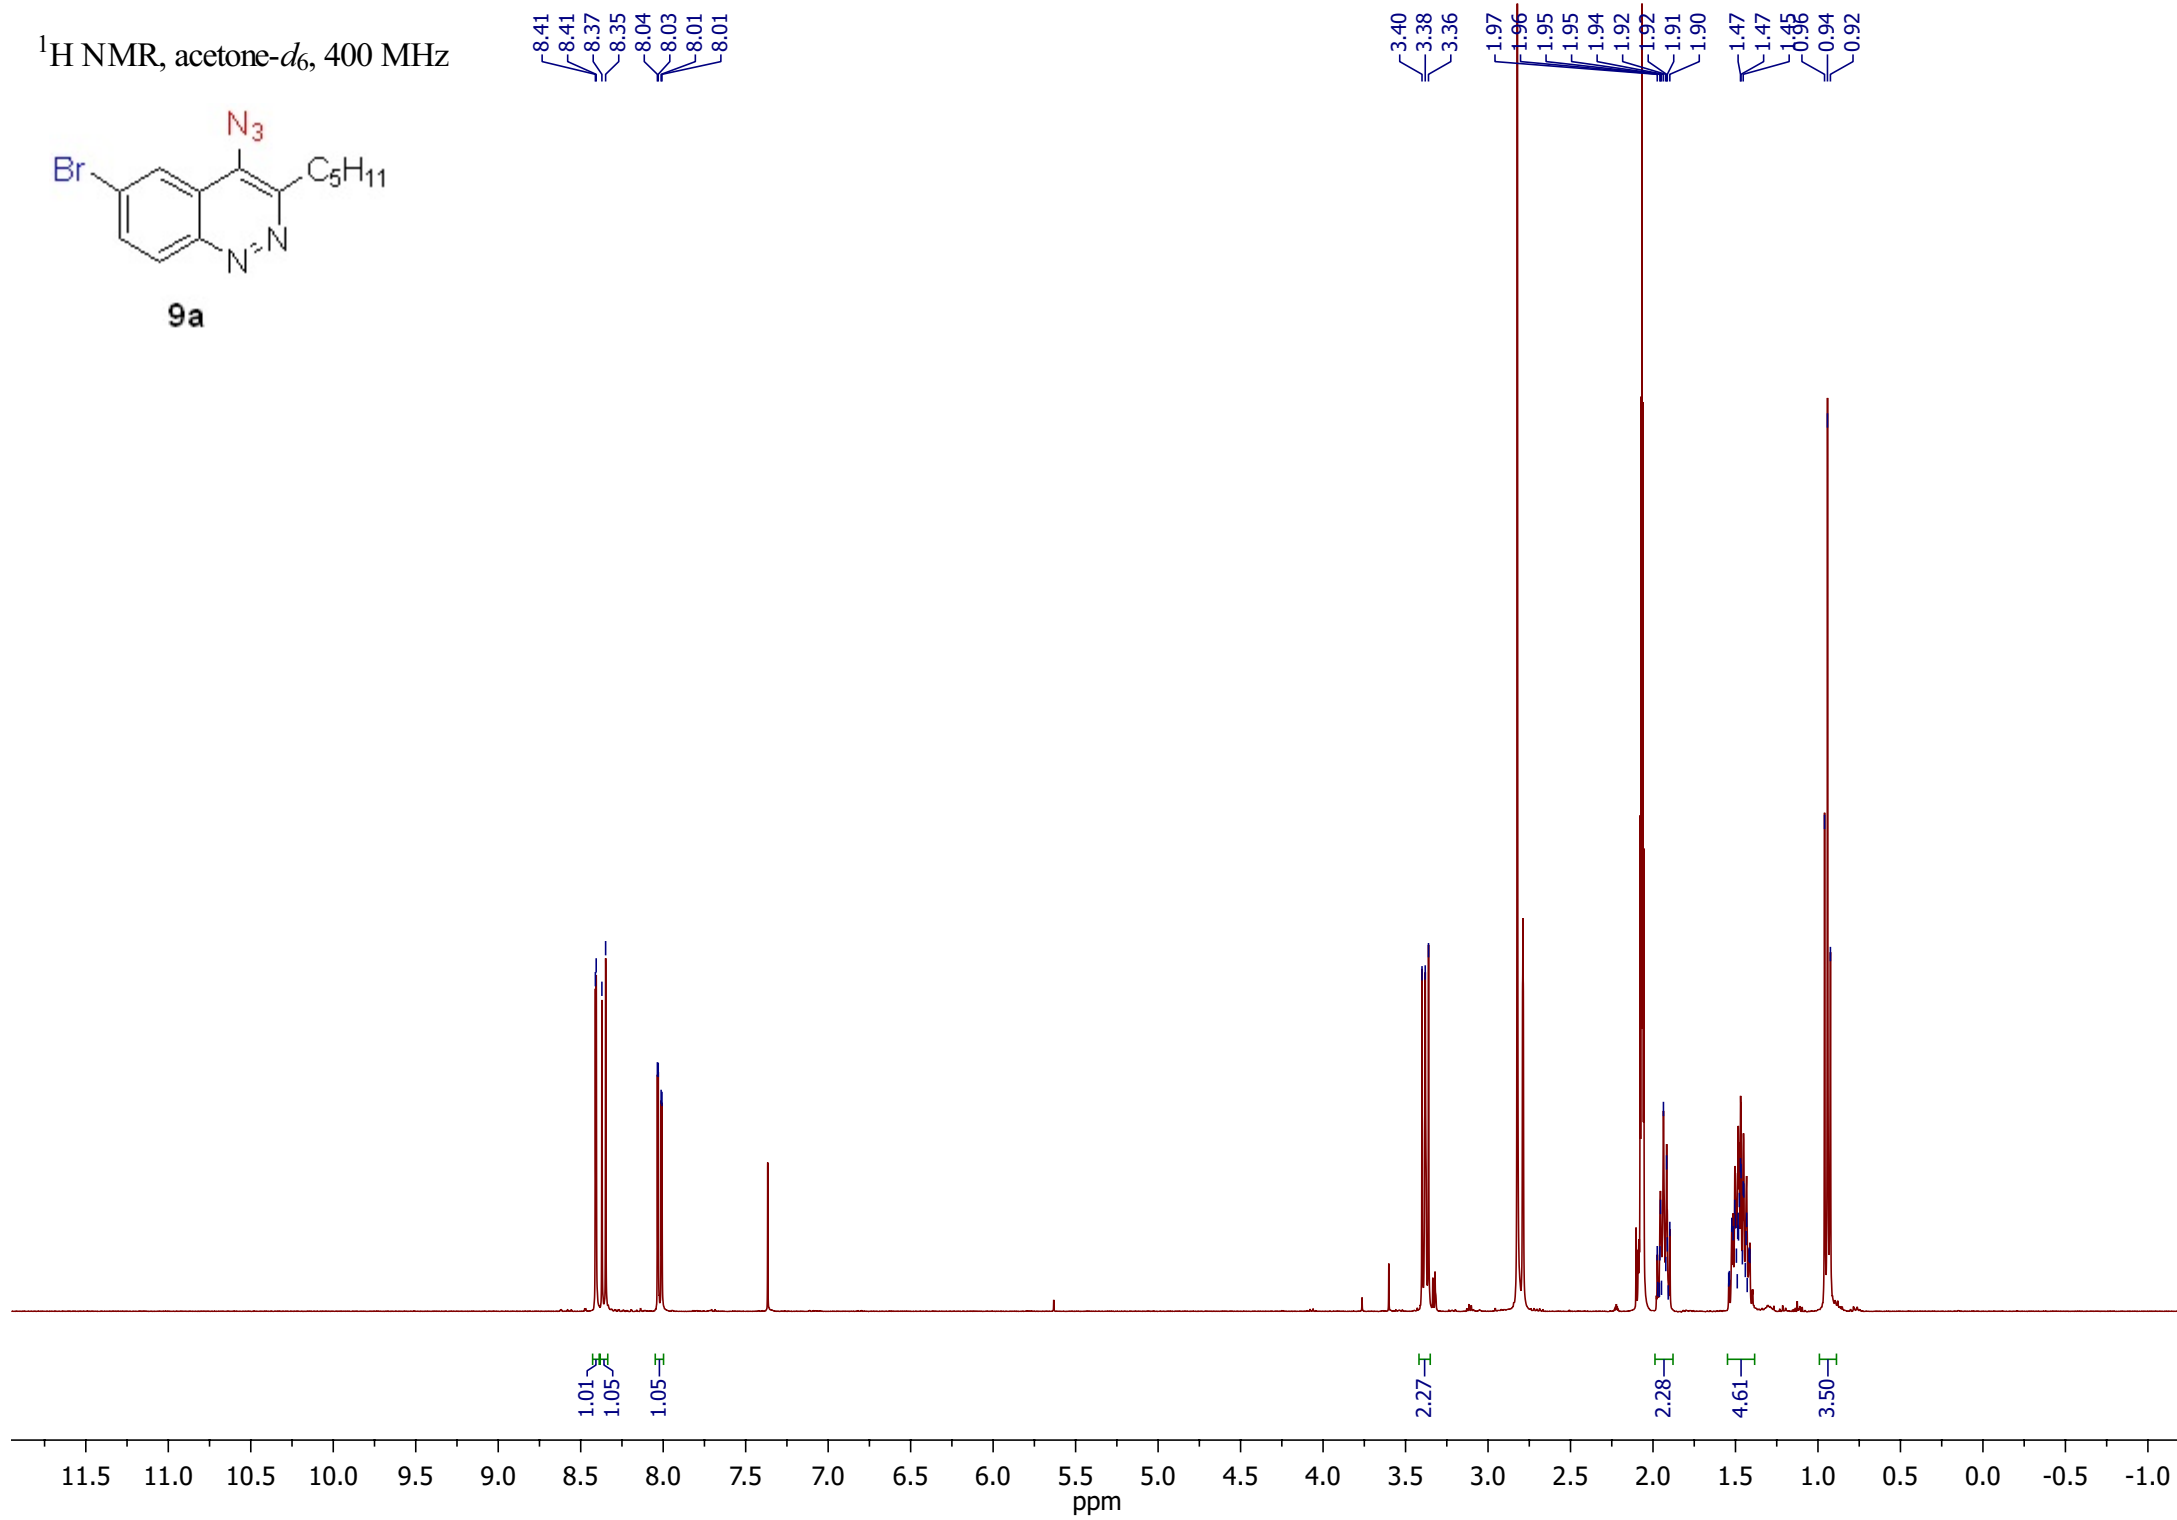

$^1\text{H}$  NMR, acetone- $d_6$ , 400 MHz

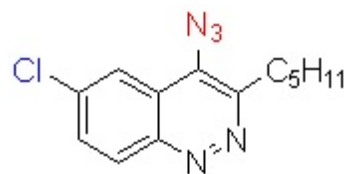

**9b**

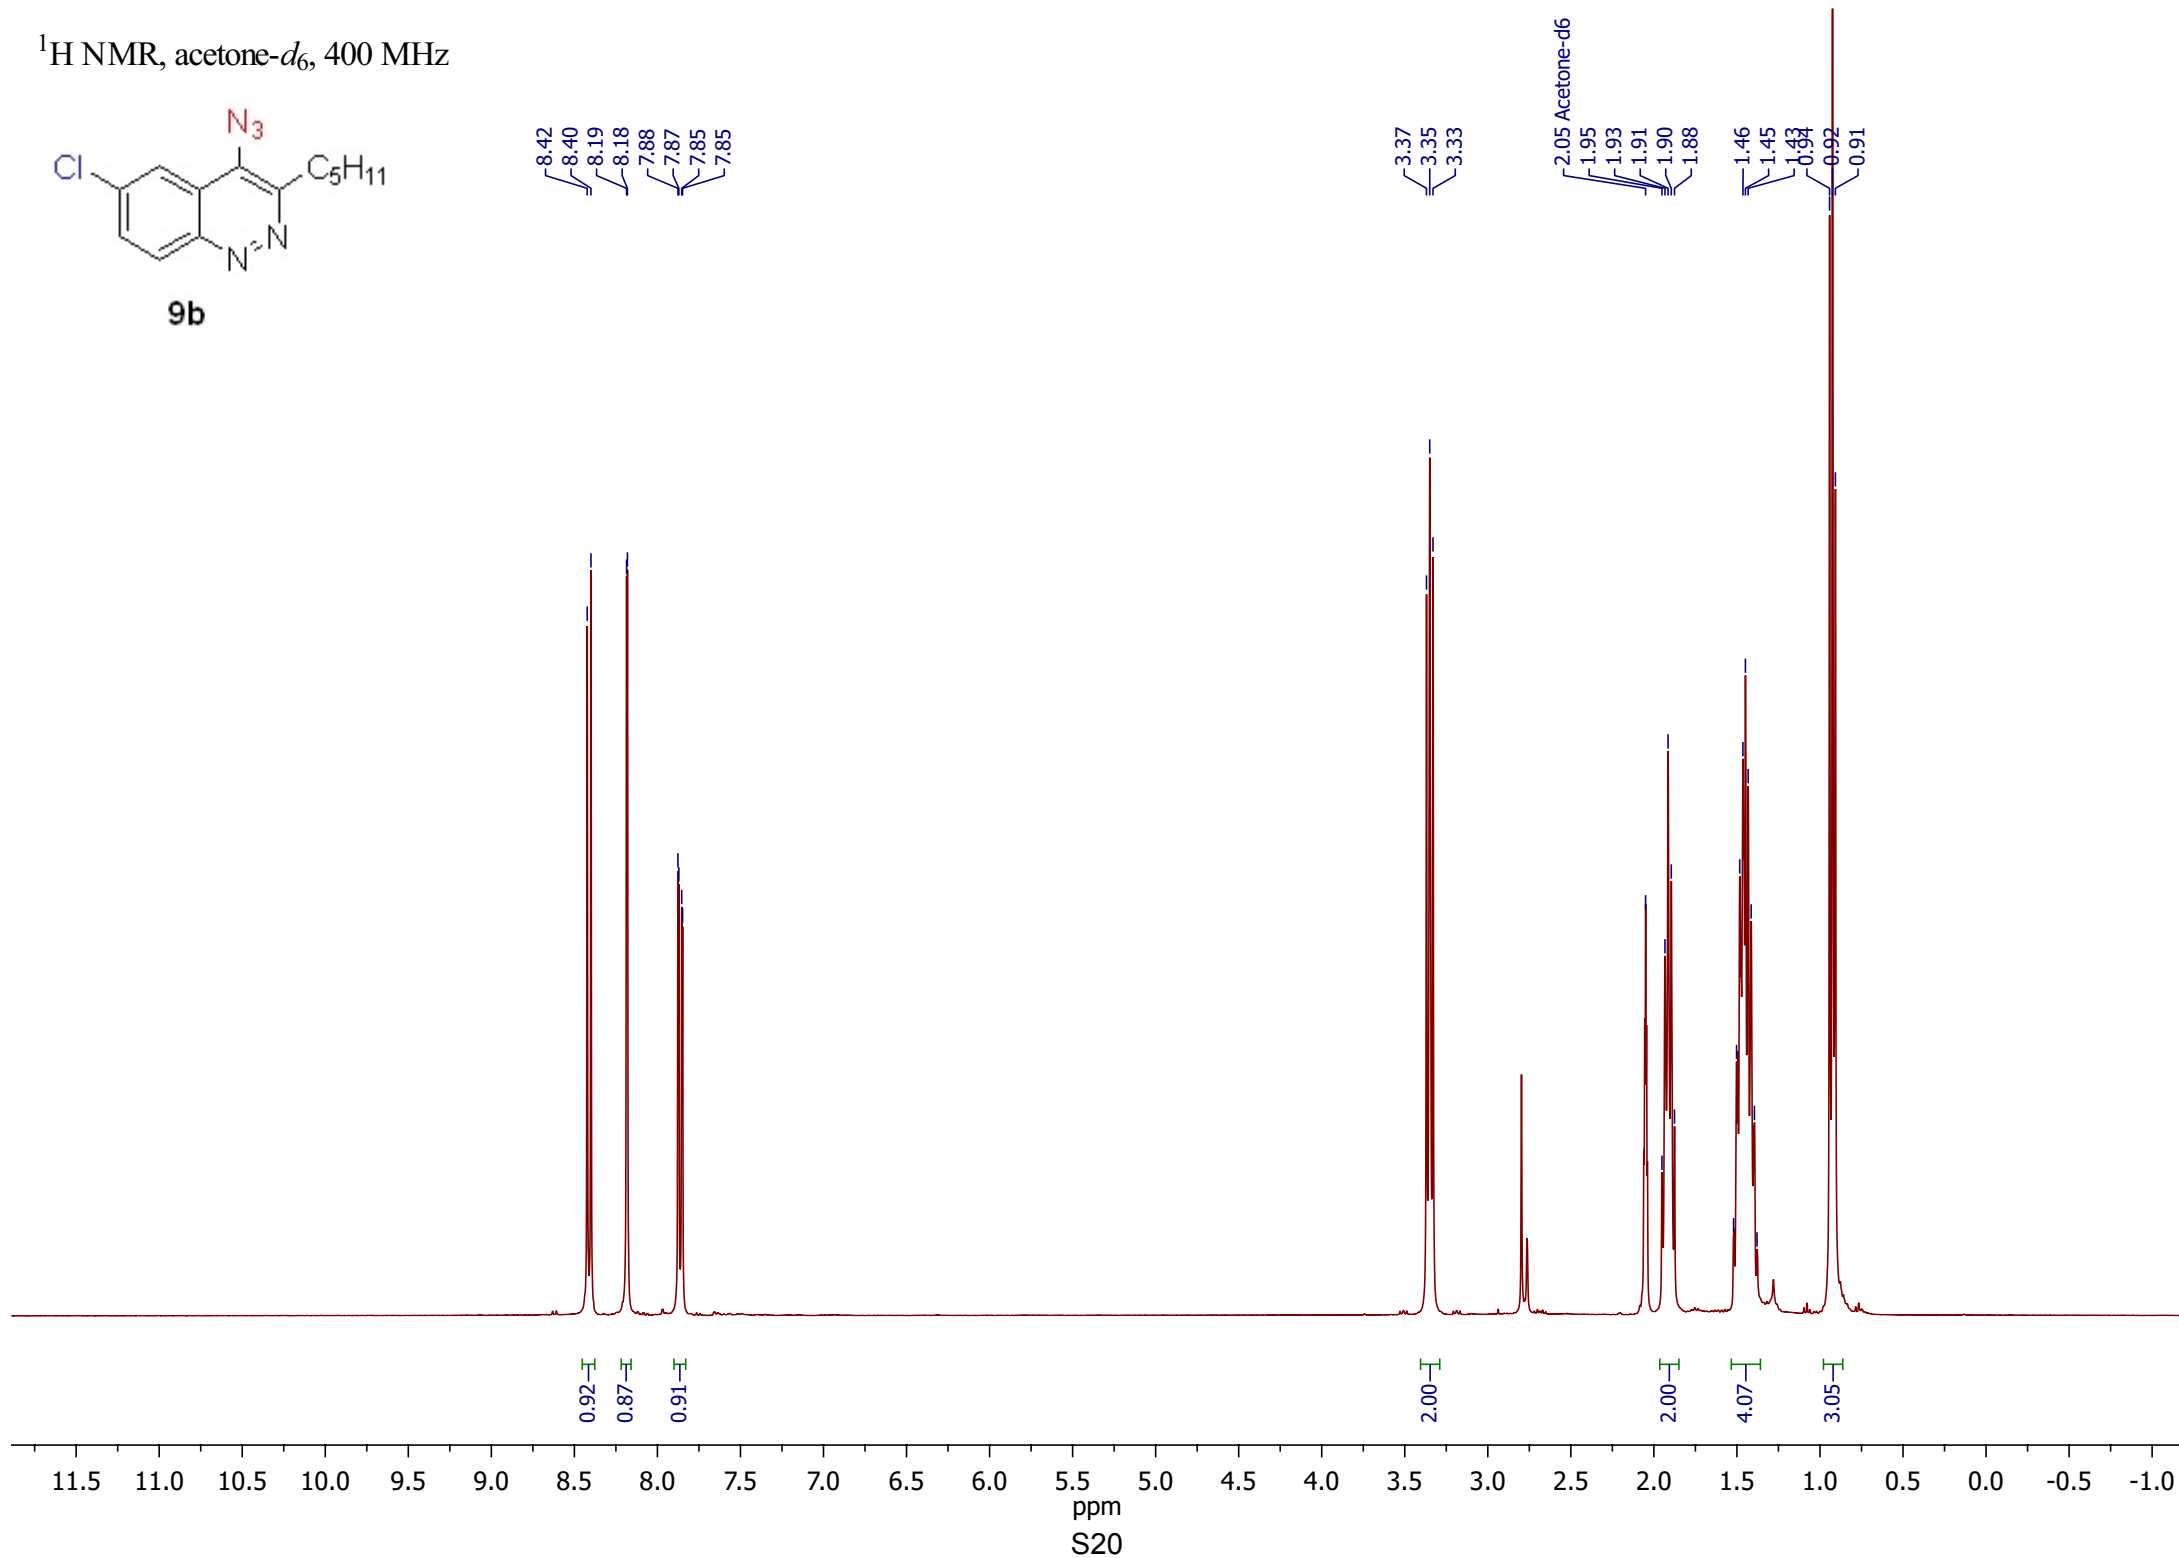

$^{13}\text{C}$  NMR, acetone- $d_6$ , 101 MHz

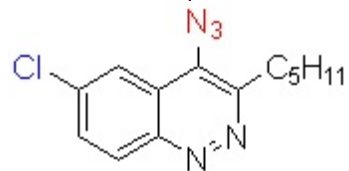

**9b**

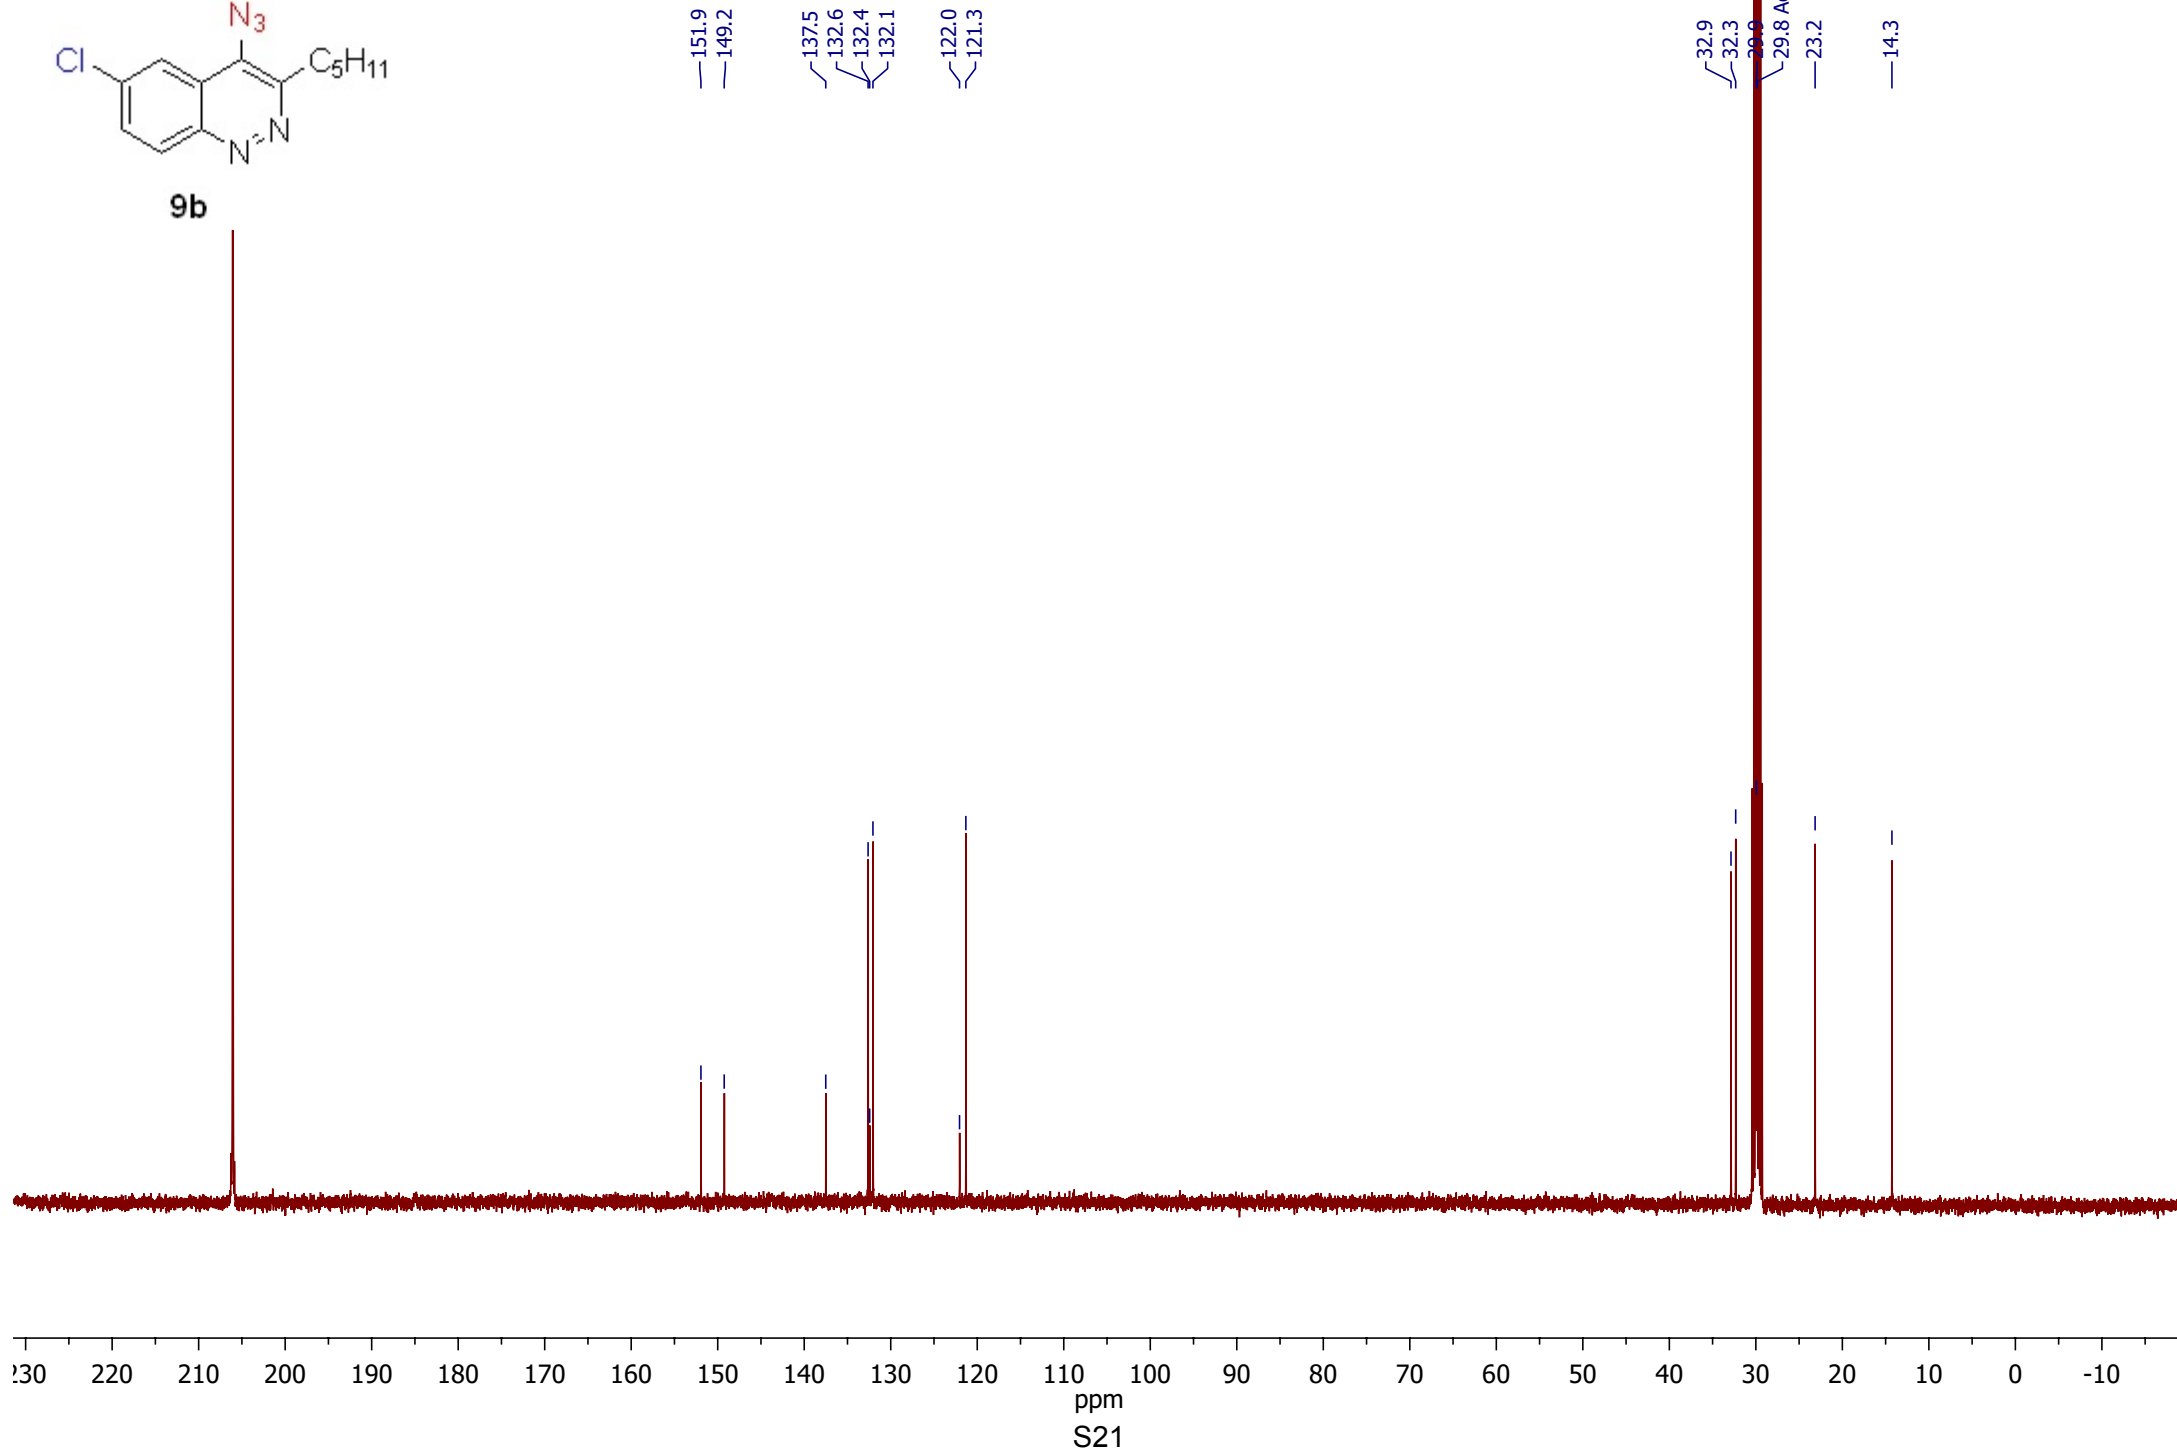

DEPT NMR, acetone-*d*<sub>6</sub>, 101 MHz

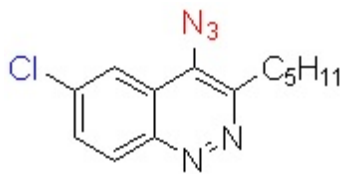

9b

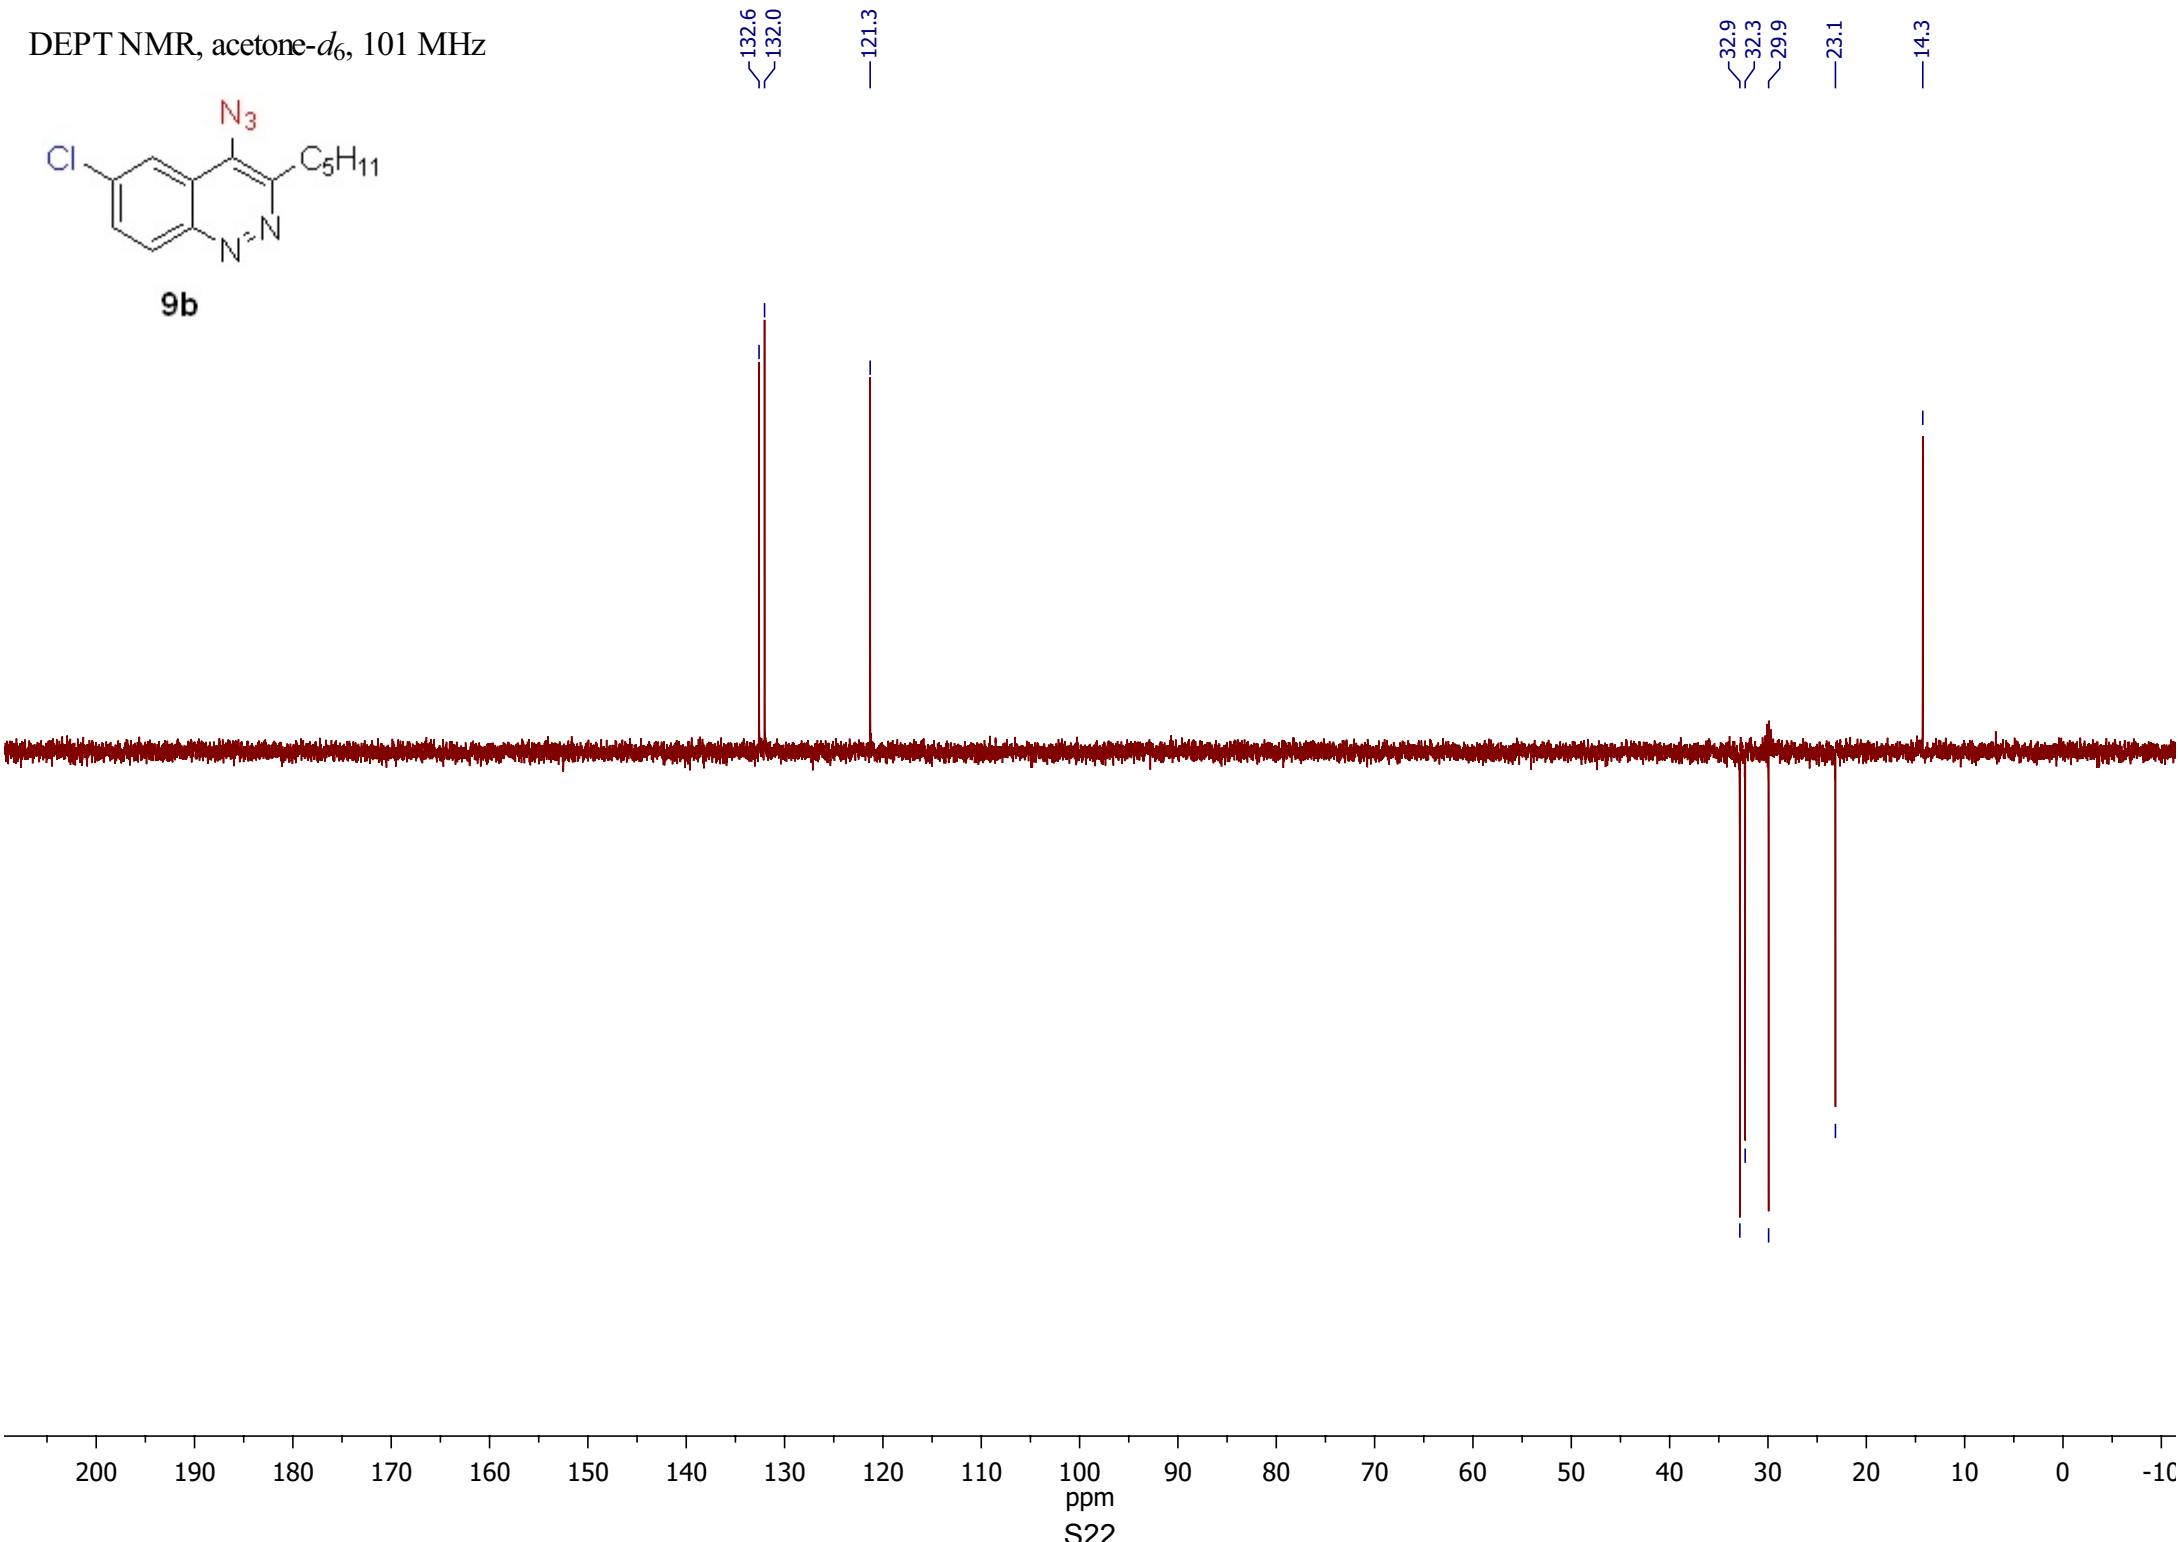

$^1\text{H}$  NMR, DMSO- $d_6$ , 400 MHz

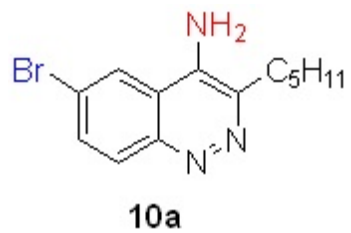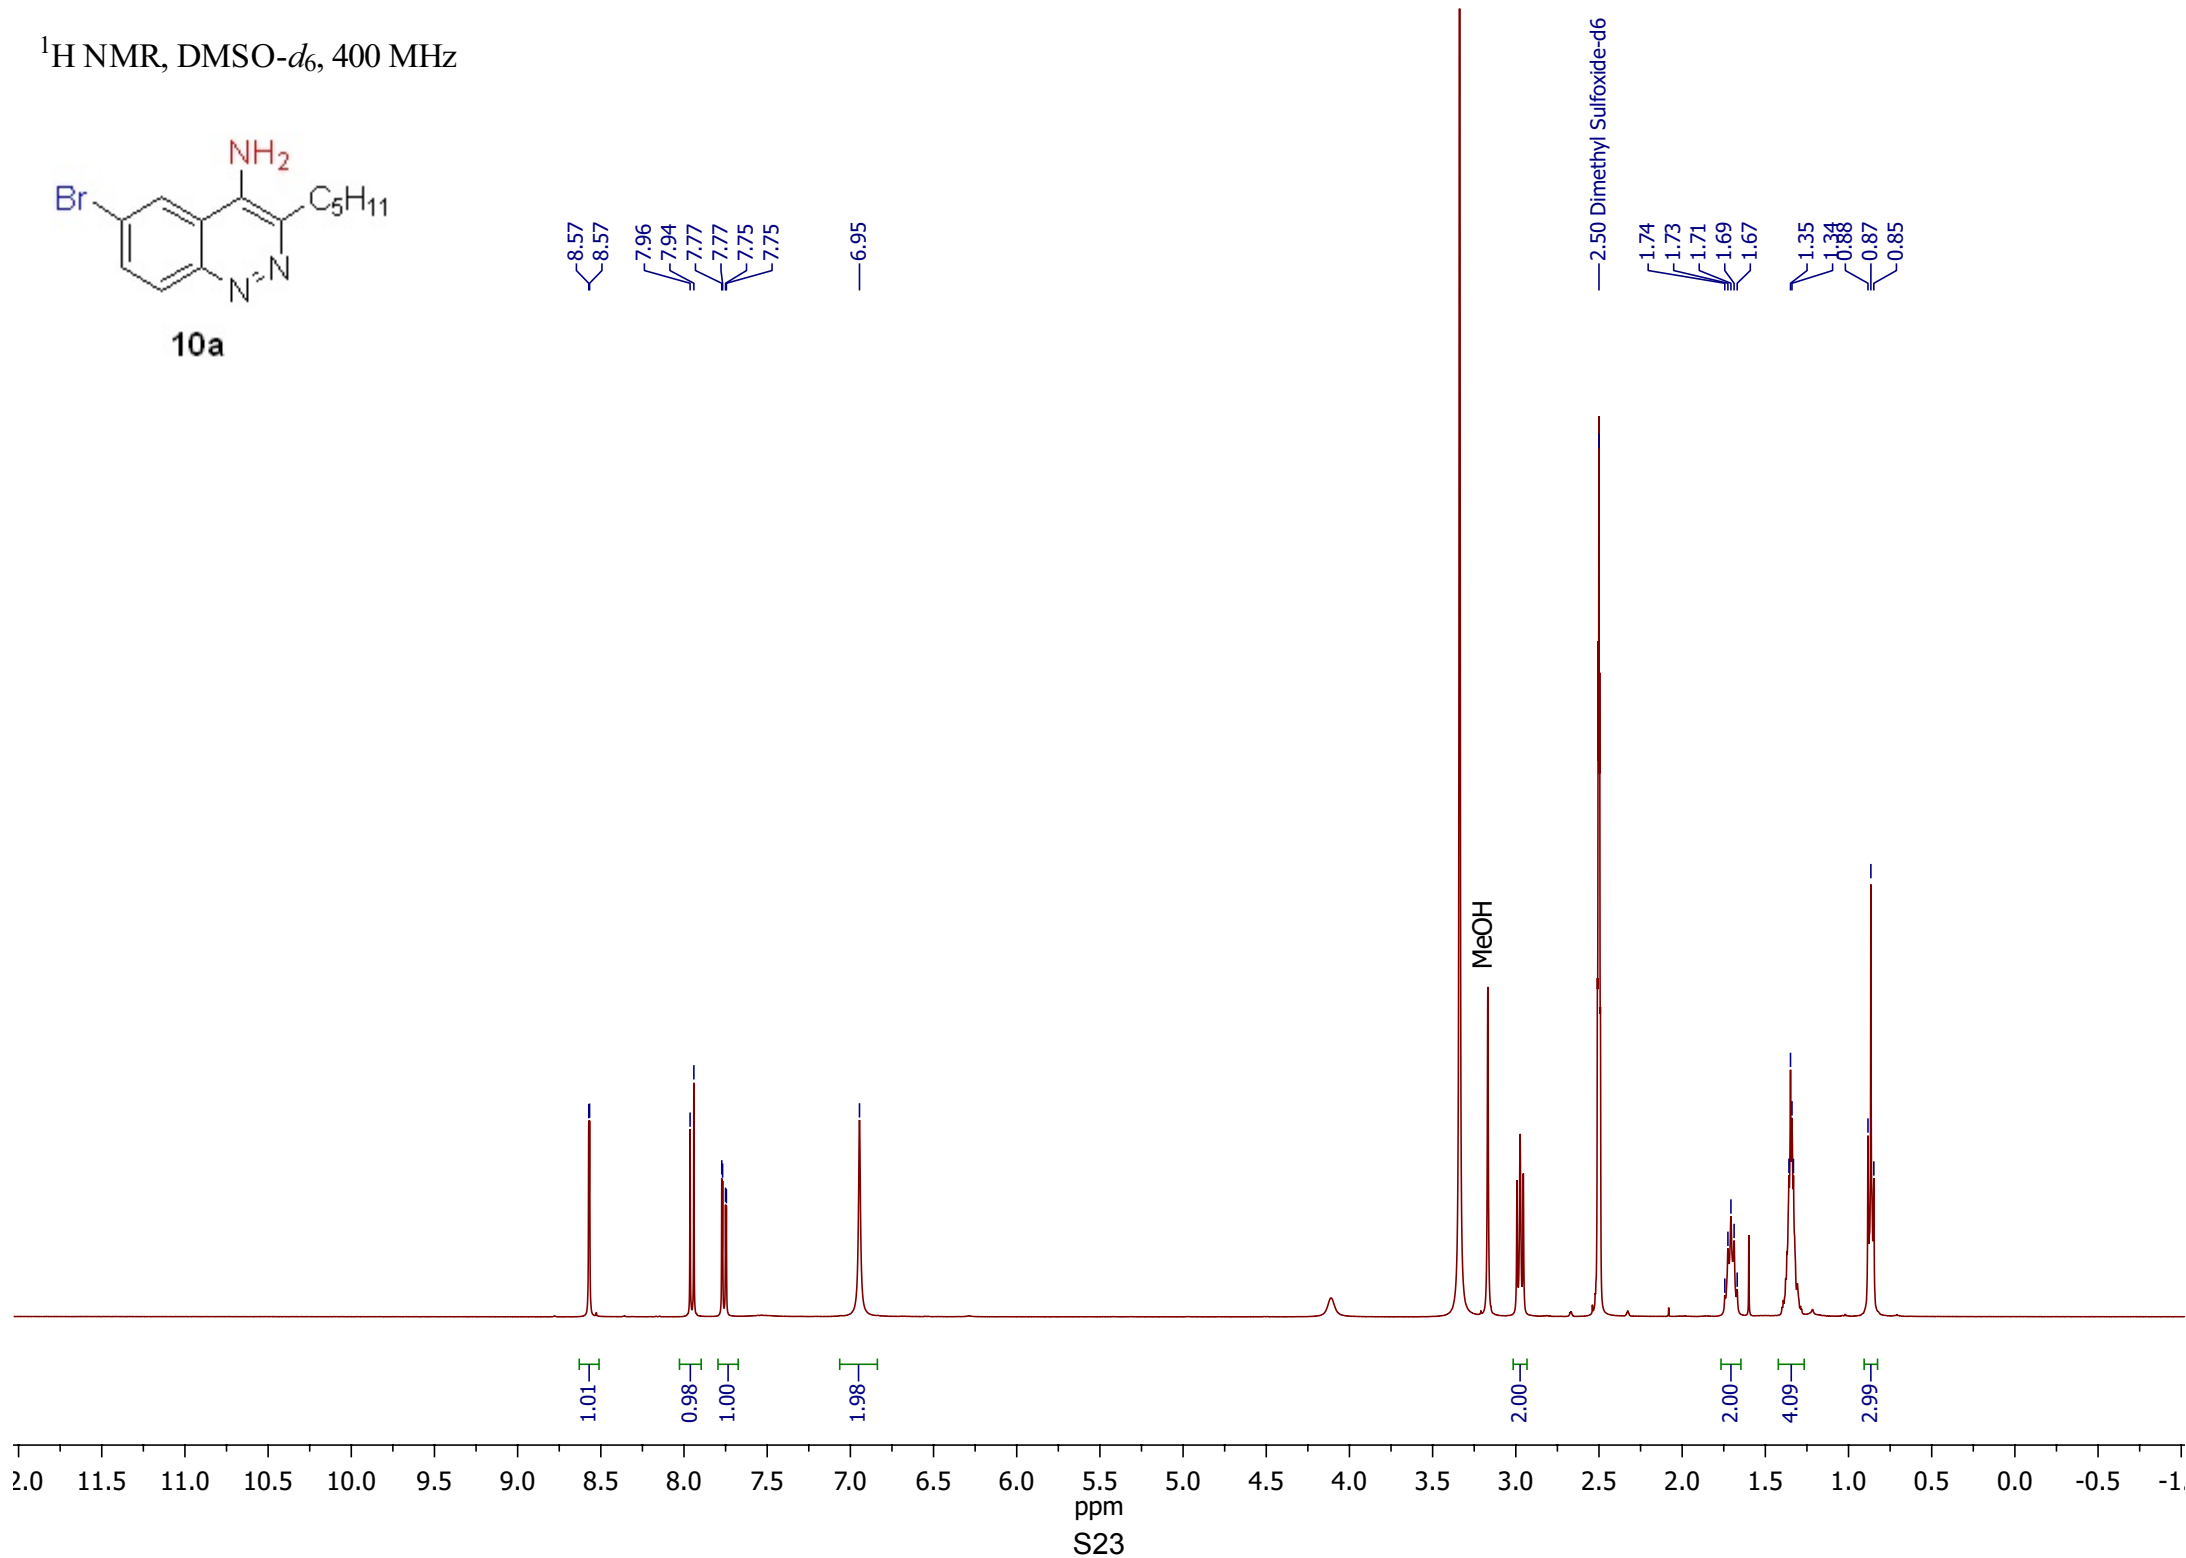

$^{13}\text{C}$  NMR, DMSO- $d_6$ , 101 MHz

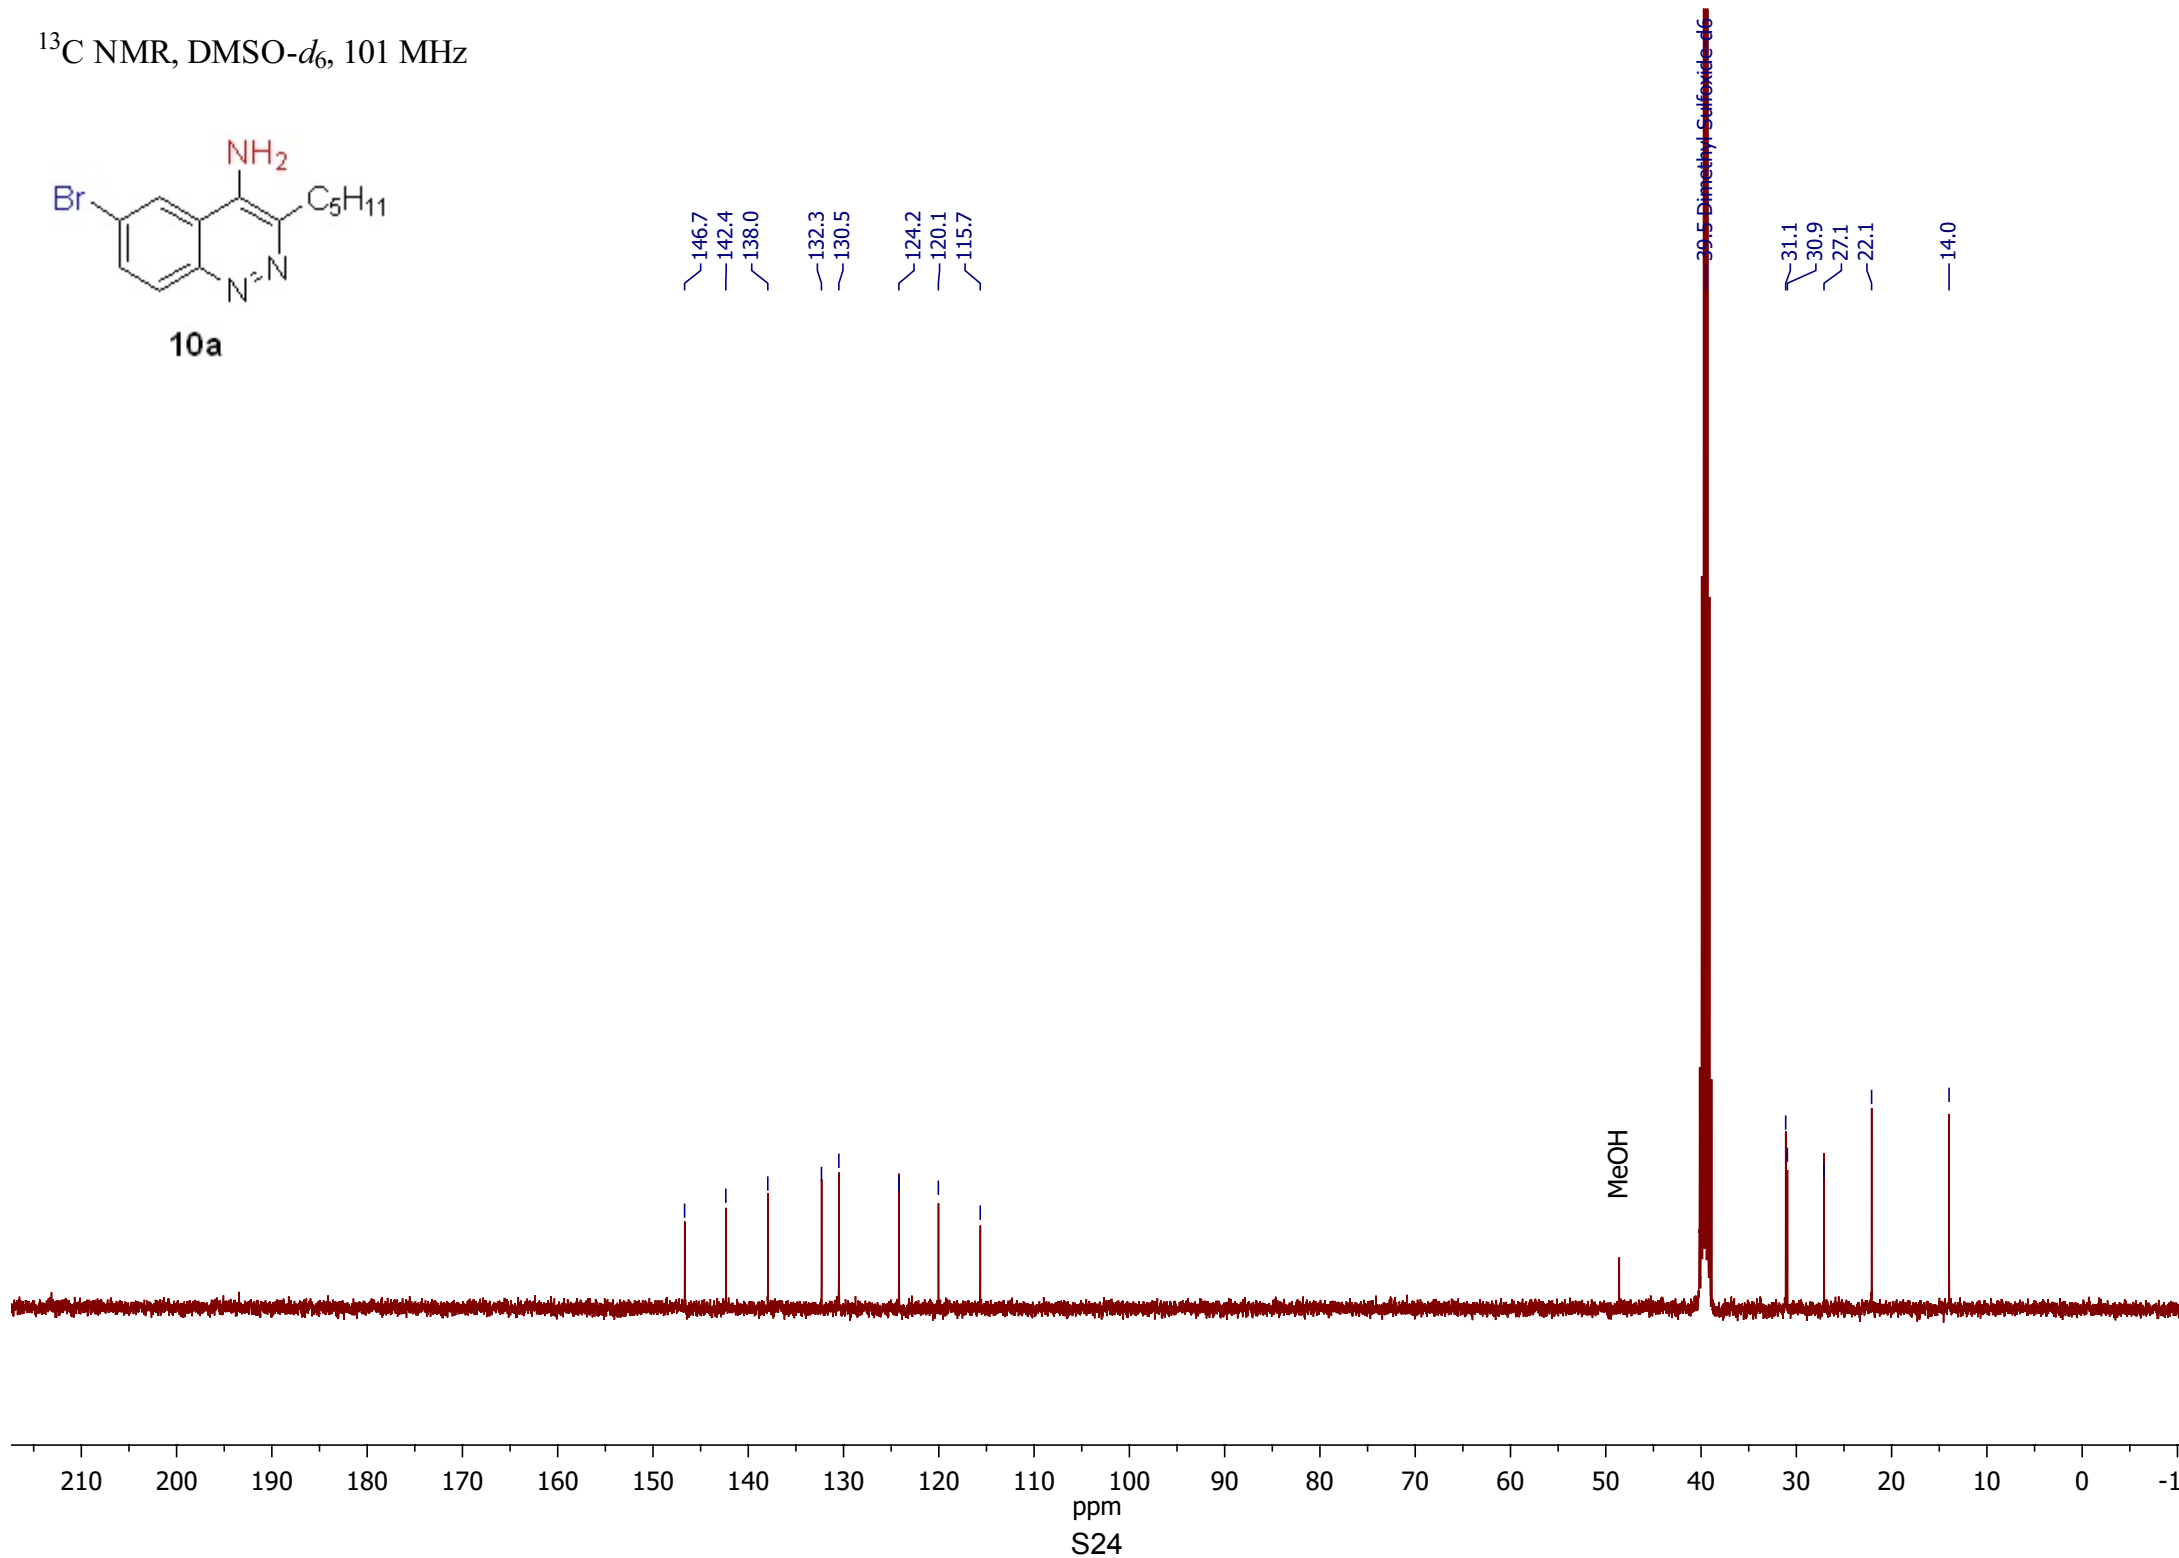



DEPT NMR, DMSO-*d*<sub>6</sub>, 101 MHz

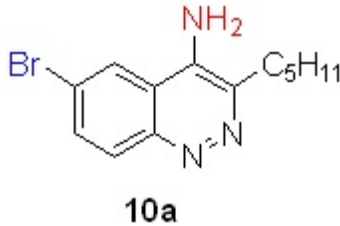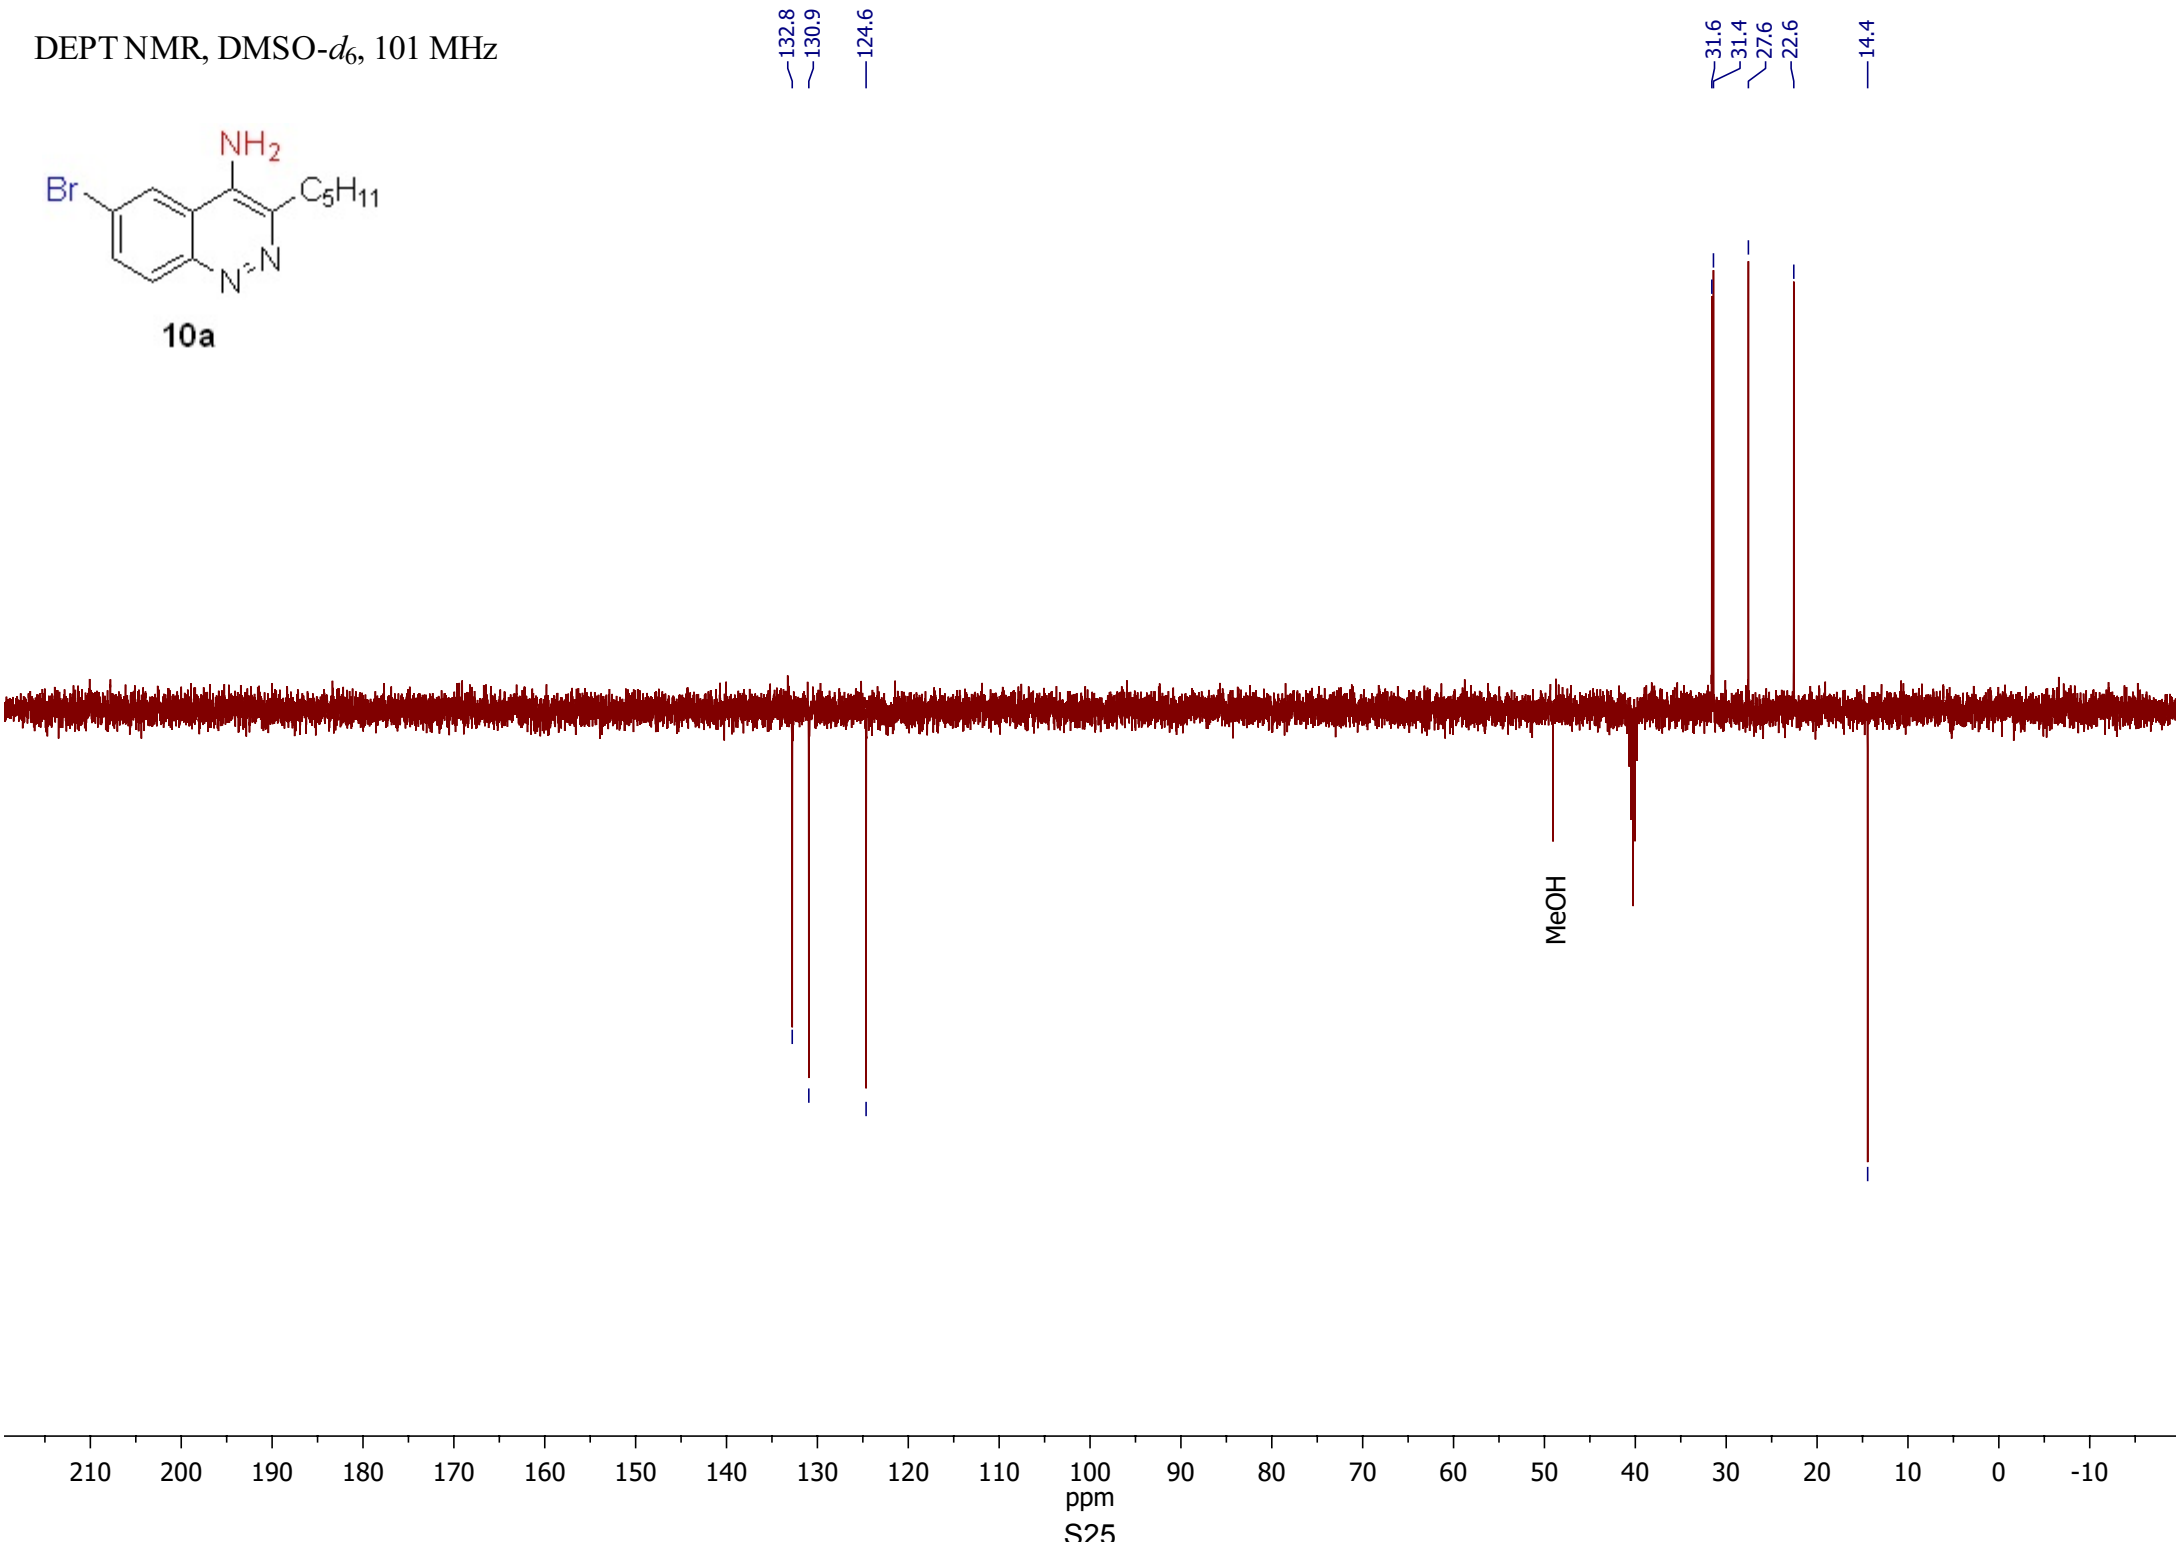

$^1\text{H}$  NMR, DMSO- $d_6$ , 400 MHz

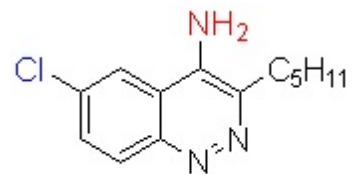

**10b**

8.42  
8.41  
8.05  
8.03  
7.67  
7.66  
7.65  
7.64

6.94

3.17  
3.00  
2.98  
2.96

2.50 Dimethyl Sulfoxide- $d_6$

1.73  
1.71  
1.70  
1.36  
1.35  
0.89  
0.87  
0.85

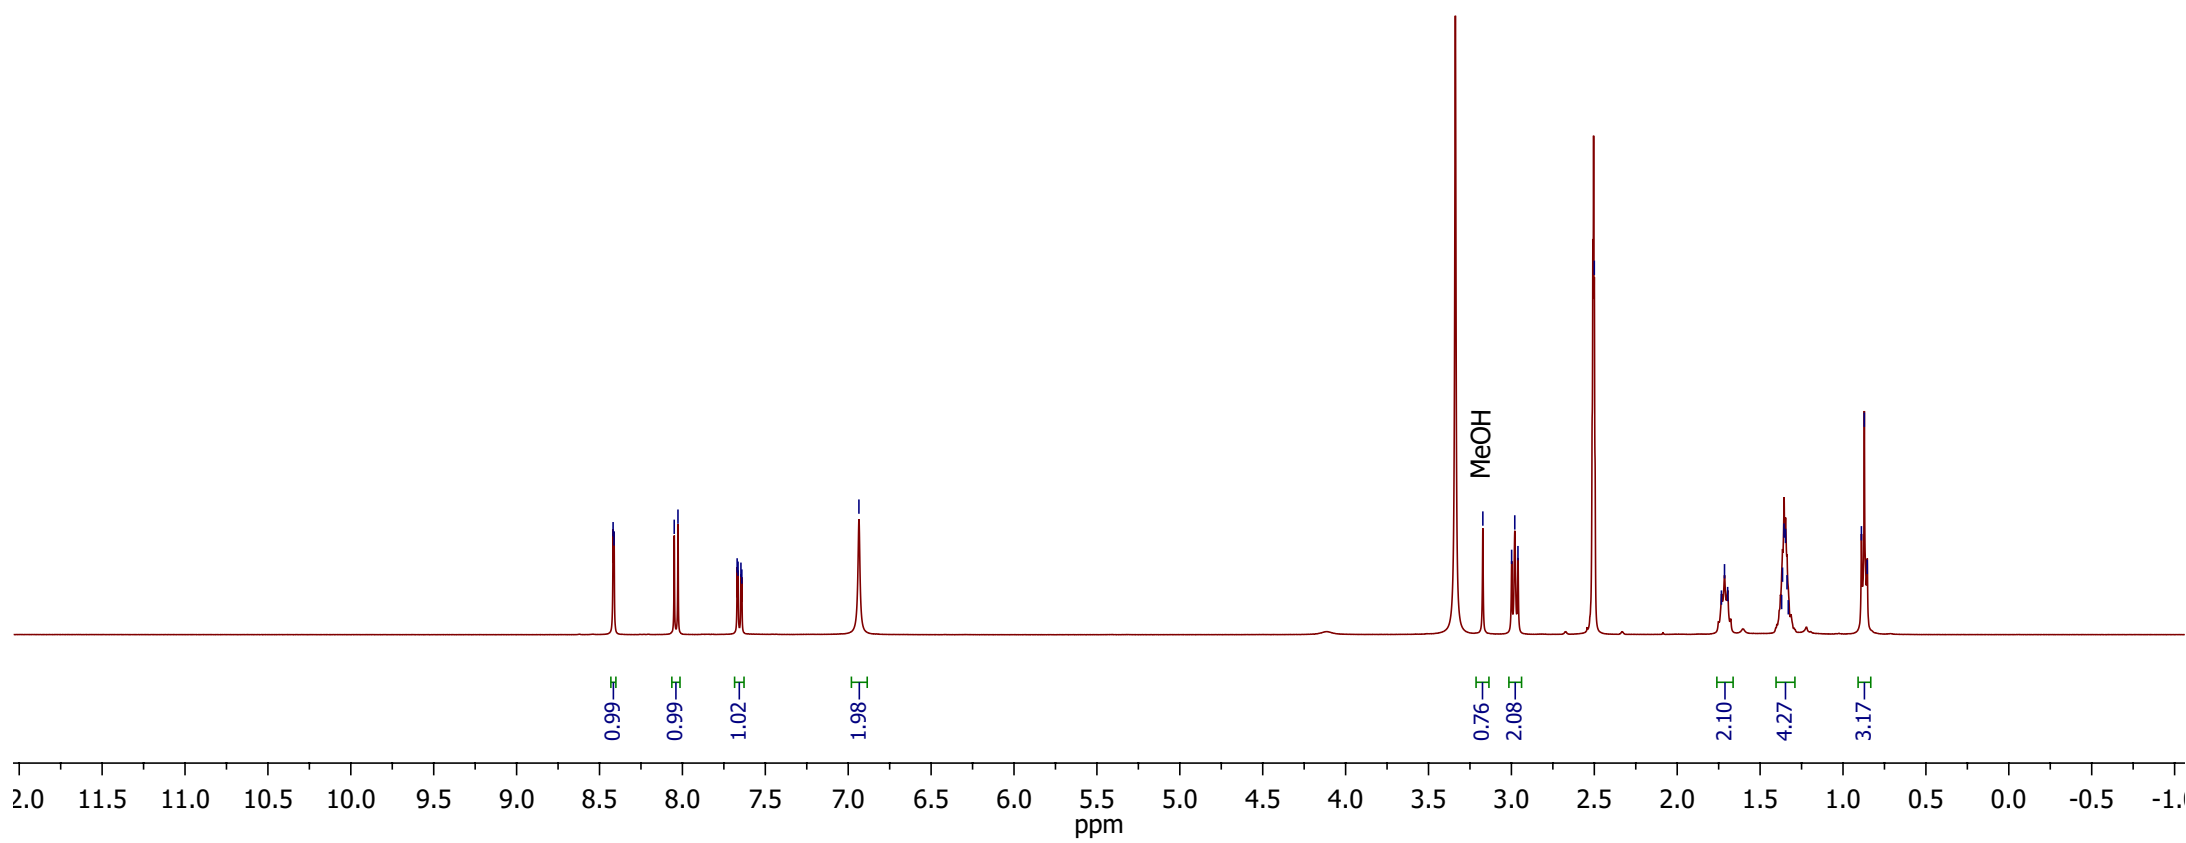

$^{13}\text{C}$  NMR, DMSO- $d_6$ , 101 MHz

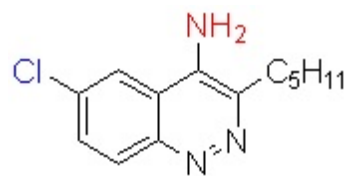

**10b**

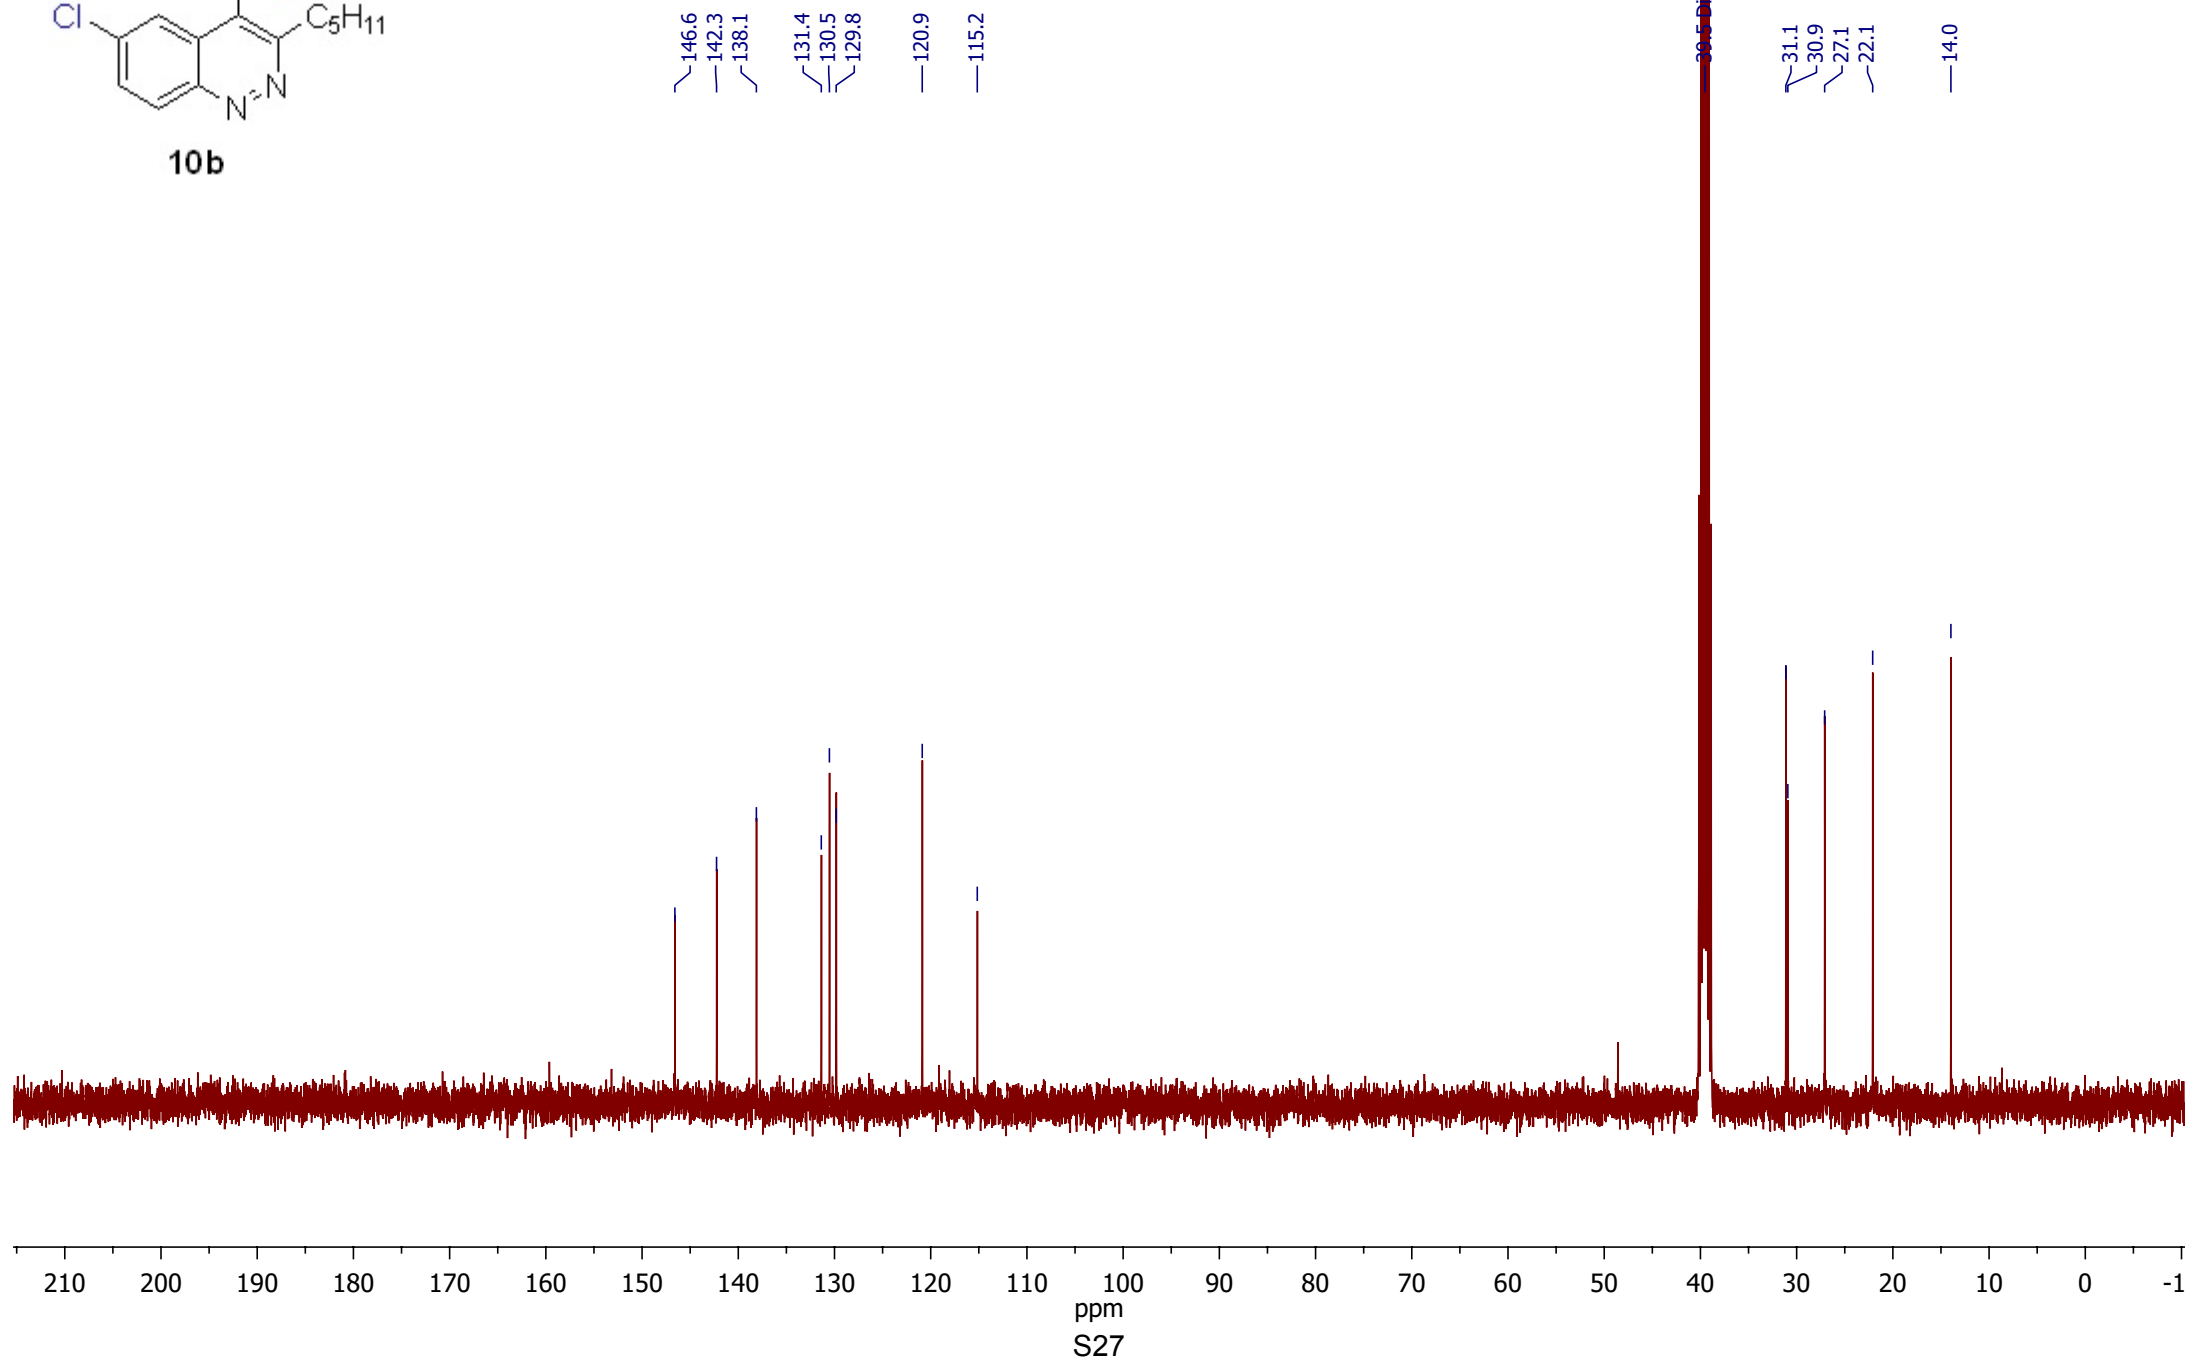

DEPT NMR, DMSO-*d*<sub>6</sub>, 101 MHz

131.0  
130.3

121.3

31.6

31.4

27.6

22.6

14.4

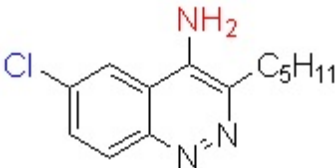

10b

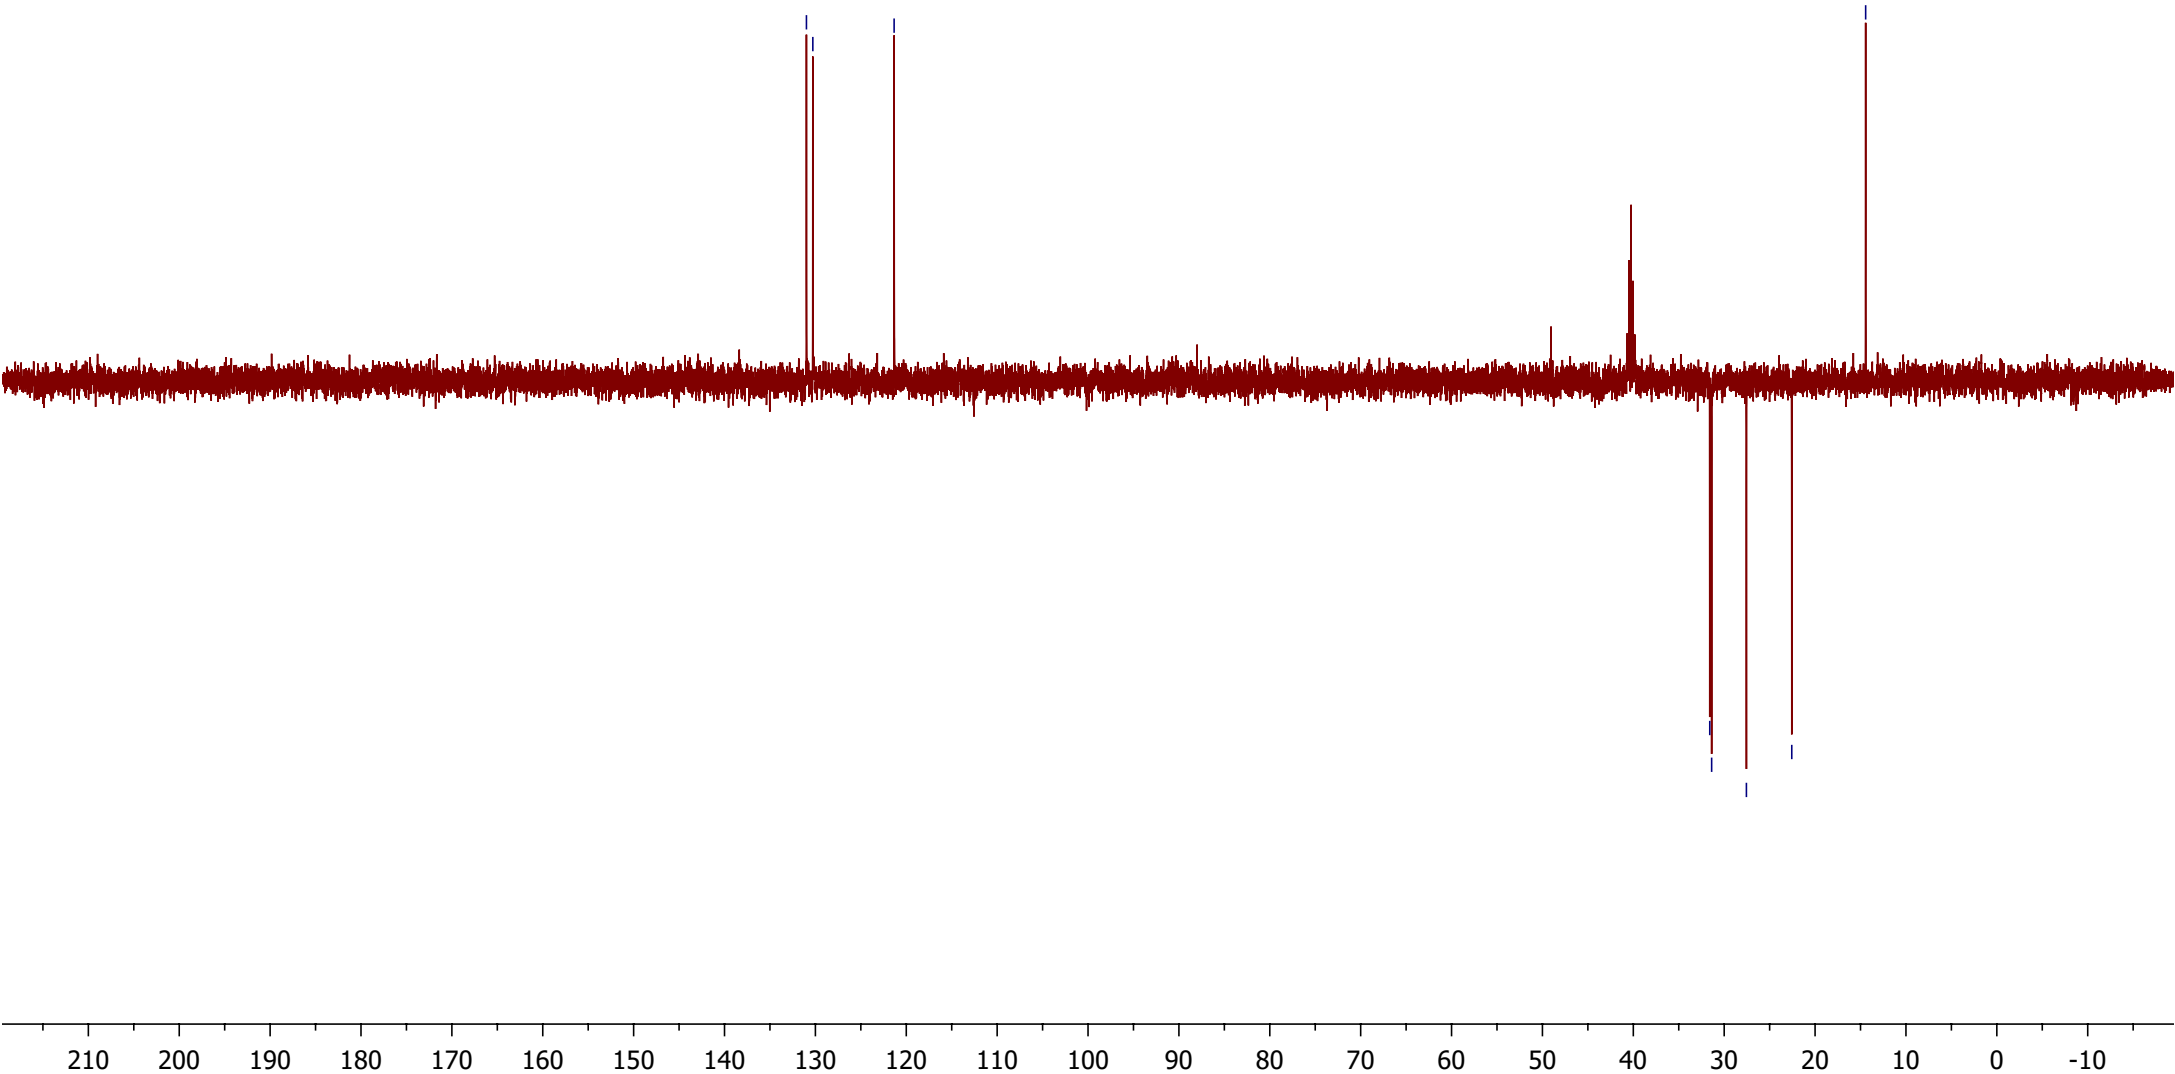

## Details of HPLC Measurements and Copies of HPLC Chromatograms

**Table S1.** Calibration equation and  $R^2$  for amine **6** and azide **5**

| Compound       | Calibration equation                  | $R^2$  |
|----------------|---------------------------------------|--------|
| Amine <b>6</b> | $Y = aX$ , $a = 2.271414\text{e-}005$ | 0.9992 |
| Azide <b>5</b> | $Y = aX$ , $a = 4.93494\text{e-}005$  | 0.9897 |

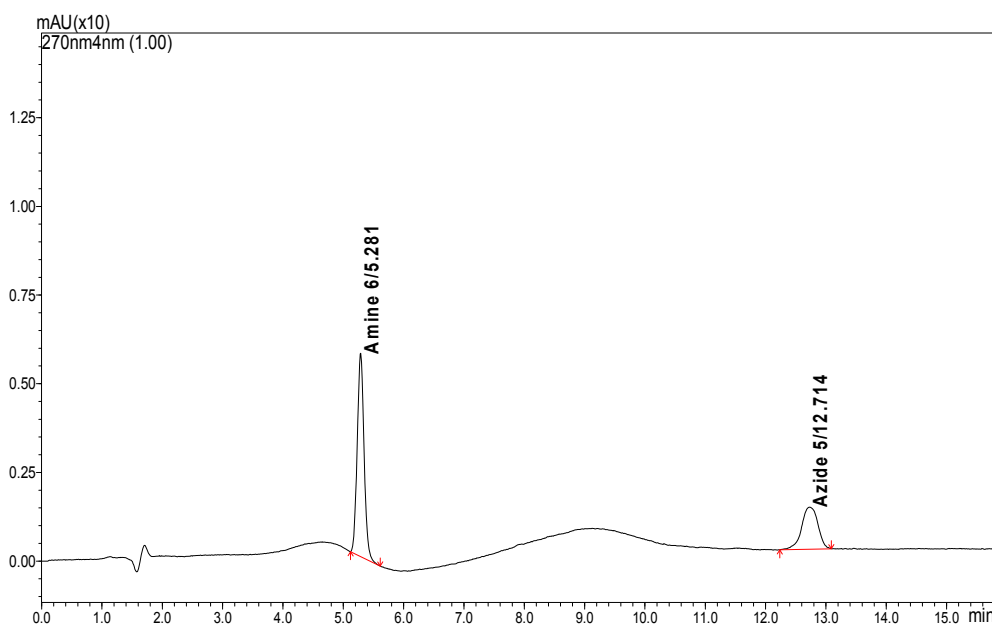

**Fig. S1.** A typical chromatogram of a standard solution of amine **6** and azide **5** (1  $\mu\text{g/mL}$ ) by RP HPLC with photodiode array detection (270 nm). HPLC conditions: eluent composition - water with 0.1% HCOOH (solvent A) and acetonitrile with 0.1% HCOOH (solvent B); gradient elution mode 30–70% of solvent B for 10 min; flow rate 0.3 ml/min, sample injected volume 2  $\mu\text{L}$ ; UV: 270 nm.

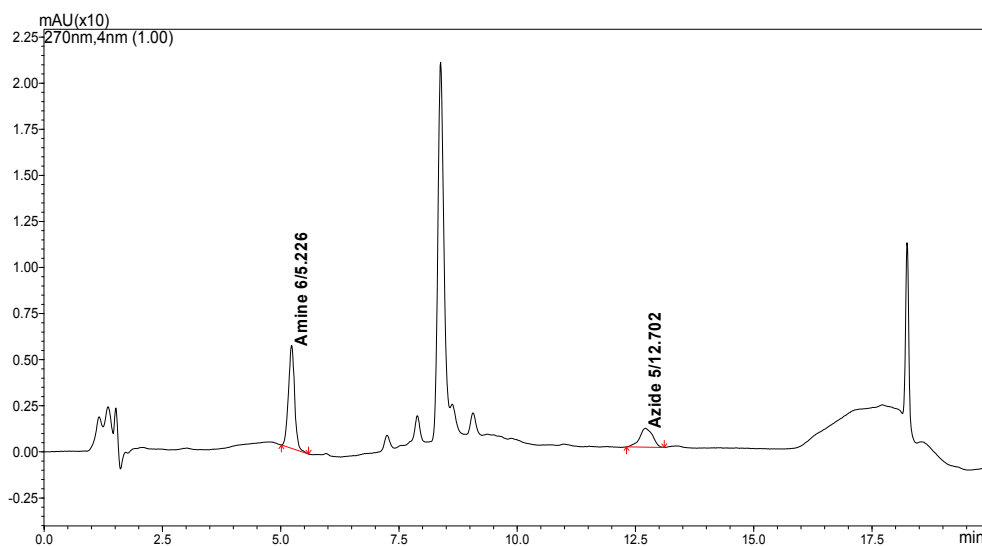

**Fig. S2.** Chromatogram of HepG2 cell lysate treated with azide **5** by RP HPLC with photodiode array detection (270 nm). HPLC conditions the same as for Fig. S1.

**Table S2.** Concentrations of azide **5** and amine **6** in the samples of cells lysate after the incubation of cells with azide **5**.

|                | Retention time,<br>min | Concentration,<br>$\mu\text{g/ml}$ | Concentration,<br>$\mu\text{M}$ | Amine <b>6</b> to azide <b>5</b><br>ratio |
|----------------|------------------------|------------------------------------|---------------------------------|-------------------------------------------|
| Amine <b>6</b> | 5.23                   | $1.14 \pm 0.02$                    | $3.60 \pm 0.06$                 | 1.23                                      |
| Azide <b>5</b> | 12.7                   | $1.00 \pm 0.03$                    | $2.92 \pm 0.09$                 |                                           |

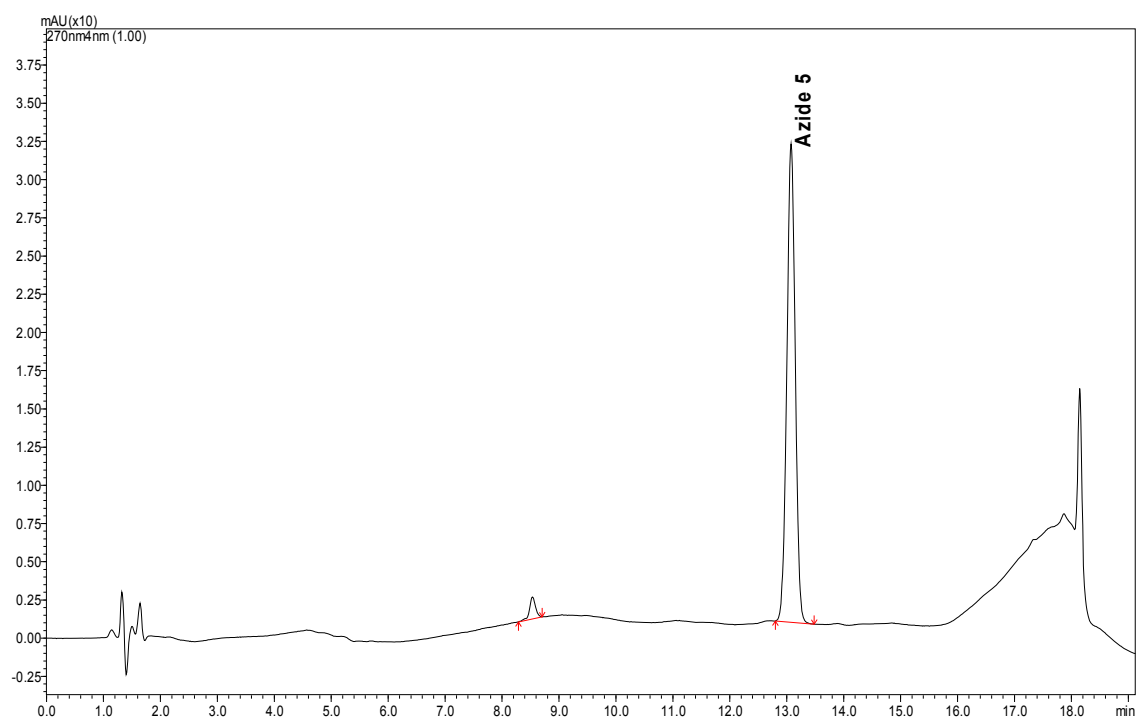

**Fig. S3.** A typical chromatogram of a standard solution of azide **5** by RP HPLC with photodiode array detection (270 nm). HPLC conditions the same as for Fig. S1.

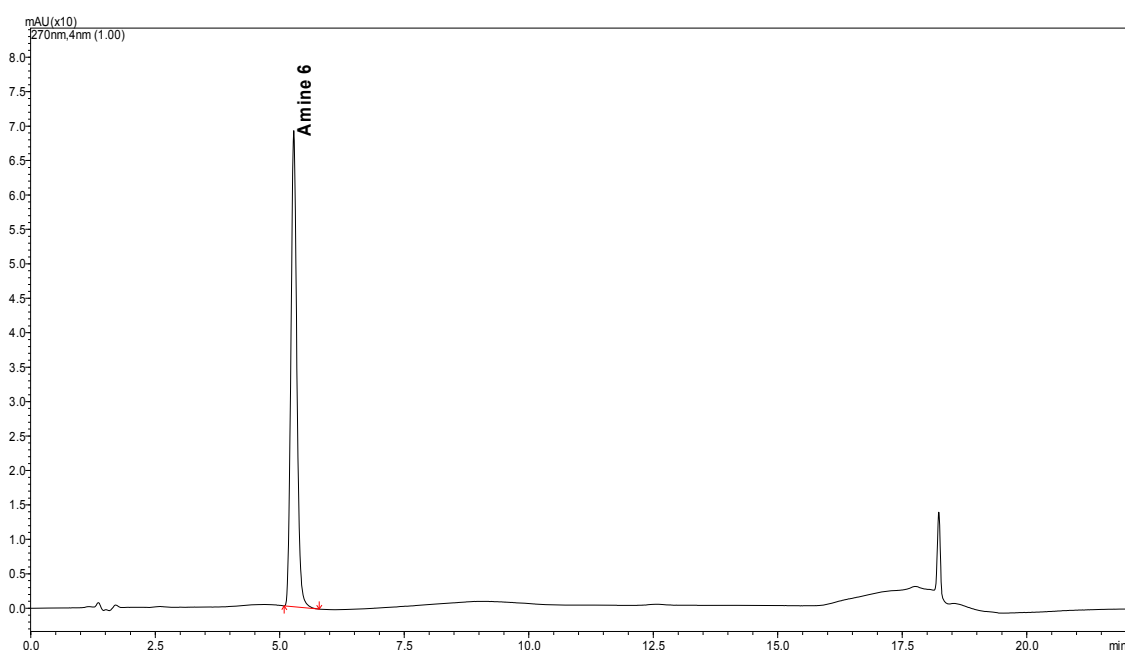

**Fig. S4.** A typical chromatogram of a standard solution of amine **6** by RP HPLC with photodiode array detection (270 nm). HPLC conditions the same as for Fig. S1.

## Details of QY Fluorescence Measurements

**Table S3.** Preparation of stock solution and working solutions of azide **5** and amine **6** for the measurements of absolute quantum yields (QY).

| Compound       | Mass, mg | Mw, g/mol | Volume of THF ( $\mu\text{L}$ ) for the preparation of stock solution ( $c = 1 \times 10^{-3}$ mol/L) | Concentration of the working solution, mol/L / Solvent | Volume of the stock solution for the preparation of working solutions (10 mL) | Volume of solvents (THF, <i>i</i> -PrOH, H <sub>2</sub> O) for the preparation of working solutions (10 mL) |
|----------------|----------|-----------|-------------------------------------------------------------------------------------------------------|--------------------------------------------------------|-------------------------------------------------------------------------------|-------------------------------------------------------------------------------------------------------------|
| Azide <b>5</b> | 1.00     | 342.4     | 2920                                                                                                  | $5 \times 10^{-6}$ / THF                               | 50 $\mu\text{L}$                                                              | 9950 $\mu\text{L}$ for each sample                                                                          |
|                |          |           |                                                                                                       | $5 \times 10^{-6}$ / H <sub>2</sub> O                  | 50 $\mu\text{L}$                                                              |                                                                                                             |
| Amine <b>6</b> | 0.80     | 316.2     | 2530                                                                                                  | $1.4 \times 10^{-6}$ / THF                             | 140 $\mu\text{L}$                                                             |                                                                                                             |
|                |          |           |                                                                                                       | $1.4 \times 10^{-6}$ / MeCN                            | 140 $\mu\text{L}$                                                             |                                                                                                             |
|                |          |           |                                                                                                       | $1.4 \times 10^{-6}$ / <i>i</i> -PrOH                  | 140 $\mu\text{L}$                                                             |                                                                                                             |
|                |          |           |                                                                                                       | $1.4 \times 10^{-6}$ / <i>i</i> -H <sub>2</sub> O      | 140 $\mu\text{L}$                                                             |                                                                                                             |

## Experimental details for the synthesis of amines 7a,b.

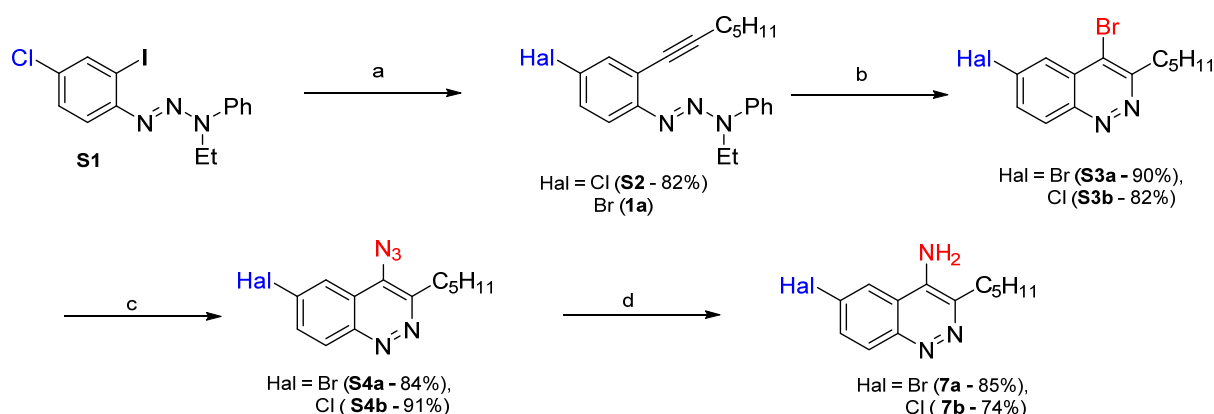

Reagents and conditions: *a* – hept-1-yne (1.5 equiv), Pd(PPh<sub>3</sub>)<sub>4</sub> (2.5 mol%), CuI (10 mol%), KF (5 equiv), DMF, 40 °C; *b* – HBr (20 equiv), acetone, 0.1 M, r.t., 10 min; *c* – NaN<sub>3</sub> (5 equiv), 50 °C, 24h; *d* – NaBH<sub>4</sub> (1.5 equiv), MeOH, r.t., 1 h.

**Scheme S1.** Synthesis of 6-bromo- and 6-chlorocinnoline-4-amines **10a,b**.

**(E)-1-(4-chloro-2-iodophenyl)-3-ethyl-3-phenyltriazen-1-ene (S1):** Triazene **S1** was synthesized in accordance with the known procedure described for (E)-1-(4-bromo-2-iodophenyl)-3-ethyl-3-phenyltriazen-1-ene triazene [1] from 4-chloro-2-iodoaniline (2.56 g, 10.1 mmol). Purification of the crude product by column chromatography using hexane / triethylamine (100 : 0.01) as the eluent gave 2.29 g of **S2** (59%). <sup>1</sup>H NMR (400 MHz, acetone-*d*<sub>6</sub>) δ = 7.95 (d, *J* = 2.3 Hz, 1H), 7.64 – 7.54 (m, 3H), 7.49 – 7.40 (m, 3H), 7.24 – 7.16 (m, 1H), 4.45 (q, *J* = 7.0 Hz, 2H), 1.38 (t, *J* = 7.0 Hz, 3H). <sup>13</sup>C NMR (101 MHz, acetone-*d*<sub>6</sub>) δ = 149.8, 144.7, 139.1, 132.6, 130.2, 130.0, 125.2, 119.6, 118.2, 97.8, 41.8, 11.3. HRMS (ESI): *m/z* calcd for C<sub>14</sub>H<sub>13</sub>ClN<sub>3</sub>I + H<sup>+</sup>: 385.9915 [M+H]<sup>+</sup>; found: 385.9900.

**(E)-1-(4-Chloro-2-(hept-1-yn-1-yl)phenyl)-3-ethyl-3-phenyltriazen-1-ene (S2):** To a stirred degassed solution of triazene **S1** (2.28 g, 5.91 mmol, 1.00 equiv) in anhydrous DMF (30.0 mL, *c* = 0.2 M) were added KF (1.72 g, 29.6 mmol, 5.00 equiv), Pd(PPh<sub>3</sub>)<sub>4</sub> (171 mg, 0.148 mmol, 2.5 mol%) and CuI (113 mg, 0.591 mmol, 10 mol%). The flask was degassed once again using a freeze-pump-thaw technique over three degassing cycles. After that, hept-1-yne (8.87 mmol, 853 mg, 0.765 mL, 1.50 equiv) was added with a syringe. The reaction mixture was stirred at 40 °C under an Ar atmosphere for 24 hours (TLC control). Then the reaction mixture was cooled, poured into a saturated aqueous solution of NH<sub>4</sub>Cl (200 mL), and extracted with ethyl acetate (50.0 mL) three times. The combined organic layers were washed with a saturated aqueous solution of NH<sub>4</sub>Cl (150 mL) and two times with brine (150 mL), dried over anhydrous Na<sub>2</sub>SO<sub>4</sub>, and concentrated under reduced pressure. Purification of the crude product by column chromatography on silica gel (eluent: hexane/EtOAc/ Et<sub>3</sub>N (90 : 1 : 0.009) gave **S2** (1.73 g, 83%) as a yellow oil. <sup>1</sup>H NMR (400 MHz, acetone-*d*<sub>6</sub>) δ = 7.61 – 7.52 (m, 3H), 7.46 – 7.39 (m, 3H), 7.33 (dd, *J* = 8.7 Hz, 2.4 Hz, 1H), 7.19 – 7.14 (m, 1H), 4.42 (q, *J* = 7.0 Hz, 2H), 2.48 (t, *J* = 7.0 Hz, 2H), 1.67 – 1.57 (m, 2H), 1.52 – 1.42 (m, 2H), 1.41 – 1.30 (m, 5H), 0.91 (t, *J* = 7.2 Hz, 3H). <sup>13</sup>C NMR (101 MHz, acetone-*d*<sub>6</sub>) δ = 151.2, 144.9, 133.0, 131.6, 130.2, 129.2, 124.8, 122.6, 120.0, 117.9, 97.1, 78.1, 41.1, 31.9, 29.2, 22.9, 20.1, 14.3, 11.2. HRMS (ESI): *m/z* calcd for C<sub>21</sub>H<sub>24</sub>ClN<sub>3</sub> + H<sup>+</sup>: 354.1732 [M+H]<sup>+</sup>; found: 354.1731.

**4,6-Dibromo-3-pentylcinnoline (S3a):** Cinnoline **S3a** was synthesized in accordance with the general procedure for the Richter-type cyclization from triazene **1a** (1.00 g, 2.51 mmol, 1.00



equiv). Purification of the crude product by column chromatography using hexane/EtOAc (20:1) as the eluent gave **S3a** (805 mg, 90 %) as a yellow solid. m.p. 98–99 °C. The spectral data correspond to the data reported earlier.[2] <sup>1</sup>H NMR (400 MHz, acetone-*d*<sub>6</sub>) δ = 8.44 (d, *J* = 9.0 Hz, 1H), 8.38 (d, *J* = 2.1 Hz, 1H), 8.09 (dd, *J* = 9.0 Hz, 2.1 Hz, 1H), 3.46 – 3.38 (m, 2H), 2.00 – 1.87 (m, 2H), 1.55 – 1.37 (m, 4H), 0.94 (t, *J* = 7.1 Hz, 3H).

**4-Bromo-6-chloro-3-pentylcinnoline (S3b):** Cinnoline **S3b** was synthesized in accordance with the general procedure for the Richter-type cyclization from triazene **S2** (968 mg, 2.74 mmol). Purification of the crude product by column chromatography using hexane/EtOAc (20:1 → 15:1) as the eluent gave **S3b** (704 mg, 82 %) as an orange solid. m.p. 35–36 °C. <sup>1</sup>H NMR (400 MHz, acetone-*d*<sub>6</sub>): δ = 8.47 (d, *J* = 9.0 Hz, 1H), 8.12 (d, *J* = 2.2 Hz, 1H), 7.91 (dd, *J* = 9.0 Hz, 2.2 Hz, 1H), 3.40 – 3.34 (m, 2H), 1.94 – 1.85 (m, 2H), 1.49 – 1.38 (m, 4H), 0.92 (t, *J* = 7.1 Hz, 3H). <sup>13</sup>C NMR (101 MHz, acetone-*d*<sub>6</sub>): δ = 158.5, 148.8, 139.3, 133.0, 132.4, 128.1, 125.7, 125.3, 36.8, 32.3, 29.3, 23.1, 14.3. HRMS (ESI): *m/z* calcd for C<sub>13</sub>H<sub>14</sub>BrClN<sub>2</sub>+H<sup>+</sup>: 315.0081 [*M*+H]<sup>+</sup>; found: 315.0067.

**4-Azido-6-bromo-3-pentylcinnoline (S4a):** Azidocinnoline **S4a** was synthesized in accordance with the general procedure for the nucleophilic substitution from 4-bromocinnoline **S3a** (804 mg, 2.25 mmol, 1 equiv) and NaN<sub>3</sub> (730 mg, 11.2 mmol, 5 equiv). Purification of the crude product by column chromatography using hexane / EtOAc (10:1) as the eluent gave **S4a** (606 mg, 84 %) as a yellow solid. m.p. 78–79 °C. <sup>1</sup>H NMR (400 MHz, acetone-*d*<sub>6</sub>) δ = 8.41 (d, *J* = 2.0 Hz, 1H), 8.36 (d, *J* = 9.0 Hz, 1H), 8.02 (dd, *J* = 9.0 Hz, 2.0 Hz, 1H), 3.42 – 3.35 (m, 2H), 1.99 – 1.88 (m, 2H), 1.55 – 1.38 (m, 4H), 0.94 (t, *J* = 7.1 Hz, 3H).

**4-Azido-6-chloro-3-pentylcinnoline (S4b):** Azidocinnoline **S4b** was synthesized in accordance with the general procedure for the nucleophilic substitution from 4-bromocinnoline **S4b** (536 mg, 1.71 mmol, 1 equiv) and NaN<sub>3</sub> (556 mg, 8.55 mmol, 5 equiv). Purification of the crude product by column chromatography using hexane/EtOAc (10:1) as the eluent gave **S4b** (435 mg, 92 %) as an orange solid. m.p. 54–55 °C solid. <sup>1</sup>H NMR (400 MHz, acetone-*d*<sub>6</sub>) δ = 8.41 (d, *J* = 9.1 Hz, 1H), 8.18 (d, *J* = 2.1 Hz, 1H), 7.86 (dd, *J* = 9.1 Hz, 2.1 Hz, 1H), 3.40 – 3.29 (m, 2H), 1.91 (m, 2H), 1.53 – 1.36 (m, 4H), 0.92 (t, *J* = 7.0 Hz, 3H). <sup>13</sup>C NMR (101 MHz, acetone-*d*<sub>6</sub>) δ = 151.9, 149.2, 137.5, 132.6, 132.4, 132.1, 122.0, 121.3, 32.9, 32.3, 29.9, 23.1, 14.3. HRMS (ESI): *m/z* calcd for C<sub>13</sub>H<sub>14</sub>ClN<sub>5</sub>+H<sup>+</sup>: 276.1010 [*M*+H]<sup>+</sup>; found: 276.1009.

**6-Bromo-3-pentylcinnolin-4-amine (7a):** Amine **7a** was obtained in accordance with the general procedure for the reduction from azide **S4a** (60.0 mg, 0.188 mmol) and NaBH<sub>4</sub> (11.0 mg, 0.282 mmol, 1.50 equiv) in methanol (1.88 mL). The crude product as a beige solid (46.8 mg, 85 %) was a pure and did not require additional purification. Decomp. at 260 °C. <sup>1</sup>H NMR (400 MHz, DMSO-*d*<sub>6</sub>): δ = 8.57 (d, *J* = 2.0 Hz, 1H), 7.95 (d, *J* = 9.1 Hz, 1H), 7.76 (dd, *J* = 9.1 Hz, 2.0 Hz, 1H), 6.94 (s, 2H), 3.01 – 2.93 (m, 2H), 1.77 – 1.65 (m, 2H), 1.35 (m, 4H), 0.91 – 0.82 (m, 3H). <sup>13</sup>C NMR (101 MHz, DMSO-*d*<sub>6</sub>): δ = 147.2, 142.8, 138.4, 132.8, 131.0, 124.7, 120.5, 116.1, 31.6, 31.4, 27.6, 22.6, 14.4. HRMS (ESI): *m/z* calcd for C<sub>13</sub>H<sub>15</sub>BrN<sub>3</sub>+H<sup>+</sup>: 294.0600 [*M*+H]<sup>+</sup>; found: 294.0608.

**6-Chloro-3-pentylcinnolin-4-amine (7b):** Amine **7b** was obtained in accordance with the general procedure for the reduction from azide **S4b** (57.8 mg, 0.210 mmol) and NaBH<sub>4</sub> (12.2 mg, 0.320 mmol, 1.50 equiv) in methanol (2.10 mL). The crude product as a beige solid (38.7 mg, 74 %) was a pure and did not require additional purification. m.p. 213–215 °C. <sup>1</sup>H NMR (400 MHz, DMSO-*d*<sub>6</sub>) δ = 8.41 (d, *J* = 2.2 Hz, 1H), 8.03 (d, *J* = 9.1 Hz, 1H), 7.65 (dd, *J* = 9.1 Hz, 2.2 Hz, 1H), 6.93 (s, 2H), 3.01 – 2.93 (m, 2H), 1.71 (m, 2H), 1.35 (m, 4H), 0.90 – 0.83 (m, 3H). <sup>13</sup>C NMR (101 MHz, DMSO-*d*<sub>6</sub>) δ = 146.6, 142.3, 138.1, 131.4, 130.5, 129.8, 120.9, 115.2, 31.1, 30.9, 27.1, 22.1, 14.0. HRMS (ESI): *m/z* calcd for C<sub>13</sub>H<sub>15</sub>ClN<sub>3</sub>+H<sup>+</sup>: 250.1106 [*M*+H]<sup>+</sup>; found: 250.1111.

## References

1. Danilkina, N.A.; Vlasov, P.S.; Vodianik, S.M.; Kruchinin, A.A.; Vlasov, Y.G.; Balova, I.A. Synthesis and chemosensing properties of cinnoline-containing poly(arylene ethynylene)s. *Beilstein J. Org. Chem.* **2015**, *11*, 373–384.
2. Danilkina, N.A.; Bukhtiarova, N.S.; Govdi, A.I.; Vasileva, A.A.; Rumyantsev, A.M.; Volkov, A.A.; Sharaev, N.I.; Povolotskiy, A. V.; Boyarskaya, I.A.; Korniyakov, I. V.; et al. Synthesis and Properties of 6-Aryl-4-azidocinnolines and 6-Aryl-4-(1,2,3-1H-triazol-1-yl)cinnolines. *Molecules* **2019**, *24*, 2386.
